# Supplementary material for: Palladium/copper-cocatalyzed three-component tandem cyclization of o-alkenyl arylisocyanides and sulfur ylides with alcohols: direct synthesis of spiro 3,3′-cyclopropyl oxindoles
Source: Royal Society of Chemistry journal article supplement (doi:10.1039/d4qo00560k), 2024-01-01
Supplement: d4qo00560k2.pdf [file d4qo00560k2.pdf]

## Supporting Information

### **Palladium/copper-cocatalyzed three-component tandem cyclization of *o*-alkenyl arylisocyanides, sulfur ylides with alcohols: direct synthesis of spiro 3,3'-cyclopropyl oxindoles**

Yue Gong, Xue-Cen Xu, Zi-Xuan Yang, and Yu-Long Zhao\*

Jilin Province Key Laboratory of Organic Functional Molecular Design & Synthesis, Faculty of Chemistry, Northeast Normal University, Changchun 130024, China; E-mail: [zhaoyl351@nenu.edu.cn](mailto:zhaoyl351@nenu.edu.cn)

### Table of contents

|                                                                                                         |              |
|---------------------------------------------------------------------------------------------------------|--------------|
| <b>I. General Information .....</b>                                                                     | <b>2</b>     |
| <b>II. Synthetic Procedures and Analytical Data of Compounds 4.....</b>                                 | <b>3-21</b>  |
| <b>III. Synthetic Procedures and Analytical Data of Compounds 6.....</b>                                | <b>22-24</b> |
| <b>IV. Synthetic Procedures and Analytical Data of Compounds 7.....</b>                                 | <b>25-27</b> |
| <b>VI. The Mechanism Studies.....</b>                                                                   | <b>28</b>    |
| <b>V. The X-ray Analytical data of Compound 4ai and 7a.....</b>                                         | <b>29</b>    |
| <b>VII. References.....</b>                                                                             | <b>30</b>    |
| <b>VIII. Copies of <sup>1</sup>H NMR, <sup>13</sup>C NMR and <sup>19</sup>F NMR Spectra of 4-7.....</b> | <b>31-91</b> |

## I. General Information:

All reagents were commercial and were used without further purification. *o*-Alkenyl arylisocyanide **2** were synthesized according to known literature procedure.<sup>1</sup> Sulfur ylides **1** were prepared according to the previous method reported.<sup>2</sup> Chromatography was carried on flash silica gel (300-400 mesh). All reactions were monitored by TLC, which was performed on percolated aluminum sheets of silica gel 60 (F254). Unless noted, the <sup>1</sup>H NMR spectra were recorded at 500 MHz, 600 MHz in CDCl<sub>3</sub>, the <sup>13</sup>C NMR spectra were recorded at 151 MHz in CDCl<sub>3</sub> with TMS as internal standard, and the <sup>19</sup>F NMR spectra were recorded at 565 MHz in CDCl<sub>3</sub>. All coupling constants (*J* values) were reported in Hertz (Hz). High-resolution mass spectra (HRMS) were obtained using a Bruker microTOF II focus spectrometer (ESI). The compounds **4ai** and **7a** were glued on a glass fiber. Data were collected at 293 K using graphite-monochromated Mo K radiation ( $\lambda = 0.71073 \text{ \AA}$ ) and IP technique in the range  $2.19^\circ < \theta < 27.48^\circ$ . Empirical absorption correction was applied. The structures were solved by the direct method and refined by the full-matrix least-squares method on  $F^2$  using the SHELXS 97 crystallographic software package. Anisotropic thermal parameters were used to refine all non-hydrogen atoms. Hydrogen atoms were located from difference Fourier maps.

## II. Synthetic Procedures and Analytical Data of Compounds 4 (4aa as example):

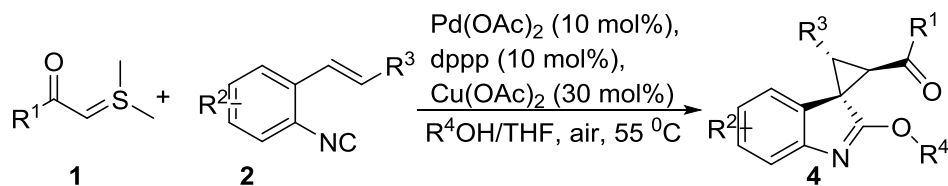

A flame-dried Schlenk tube equipped with a magnetic stir bar was charged with **1a** (108.2 mg, 0.6 mmol), **2a** (37.4 mg, 0.2 mmol), Pd(OAc)<sub>2</sub> (4.4 mg, 0.02 mmol), dppp (8.2 mg 0.02 mmol) and Cu(OAc)<sub>2</sub> (10.8 mg 0.06 mmol), then 2.0 mL solution of anhydrous THF and CF<sub>3</sub>CH<sub>2</sub>OH (2.0 mL, V/V = 1/6) were added under air. The reaction was stirred at 55 °C for 12 h. After the reaction was completed, the reaction mixture was extracted with CH<sub>2</sub>Cl<sub>2</sub> (5.0 mL × 3). The combined organic extracts were dried over anhydrous NaSO<sub>4</sub>, filtered and concentrated under reduced pressure to yield the corresponding crude product, which was purified by silica gel chromatography (EtOAc/petroleum ether = 1/10, V/V) to give **4aa** (62.9 mg, 78%) as a yellow liquid.

### Methyl (1*S*,2*R*,3*R*)-2-benzoyl-2'-(2,2,2-trifluoroethoxy)spiro[cyclopropane-1,3'-indole]-3-carboxylate (**4aa**):

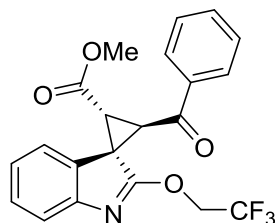

Following the general procedure, **4aa** was isolated by flash chromatography on silica (EtOAc/PE = 1/10) as a yellow liquid (62.9 mg, 78% yield, 6:1 dr); <sup>1</sup>H NMR (500 MHz, CDCl<sub>3</sub>) δ = 7.72 (d, *J* = 7.4 Hz, 2H), 7.45 (t, *J* = 7.4 Hz, 1H), 7.32 (t, *J* = 7.8 Hz, 2H), 7.29 (d, *J* = 7.7 Hz, 1H), 7.17 (t, *J* = 7.1 Hz, 1H), 7.03 (d, *J* = 7.2 Hz, 1H), 6.96 (t, *J* = 7.5 Hz, 1H), 4.93 – 4.79 (m, 2H), 4.23 (d, *J* = 7.9 Hz, 1H), 3.68 (s, 3H), 3.66 (d, *J* = 8.0 Hz, 1H); <sup>13</sup>C NMR (151 MHz, CDCl<sub>3</sub>) δ = 189.60, 172.59, 165.35, 150.63, 135.36, 132.91, 130.22, 127.81, 127.56, 127.31, 123.47, 121.73(q, *J* = 277.7 Hz), 120.57, 118.38, 64.14 (q, *J* = 36.8 Hz), 51.66, 39.72, 35.84, 32.48; <sup>19</sup>F NMR (565

MHz, CDCl<sub>3</sub>)  $\delta$  = -73.90 (t,  $J$  = 8.2 Hz); HRMS (ESI)  $m/z$ : [M + H]<sup>+</sup> Calcd for C<sub>21</sub>H<sub>17</sub>F<sub>3</sub>NO<sub>4</sub><sup>+</sup> 404.1104; Found 404.1105.

**Methyl (1*S*,2*R*,3*R*)-3-(4-methylbenzoyl)-2'-(2,2,2-trifluoroethoxy)spiro[cyclopropane-1,3'-indole]-2-carboxylate (4ba):**

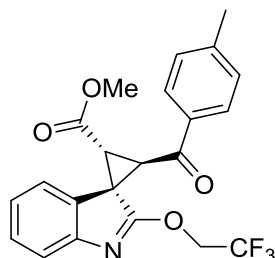

Following the general procedure, **4ba** was isolated by flash chromatography on silica (EtOAc/PE = 1/10) as a yellow solid (61.8 mg, 74% yield, 4:1 dr); <sup>1</sup>H NMR (600 MHz, CDCl<sub>3</sub>)  $\delta$  = 7.70 (d,  $J$  = 8.2 Hz, 2H), 7.35 (d,  $J$  = 7.7 Hz, 1H), 7.25 – 7.22 (m, 1H), 7.19 (d,  $J$  = 8.1 Hz, 2H), 7.09 (d,  $J$  = 7.4 Hz, 1H), 7.03 (t,  $J$  = 7.6 Hz, 1H), 4.98 – 4.88 (m, 2H), 4.28 (d,  $J$  = 7.9 Hz, 1H), 3.75 (s, 3H), 3.72 (d,  $J$  = 7.9 Hz, 1H), 2.35 (s, 3H); <sup>13</sup>C NMR (151 MHz, CDCl<sub>3</sub>)  $\delta$  = 190.07, 173.68, 166.47, 151.62, 145.05, 133.92, 131.33, 129.52, 128.50, 128.46, 124.46, 122.75(q,  $J$  = 277.4 Hz), 121.57, 119.33, 65.12 (q,  $J$  = 36.8 Hz), 40.62, 38.94, 36.84, 33.44, 21.69; <sup>19</sup>F NMR (565 MHz, CDCl<sub>3</sub>)  $\delta$  = -73.91 (t,  $J$  = 8.3 Hz); HRMS (ESI)  $m/z$ : [M + H]<sup>+</sup> Calcd for C<sub>22</sub>H<sub>19</sub>F<sub>3</sub>NO<sub>4</sub><sup>+</sup> 418.1261; Found 418.1251.

**Methyl (1*S*,2*R*,3*R*)-3-(4-methoxybenzoyl)-2'-(2,2,2-trifluoroethoxy)spiro[cyclopropane-1,3'-indole]-2-carboxylate (4ca):**

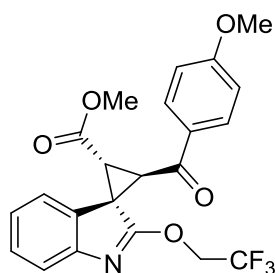

Following the general procedure, **4ca** was isolated by flash chromatography on silica (EtOAc/PE = 1/5) as a yellow solid (65.0 mg, 75% yield, 4:1 dr); <sup>1</sup>H NMR (600 MHz, CDCl<sub>3</sub>)  $\delta$  = 7.71 (d,  $J$  = 8.9 Hz, 2H), 7.27 (d,  $J$  = 7.6 Hz, 1H), 7.18 – 7.15 (m, , 1H), 7.04 – 7.01 (m, 1H), 6.97 – 6.93 (m, 1H), 6.78 (d,  $J$  = 8.9 Hz, 2H), 4.90 – 4.80 (m,

2H), 4.19 (d,  $J = 7.9$  Hz, 1H), 3.73 (s, 3H), 3.68 (s, 3H), 3.64 (d,  $J = 7.9$  Hz, 1H);  $^{13}\text{C}$  NMR (151 MHz,  $\text{CDCl}_3$ )  $\delta = 188.73, 173.74, 166.53, 164.20, 151.62, 131.43, 130.74, 129.45, 128.46, 124.44, 122.77$ (q,  $J = 277.6$  Hz), 121.59, 119.31, 114.05, 65.12 (q,  $J = 37.0$  Hz), 55.51, 52.64, 40.52, 36.71, 33.45;  $^{19}\text{F}$  NMR (565 MHz,  $\text{CDCl}_3$ )  $\delta = -73.89$  (t,  $J = 8.3$  Hz); HRMS (ESI)  $m/z$ :  $[\text{M} + \text{H}]^+$  Calcd for  $\text{C}_{22}\text{H}_{19}\text{F}_3\text{NO}_5^+$  434.1210; Found 434.1213.

**Methyl (1*S*,2*R*,3*R*)-3-(2-methoxybenzoyl)-2'-(2,2,2-trifluoroethoxy)spiro[cyclopropane-1,3'-indole]-2-carboxylate (4da):**

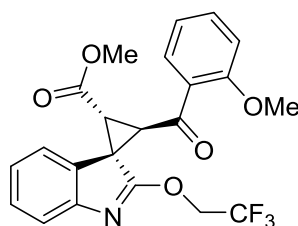

Following the general procedure, **4da** was isolated by flash chromatography on silica (EtOAc/PE = 1/5) as a yellow solid (49.4 mg, 57% yield, 5:1 dr);  $^1\text{H}$  NMR (500 MHz,  $\text{CDCl}_3$ )  $\delta = 7.71$  (dd,  $J = 7.8, 1.6$  Hz, 1H), 7.47 – 7.41 (m, 1H), 7.38 (d,  $J = 7.7$  Hz, 1H), 7.29 – 7.22 (m, 1H), 7.13 (d,  $J = 7.4$  Hz, 1H), 7.04 (t,  $J = 7.6$  Hz, 1H), 6.96 (t,  $J = 7.5$  Hz, 1H), 6.83 (d,  $J = 8.4$  Hz, 1H), 4.94 – 4.80 (m, 2H), 4.37 (d,  $J = 8.3$  Hz, 1H), 3.77 (d,  $J = 8.3$  Hz, 1H), 3.73 (s, 3H), 3.66 (s, 3H);  $^{13}\text{C}$  NMR (151 MHz,  $\text{CDCl}_3$ )  $\delta = 191.57, 174.53, 166.79, 159.27, 151.72, 134.85, 132.03, 130.86, 128.19, 126.88, 124.34, 122.76$  (q,  $J = 277.0$  Hz), 121.70, 120.81, 119.12, 111.69, 65.09 (q,  $J = 36.8$  Hz), 55.64, 52.54, 42.04, 40.90, 34.08;  $^{19}\text{F}$  NMR (565 MHz,  $\text{CDCl}_3$ )  $\delta = -73.88$  (t,  $J = 8.2$  Hz); HRMS (ESI)  $m/z$ :  $[\text{M} + \text{H}]^+$  Calcd for  $\text{C}_{22}\text{H}_{19}\text{F}_3\text{NO}_5^+$  434.1210; Found 434.1213.

**Methyl (1*S*,2*R*,3*R*)-2-([1,1'-biphenyl]-4-carbonyl)-2'-(2,2,2-trifluoroethoxy)spiro[cyclopropane-1,3'-indole]-3-carboxylate (4ea):**

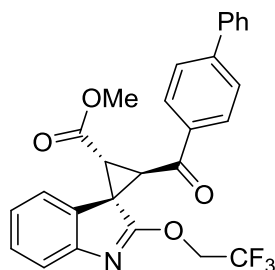

Following the general procedure, **4ea** was isolated by flash chromatography on silica (EtOAc/PE = 1/10) as a yellow liquid (70.0 mg, 73% yield, 4:1 dr);  $^1\text{H}$  NMR (500 MHz,  $\text{CDCl}_3$ )  $\delta$  = 7.88 (d,  $J$  = 8.4 Hz, 2H), 7.61 (d,  $J$  = 8.3 Hz, 2H), 7.56 – 7.54 (m, 2H), 7.44 (d,  $J$  = 7.2 Hz, 2H), 7.39 – 7.36 (m, 2H), 7.27 – 7.24 (m, 1H), 7.12 (d,  $J$  = 7.5 Hz, 1H), 7.05 (td,  $J$  = 7.6, 0.9 Hz, 1H), 5.00 – 4.91 (m, 2H), 4.34 (d,  $J$  = 7.9 Hz, 1H), 3.76 (d,  $J$  = 6.0 Hz, 4H);  $^{13}\text{C}$  NMR (151 MHz,  $\text{CDCl}_3$ )  $\delta$  = 190.10, 173.65, 166.42, 151.67, 146.68, 139.48, 135.02, 131.28, 128.98, 128.95, 128.61, 128.46, 127.46, 127.25, 124.52, 122.77 (q,  $J$  = 277.3 Hz), 121.61, 119.42, 65.16 (q,  $J$  = 36.8 Hz), 52.71, 40.75, 36.93, 33.50;  $^{19}\text{F}$  NMR (565 MHz,  $\text{CDCl}_3$ )  $\delta$  = -73.86 (t,  $J$  = 8.2 Hz); HRMS (ESI)  $m/z$ :  $[\text{M} + \text{H}]^+$  Calcd for  $\text{C}_{27}\text{H}_{21}\text{F}_3\text{NO}_4^+$  480.1417; Found 480.1417.

**Methyl (1*S*,2*R*,3*R*)-3-(4-chlorobenzoyl)-2'-(2,2,2-trifluoroethoxy)spiro[cyclopropane-1,3'-indole]-2-carboxylate (**4fa**):**

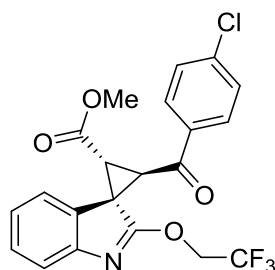

Following the general procedure, **4fa** was isolated by flash chromatography on silica (EtOAc/PE = 1/10) as a yellow liquid (59.5 mg, 68% yield, 4:1 dr);  $^1\text{H}$  NMR (500 MHz,  $\text{CDCl}_3$ )  $\delta$  = 7.65 (d,  $J$  = 8.6 Hz, 2H), 7.32 – 7.27 (m, 3H), 7.20 – 7.17 (m, 1H), 6.99 – 6.94 (m, 2H), 4.92 – 4.80 (m, 2H), 4.16 (d,  $J$  = 7.9 Hz, 1H), 3.69 (s, 3H), 3.65 (d,  $J$  = 7.9 Hz, 1H);  $^{13}\text{C}$  NMR (151 MHz,  $\text{CDCl}_3$ )  $\delta$  = 189.49, 173.45, 166.24, 151.62, 140.61, 134.62, 131.00, 129.67, 129.21, 128.72, 124.54, 122.72 (q,  $J$  = 277.6 Hz), 121.44, 119.50, 65.16 (q,  $J$  = 36.9 Hz), 52.75, 40.68, 36.71, 33.41;  $^{19}\text{F}$  NMR (565

MHz, CDCl<sub>3</sub>)  $\delta$  = -73.89 (t,  $J$  = 8.3 Hz); HRMS (ESI)  $m/z$ : [M + H]<sup>+</sup> Calcd for C<sub>21</sub>H<sub>16</sub>ClF<sub>3</sub>NO<sub>4</sub><sup>+</sup> 438.0714; Found 438.0716.

**Methyl (1*S*,2*R*,3*R*)-3-(4-fluorobenzoyl)-2'-(2,2,2-trifluoroethoxy)spiro[cyclopropane-1,3'-indole]-2-carboxylate (4ga):**

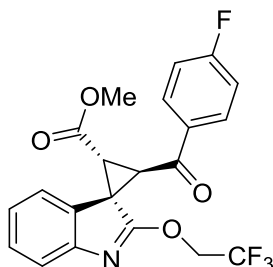

Following the general procedure, **4ga** was isolated by flash chromatography on silica (EtOAc/PE = 1/10) as a white solid (59.0 mg, 70% yield, 5:1 dr); <sup>1</sup>H NMR (500 MHz, CDCl<sub>3</sub>)  $\delta$  = 7.75 (dd,  $J$  = 8.4, 5.4 Hz, 2H), 7.29 (d,  $J$  = 7.7 Hz, 1H), 7.18 (t,  $J$  = 7.5 Hz, 1H), 7.00 – 6.93 (m, 4H), 4.92 – 4.80 (m, 2H), 4.17 (d,  $J$  = 7.9 Hz, 1H), 3.68 (s, 3H), 3.65 (d,  $J$  = 7.9 Hz, 1H); <sup>13</sup>C NMR (151 MHz, CDCl<sub>3</sub>)  $\delta$  = 189.03, 173.50, 166.28, 166.19 (d,  $J$  = 256.8 Hz), 151.64, 132.79 (d,  $J$  = 2.7 Hz), 131.09, 131.05 (d,  $J$  = 9.7 Hz), 128.67, 124.51, 122.73 (q,  $J$  = 277.5 Hz), 121.49, 119.46, 116.08 (d,  $J$  = 22.2 Hz), 65.15 (q,  $J$  = 36.9 Hz), 52.72, 40.64, 36.69, 33.44; <sup>19</sup>F NMR (565 MHz, CDCl<sub>3</sub>)  $\delta$  = -73.90 (t,  $J$  = 8.3 Hz), -103.09 (tt,  $J$  = 8.4, 5.3 Hz); HRMS (ESI)  $m/z$ : [M + H]<sup>+</sup> Calcd for C<sub>21</sub>H<sub>16</sub>F<sub>4</sub>NO<sub>4</sub><sup>+</sup> 422.1010; Found 422.1015.

**Methyl (1*S*,2*R*,3*R*)-2-(4-bromobenzoyl)-2'-(2,2,2-trifluoroethoxy)spiro[cyclopropane-1,3'-indole]-3-carboxylate (4ha):**

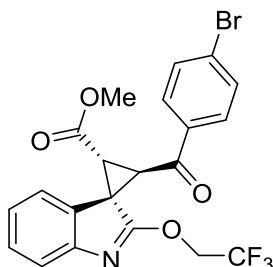

Following the general procedure, **4ha** was isolated by flash chromatography on silica (EtOAc/PE = 1/10) as a yellow liquid (70.4 mg, 73% yield, 5:1 dr); <sup>1</sup>H NMR (500 MHz, CDCl<sub>3</sub>)  $\delta$  = 7.57 (d,  $J$  = 8.5 Hz, 2H), 7.46 (d,  $J$  = 8.5 Hz, 2H), 7.29 (d,  $J$  = 7.6 Hz, 1H), 7.20 – 7.17 (m, 1H), 6.97 (d,  $J$  = 6.6 Hz, 2H), 4.92 – 4.80 (m, 2H), 4.15 (d,  $J$

= 7.9 Hz, 1H), 3.68 (s, 3H), 3.64 (d,  $J = 7.9$  Hz, 1H);  $^{13}\text{C}$  NMR (151 MHz,  $\text{CDCl}_3$ )  $\delta = 189.72, 173.44, 166.23, 151.61, 135.01, 132.21, 130.98, 129.72, 129.41, 128.74, 124.55, 122.71$  (q,  $J = 277.5$  Hz), 121.43, 119.51, 65.16 (q,  $J = 36.8$  Hz), 52.76, 40.68, 36.68, 33.39;  $^{19}\text{F}$  NMR (565 MHz,  $\text{CDCl}_3$ )  $\delta = -73.89$  (t,  $J = 8.2$  Hz); HRMS (ESI)  $m/z$ :  $[\text{M} + \text{H}]^+$  Calcd for  $\text{C}_{21}\text{H}_{16}\text{BrF}_3\text{NO}_4^+$  482.0209; Found 482.0209.

**Methyl (1*S*,2*R*,3*R*)-3-(4-fluorobenzoyl)-2'-(2,2,2-trifluoroethoxy)spiro[cyclopropane-1,3'-indole]-2-carboxylate (4ia):**

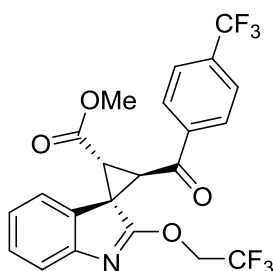

Following the general procedure, **4ia** was isolated by flash chromatography on silica ( $\text{EtOAc/PE} = 1/10$ ) as a yellow solid (54.7 mg, 58% yield, 5:1 dr);  $^1\text{H}$  NMR (500 MHz,  $\text{CDCl}_3$ )  $\delta = 7.81$  (d,  $J = 8.1$  Hz, 2H), 7.59 (d,  $J = 8.1$  Hz, 2H), 7.30 (d,  $J = 7.7$  Hz, 1H), 7.19 (d,  $J = 4.4$  Hz, 1H), 6.97 (d,  $J = 6.0$  Hz, 2H), 4.92 – 4.81 (m, 2H), 4.20 (d,  $J = 7.8$  Hz, 1H), 3.69 (s, 3H), 3.67 (d,  $J = 8.0$  Hz, 1H);  $^{13}\text{C}$  NMR (151 MHz,  $\text{CDCl}_3$ )  $\delta = 189.99, 173.32, 166.10, 151.64, 138.87, 135.13$  (q,  $J = 32.8$  Hz), 130.80, 128.86, 128.62, 125.95 (q,  $J = 3.5$  Hz), 124.60, 123.02 (q,  $J = 277.4$  Hz), 121.87 (d,  $J = 25.8$  Hz), 121.41, 119.60, 65.19 (q,  $J = 36.8$  Hz), 52.81, 40.84, 36.88, 33.41;  $^{19}\text{F}$  NMR (565 MHz,  $\text{CDCl}_3$ )  $\delta = -63.33, -63.35, -73.91$  (t,  $J = 8.2$  Hz),  $-74.16$  (t,  $J = 8.1$  Hz); HRMS (ESI)  $m/z$ :  $[\text{M} + \text{H}]^+$  Calcd for  $\text{C}_{22}\text{H}_{16}\text{F}_6\text{NO}_4^+$  472.0978; Found 472.0969.

**Methyl (1*S*,2*R*,3*R*)-3-(2-chlorobenzoyl)-2'-(2,2,2-trifluoroethoxy)spiro[cyclopropane-1,3'-indole]-2-carboxylate (4ja):**

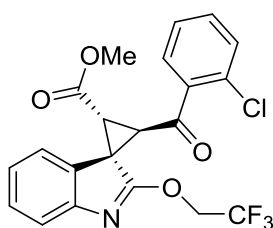

Following the general procedure, **4ja** was isolated by flash chromatography on silica



(EtOAc/PE = 1/5) as a yellow solid (46.4 mg, 53% yield, 6:1 dr);  $^1\text{H}$  NMR (600 MHz,  $\text{CDCl}_3$ )  $\delta$  = 7.40 (dd,  $J$  = 7.8, 1.7 Hz, 1H), 7.34 – 7.31 (m, 2H), 7.27 (dd,  $J$  = 8.0, 1.0 Hz, 1H), 7.25 – 7.21 (m, 2H), 7.16 (d,  $J$  = 7.6 Hz, 1H), 7.02 (td,  $J$  = 7.6, 1.0 Hz, 1H), 4.90 – 4.84 (m, 1H), 4.72 – 4.66 (m, 1H), 4.14 (d,  $J$  = 7.9 Hz, 1H), 3.71 (d,  $J$  = 7.9 Hz, 1H), 3.67 (s, 3H);  $^{13}\text{C}$  NMR (151 MHz,  $\text{CDCl}_3$ )  $\delta$  = 192.55, 173.72, 166.24, 151.86, 137.50, 133.25, 132.46, 131.25, 130.88, 130.55, 128.73, 127.18, 124.49, 122.67 (q,  $J$  = 277.5 Hz), 122.09, 119.40, 65.14 (q,  $J$  = 36.9 Hz), 52.71, 42.48, 40.56, 34.36;  $^{19}\text{F}$  NMR (565 MHz,  $\text{CDCl}_3$ )  $\delta$  = -73.90 (t,  $J$  = 8.3 Hz); HRMS (ESI)  $m/z$ :  $[\text{M} + \text{H}]^+$  Calcd for  $\text{C}_{21}\text{H}_{16}\text{ClF}_3\text{NO}_4^+$  438.0714; Found 438.0715.

**Methyl (1*S*,2*R*,3*R*)-3-(4-nitrobenzoyl)-2'-(2,2,2-trifluoroethoxy)spiro[cyclopropane-1,3'-indole]-2-carboxylate (4ka):**

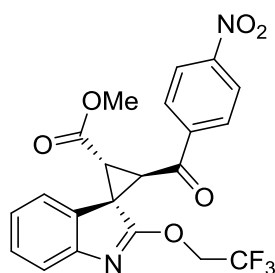

Following the general procedure, **4ka** was isolated by flash chromatography on silica (EtOAc/PE = 1/5) as a white solid (34.1 mg, 38% yield, 4:1 dr);  $^1\text{H}$  NMR (600 MHz,  $\text{CDCl}_3$ )  $\delta$  = 8.25 (d,  $J$  = 8.8 Hz, 2H), 7.94 (d,  $J$  = 8.8 Hz, 2H), 7.38 (d,  $J$  = 7.7 Hz, 1H), 7.30 – 7.27 (m, 1H), 7.05 (q,  $J$  = 6.8, 5.9 Hz, 2H), 5.00 – 4.90 (m, 2H), 4.27 (d,  $J$  = 7.8 Hz, 1H), 3.78 (s, 3H), 3.75 (d,  $J$  = 7.8 Hz, 1H);  $^{13}\text{C}$  NMR (151 MHz,  $\text{CDCl}_3$ )  $\delta$  = 189.60, 173.18, 165.94, 151.64, 150.69, 140.53, 130.58, 129.31, 129.01, 125.44, 124.66, 124.09, 122.68 (q,  $J$  = 277.5 Hz), 121.34, 119.70, 65.22 (q,  $J$  = 36.8 Hz), 52.90, 40.95, 36.94, 33.45;  $^{19}\text{F}$  NMR (565 MHz,  $\text{CDCl}_3$ )  $\delta$  = -73.87 (t,  $J$  = 8.1 Hz); HRMS (ESI)  $m/z$ :  $[\text{M} + \text{H}]^+$  Calcd for  $\text{C}_{21}\text{H}_{16}\text{F}_3\text{N}_2\text{O}_6^+$  449.0955; Found 449.0950.

**Methyl (1*S*,2*R*,3*R*)-2-(2-naphthoyl)-2'-(2,2,2-trifluoroethoxy)spiro[cyclopropane-1,3'-indole]-3-carboxylate (4la):**

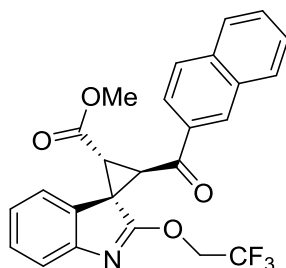

Following the general procedure, **4la** was isolated by flash chromatography on silica (EtOAc/PE = 1/5) as a yellow solid (49.0 mg, 54% yield, 4:1 dr);  $^1\text{H}$  NMR (500 MHz,  $\text{CDCl}_3$ )  $\delta$  = 8.21 (s, 1H), 7.80 (t,  $J$  = 7.1 Hz, 2H), 7.75 – 7.71 (m, 2H), 7.49 (t,  $J$  = 7.5 Hz, 1H), 7.44 (t,  $J$  = 7.4 Hz, 1H), 7.27 (d,  $J$  = 7.7 Hz, 1H), 7.15 (t,  $J$  = 7.6 Hz, 1H), 7.07 (d,  $J$  = 7.6 Hz, 1H), 6.95 (t,  $J$  = 7.6 Hz, 1H), 5.01 – 4.94 (m, 1H), 4.91 – 4.83 (m, 1H), 4.39 (d,  $J$  = 7.9 Hz, 1H), 3.72 (d,  $J$  = 8.0 Hz, 1H), 3.70 (s, 3H);  $^{13}\text{C}$  NMR (151 MHz,  $\text{CDCl}_3$ )  $\delta$  = 190.39, 173.69, 166.49, 151.64, 135.88, 133.66, 132.28, 131.28, 130.62, 129.74, 129.06, 128.81, 128.61, 127.77, 127.06, 124.51, 122.85 (q,  $J$  = 277.5 Hz), 123.50, 121.62, 119.41, 65.14 (q,  $J$  = 36.8 Hz), 52.74, 40.89, 37.00, 33.60;  $^{19}\text{F}$  NMR (565 MHz,  $\text{CDCl}_3$ )  $\delta$  = -73.79 (t,  $J$  = 8.3 Hz); HRMS (ESI)  $m/z$ :  $[\text{M} + \text{H}]^+$  Calcd for  $\text{C}_{25}\text{H}_{19}\text{F}_3\text{NO}_4^+$  454.1261; Found 454.1262.

**Methyl (1S,2R,3R)-3-(thiophene-2-carbonyl)-2'-(2,2,2-trifluoroethoxy)spiro[cyclopropane-1,3'-indole]-2-carboxylate (4ma):**

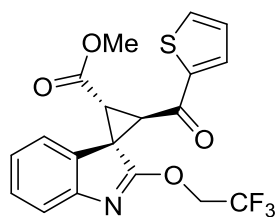

Following the general procedure, **4ma** was isolated by flash chromatography on silica (EtOAc/PE = 1/10) as a white solid (52.4 mg, 64% yield, 5:1 dr);  $^1\text{H}$  NMR (600 MHz,  $\text{CDCl}_3$ )  $\delta$  = 7.69 – 7.62 (m, 2H), 7.36 (d,  $J$  = 7.7 Hz, 1H), 7.29 – 7.26 (m, 1H), 7.22 – 7.20 (m, 1H), 7.07 (tt,  $J$  = 5.2, 3.0 Hz, 2H), 4.91 (td,  $J$  = 8.3, 4.2 Hz, 2H), 4.21 (d,  $J$  = 7.9 Hz, 1H), 3.75 (s, 3H), 3.71 (d,  $J$  = 7.8 Hz, 1H);  $^{13}\text{C}$  NMR (151 MHz,  $\text{CDCl}_3$ )  $\delta$  = 182.90, 173.53, 166.22, 151.71, 143.49, 135.23, 133.15, 131.22, 128.62, 128.49, 124.55, 122.73 (q,  $J$  = 277.5 Hz), 121.98, 119.36, 65.14 (q,  $J$  = 36.8 Hz), 52.72, 40.90, 37.31, 33.50;  $^{19}\text{F}$  NMR (565 MHz,  $\text{CDCl}_3$ )  $\delta$  = -73.91 (t,  $J$  = 8.4 Hz); HRMS (ESI)

m/z: [M + H]<sup>+</sup> Calcd for C<sub>19</sub>H<sub>15</sub>F<sub>3</sub>NO<sub>4</sub>S<sup>+</sup> 410.0668; Found 410.0682.

**Methyl (1*S*,2*R*,3*R*)-2-benzoyl-5'-methyl-2'-(2,2,2-trifluoroethoxy)spiro[cyclopropane-1,3'-indole]-3-carboxylate (4ab):**

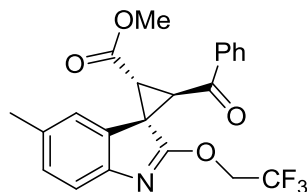

Following the general procedure, **4ab** was isolated by flash chromatography on silica (EtOAc/PE = 1/10) as a white solid (64.3 mg, 77% yield, 5:1 dr); <sup>1</sup>H NMR (500 MHz, CDCl<sub>3</sub>) δ = 7.80 (d, *J* = 7.4 Hz, 2H), 7.54 (t, *J* = 7.4 Hz, 1H), 7.41 (t, *J* = 7.7 Hz, 2H), 7.24 (d, *J* = 7.9 Hz, 1H), 7.05 (d, *J* = 7.9 Hz, 1H), 6.90 (s, 1H), 4.97 – 4.85 (m, 2H), 4.27 (d, *J* = 7.9 Hz, 1H), 3.75 (s, 3H), 3.69 (d, *J* = 7.9 Hz, 1H), 2.28 (s, 3H); <sup>13</sup>C NMR (151 MHz, CDCl<sub>3</sub>) δ = 190.72, 172.98, 166.45, 149.25, 136.43, 134.32, 133.91, 131.26, 129.14, 128.83, 128.36, 122.76 (q, *J* = 277.4 Hz), 122.27, 118.95, 65.07 (q, *J* = 36.9 Hz), 52.68, 40.71, 36.86, 33.47, 21.45; <sup>19</sup>F NMR (565 MHz, CDCl<sub>3</sub>) δ = -73.92 (t, *J* = 8.2 Hz); HRMS (ESI) m/z: [M + H]<sup>+</sup> Calcd for C<sub>22</sub>H<sub>19</sub>F<sub>3</sub>NO<sub>4</sub><sup>+</sup> 418.1261; Found 418.1256.

**Methyl (1*S*,2*R*,3*R*)-2-benzoyl-6'-methyl-2'-(2,2,2-trifluoroethoxy)spiro[cyclopropane-1,3'-indole]-3-carboxylate (4ac):**

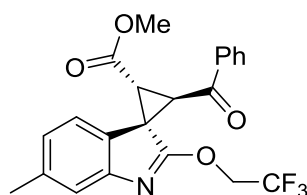

Following the general procedure, **4ac** was isolated by flash chromatography on silica (EtOAc/PE = 1/10) as a yellow liquid (54.3 mg, 65% yield, 4:1 dr); <sup>1</sup>H NMR (500 MHz, CDCl<sub>3</sub>) δ = 7.75 – 7.70 (m, 2H), 7.44 (t, *J* = 7.4 Hz, 1H), 7.32 (t, *J* = 7.7 Hz, 2H), 7.10 (s, 1H), 6.90 (d, *J* = 7.8 Hz, 1H), 6.76 (d, *J* = 7.7 Hz, 1H), 4.92 – 4.78 (m, 2H), 4.20 (d, *J* = 7.9 Hz, 1H), 3.67 (s, 3H), 3.62 (d, *J* = 7.9 Hz, 1H), 2.23 (s, 3H); <sup>13</sup>C NMR (151 MHz, CDCl<sub>3</sub>) δ = 190.76, 173.76, 166.48, 151.78, 138.78, 136.40, 133.89, 128.82, 128.33, 128.19, 125.11, 122.76 (q, *J* = 277.5 Hz), 121.23, 120.27, 65.10 (q, *J*

= 36.9 Hz), 52.66, 40.71, 36.71, 33.34, 21.58;  $^{19}\text{F}$  NMR (565 MHz,  $\text{CDCl}_3$ )  $\delta = -73.89$  (t,  $J = 8.2$  Hz); HRMS (ESI)  $m/z$ :  $[\text{M} + \text{H}]^+$  Calcd for  $\text{C}_{22}\text{H}_{19}\text{F}_3\text{NO}_4^+$  418.1261; Found 418.1252.

**Methyl (1*S*,2*R*,3*R*)-2-benzoyl-5'-methoxy-2'-(2,2,2-trifluoroethoxy)spiro[cyclopropane-1,3'-indole]-3-carboxylate (4ad):**

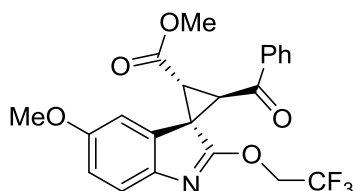

Following the general procedure, **4ad** was isolated by flash chromatography on silica (EtOAc/PE = 1/5) as a yellow solid (45.9 mg, 53% yield, 4:1 dr);  $^1\text{H}$  NMR (500 MHz,  $\text{CDCl}_3$ )  $\delta = 7.81$  (d,  $J = 7.6$  Hz, 2H), 7.53 (t,  $J = 7.4$  Hz, 1H), 7.41 (t,  $J = 7.7$  Hz, 2H), 7.25 (d,  $J = 8.7$  Hz, 1H), 6.77 (dd,  $J = 8.5, 2.4$  Hz, 1H), 6.70 (d,  $J = 2.3$  Hz, 1H), 4.96 – 4.84 (m, 2H), 4.29 (d,  $J = 7.9$  Hz, 1H), 3.76 (s, 3H), 3.74 (s, 3H), 3.68 (d,  $J = 7.9$  Hz, 1H).  $^{13}\text{C}$  NMR (151 MHz,  $\text{CDCl}_3$ )  $\delta = 190.52, 172.15, 166.37, 157.10, 144.88, 136.38, 133.94, 132.48, 128.83, 128.36, 122.78$  (q,  $J = 277.6$  Hz), 119.70, 113.81, 108.06, 65.03 (q,  $J = 36.8$  Hz), 55.70, 52.69, 40.88, 36.85, 33.65.  $^{19}\text{F}$  NMR (565 MHz,  $\text{CDCl}_3$ )  $\delta = -73.92$  (t,  $J = 8.3$  Hz); HRMS (ESI)  $m/z$ :  $[\text{M} + \text{H}]^+$  Calcd for  $\text{C}_{22}\text{H}_{19}\text{F}_3\text{NO}_5^+$  434.1210; Found 434.1200.

**Methyl (1*S*,2*R*,3*R*)-2-benzoyl-5'-chloro-2'-(2,2,2-trifluoroethoxy)spiro[cyclopropane-1,3'-indole]-3-carboxylate (4ae):**

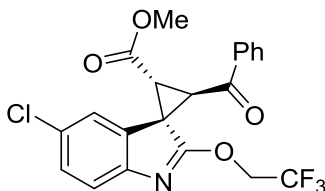

Following the general procedure, **4ae** was isolated by flash chromatography on silica (EtOAc/PE = 1/5) as a yellow liquid (55.2 mg, 63% yield, 5:1 dr);  $^1\text{H}$  NMR (500 MHz,  $\text{CDCl}_3$ )  $\delta = 7.73$  (d,  $J = 7.6$  Hz, 2H), 7.45 (d,  $J = 7.1$  Hz, 1H), 7.33 (t,  $J = 7.7$  Hz, 2H), 7.19 – 7.16 (m, 1H), 7.03 (d,  $J = 7.5$  Hz, 1H), 6.96 (t,  $J = 7.6$  Hz, 1H), 4.93 – 4.80 (m, 2H), 4.23 (d,  $J = 7.9$  Hz, 1H), 3.68 (s, 3H), 3.66 (s, 1H);  $^{13}\text{C}$  NMR (151 MHz,

CDCl<sub>3</sub>)  $\delta$  = 190.62, 173.60, 166.38, 151.65, 136.35, 133.95, 131.24, 128.83, 128.59, 128.33, 124.49, 122.74 (q,  $J$  = 277.5 Hz), 121.59, 119.39, 65.15 (q,  $J$  = 37.0 Hz), 52.70, 40.73, 36.85, 33.48; <sup>19</sup>F NMR (565 MHz, CDCl<sub>3</sub>)  $\delta$  = -73.90 (t,  $J$  = 8.2 Hz); HRMS (ESI)  $m/z$ : [M + H]<sup>+</sup> Calcd for C<sub>21</sub>H<sub>16</sub>ClF<sub>3</sub>NO<sub>4</sub><sup>+</sup> 438.0714; Found 438.0715.

**Methyl (1*S*,2*R*,3*R*)-2-benzoyl-6'-chloro-2'-(2,2,2-trifluoroethoxy)spiro[cyclopropane-1,3'-indole]-3-carboxylate (4af):**

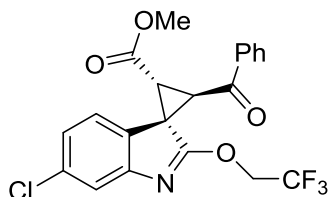

Following the general procedure, **4af** was isolated by flash chromatography on silica (EtOAc/PE = 1/10) as a white solid (54.3 mg, 62% yield, 4:1 dr); <sup>1</sup>H NMR (500 MHz, CDCl<sub>3</sub>)  $\delta$  = 7.72 (d,  $J$  = 7.3 Hz, 2H), 7.48 (t,  $J$  = 7.4 Hz, 1H), 7.35 (d,  $J$  = 7.9 Hz, 2H), 7.27 (d,  $J$  = 1.5 Hz, 1H), 6.97 – 6.93 (m, 2H), 4.92 – 4.78 (m, 2H), 4.23 (d,  $J$  = 7.9 Hz, 1H), 3.69 (s, 3H), 3.65 (d,  $J$  = 7.9 Hz, 1H); <sup>13</sup>C NMR (151 MHz, CDCl<sub>3</sub>)  $\delta$  = 190.48, 174.60, 166.10, 152.86, 136.18, 134.38, 134.14, 129.58, 128.92, 128.33, 124.44, 122.63 (q,  $J$  = 277.5 Hz), 122.44, 120.05, 65.30 (q,  $J$  = 37.0 Hz), 52.79, 40.48, 36.87, 33.62; <sup>19</sup>F NMR (565 MHz, CDCl<sub>3</sub>)  $\delta$  = -73.86 (t,  $J$  = 8.2 Hz); HRMS (ESI)  $m/z$ : [M + H]<sup>+</sup> Calcd for C<sub>21</sub>H<sub>16</sub>ClF<sub>3</sub>NO<sub>4</sub><sup>+</sup> 438.0714; Found 438.0709.

**Methyl (1*S*,2*R*,3*R*)-2-benzoyl-5'-bromo-2'-(2,2,2-trifluoroethoxy)spiro[cyclopropane-1,3'-indole]-3-carboxylate (4ag):**

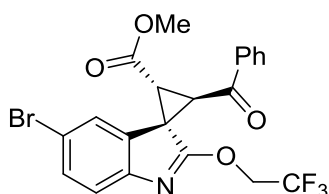

Following the general procedure, **4ag** was isolated by flash chromatography on silica (EtOAc/PE = 1/10) as a yellow solid (57.9 mg, 60% yield, 4:1 dr); <sup>1</sup>H NMR (600 MHz, CDCl<sub>3</sub>)  $\delta$  = 7.78 – 7.74 (m, 2H), 7.50 – 7.47 (m, 1H), 7.37 – 7.34 (m, 2H), 7.31 (dd,  $J$  = 8.2, 2.0 Hz, 1H), 7.21 (d,  $J$  = 2.0 Hz, 1H), 7.14 (d,  $J$  = 8.2 Hz, 1H), 4.90 – 4.78 (m, 2H), 4.24 (d,  $J$  = 8.0 Hz, 1H), 3.69 (s, 3H), 3.64 (s, 1H). <sup>13</sup>C NMR (151 MHz, CDCl<sub>3</sub>)  $\delta$  = 190.33, 173.65, 166.01, 150.72, 136.21, 134.15, 133.25, 131.66, 128.91,

128.43, 125.03, 122.63 (q,  $J = 277.4$  Hz), 120.74, 117.66, 65.27 (q,  $J = 37.1$  Hz), 52.82, 40.58, 36.90, 33.92.  $^{19}\text{F}$  NMR (565 MHz,  $\text{CDCl}_3$ )  $\delta = -73.87$  (t,  $J = 8.3$  Hz); HRMS (ESI)  $m/z$ :  $[\text{M} + \text{H}]^+$  Calcd for  $\text{C}_{21}\text{H}_{16}\text{BrF}_3\text{NO}_4^+$  482.0209; Found 482.0203.

**Methyl (1*S*,2*R*,3*R*)-2-benzoyl-6'-bromo-2'-(2,2,2-trifluoroethoxy)spiro[cycloprop-ane-1,3'-indole]-3-carboxylate (4ah):**

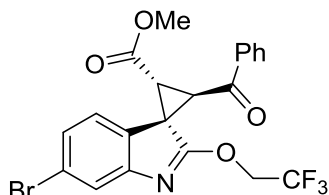

Following the general procedure, **4ah** was isolated by flash chromatography on silica (EtOAc/PE = 1/10) as a yellow liquid (63.6 mg, 66% yield, 4:1 dr);  $^1\text{H}$  NMR (600 MHz,  $\text{CDCl}_3$ )  $\delta = 7.80$  (d,  $J = 7.8$  Hz, 2H), 7.55 (t,  $J = 7.4$  Hz, 1H), 7.50 (s, 1H), 7.42 (t,  $J = 7.7$  Hz, 2H), 7.18 (d,  $J = 8.2$  Hz, 1H), 6.98 (d,  $J = 8.2$  Hz, 1H), 4.98 – 4.87 (m, 2H), 4.31 (d,  $J = 7.9$  Hz, 1H), 3.76 (s, 3H), 3.73 (d,  $J = 7.9$  Hz, 1H);  $^{13}\text{C}$  NMR (151 MHz,  $\text{CDCl}_3$ )  $\delta = 190.45, 174.46, 166.07, 153.04, 136.18, 134.15, 130.11, 128.92, 128.33, 127.32, 122.62$  (q,  $J = 277.5$  Hz), 122.92, 122.80, 122.24, 65.32 (q,  $J = 37.1$  Hz), 52.79, 40.55, 36.86, 33.60;  $^{19}\text{F}$  NMR (565 MHz,  $\text{CDCl}_3$ )  $\delta = -73.87$  (t,  $J = 8.2$  Hz); HRMS (ESI)  $m/z$ :  $[\text{M} + \text{H}]^+$  Calcd for  $\text{C}_{21}\text{H}_{16}\text{BrF}_3\text{NO}_4^+$  482.0209; Found 482.0201.

**Methyl (1*S*,2*R*,3*R*)-2-benzoyl-5'-fluoro-2'-(2,2,2-trifluoroethoxy)spiro[cycloprop-ane-1,3'-indole]-3-carboxylate (4ai):**

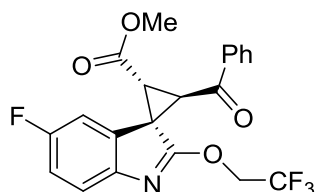

Following the general procedure, **4ai** was isolated by flash chromatography on silica (EtOAc/PE = 1/10) as a white solid (56.5 mg, 67% yield, 4:1 dr);  $^1\text{H}$  NMR (500 MHz,  $\text{CDCl}_3$ )  $\delta = 7.78 - 7.74$  (m, 2H), 7.49 (t,  $J = 7.4$  Hz, 1H), 7.36 (t,  $J = 7.8$  Hz, 2H), 7.21 (dd,  $J = 8.5, 4.6$  Hz, 1H), 6.87 (td,  $J = 9.1, 2.6$  Hz, 1H), 6.82 (dd,  $J = 8.5, 2.5$  Hz, 1H), 4.90 – 4.76 (m, 2H), 4.25 (d,  $J = 7.9$  Hz, 1H), 3.69 (s, 3H), 3.63 (d,  $J = 7.9$  Hz, 1H);  $^{13}\text{C}$  NMR (151 MHz,  $\text{CDCl}_3$ )  $\delta = 190.35, 173.23$  (d,  $J = 2.6$  Hz), 166.06, 160.07

(d,  $J = 242.8$  Hz), 147.61 (d,  $J = 2.4$  Hz), 136.24, 134.10, 132.83 (d,  $J = 10.1$  Hz), 128.89, 128.39, 122.69 (q,  $J = 277.4$  Hz), 120.02 (d,  $J = 8.8$  Hz), 115.11 (d,  $J = 23.6$  Hz), 109.86 (d,  $J = 26.9$  Hz), 65.17 (q,  $J = 37.1$  Hz), 52.76, 40.84 (d,  $J = 2.7$  Hz), 36.78, 33.85;  $^{19}\text{F}$  NMR (565 MHz,  $\text{CDCl}_3$ )  $\delta = -73.91$  (t,  $J = 8.2$  Hz),  $-116.75$  (td,  $J = 8.9, 4.6$  Hz); HRMS (ESI)  $m/z$ :  $[\text{M} + \text{H}]^+$  Calcd for  $\text{C}_{21}\text{H}_{16}\text{F}_4\text{NO}_4^+$  422.1010; Found 422.0997.

**Methyl (1*S*,2*R*,3*R*)-2-benzoyl-6'-fluoro-2'-(2,2,2-trifluoroethoxy)spiro[cyclopropane-1,3'-indole]-3-carboxylate (4aj):**

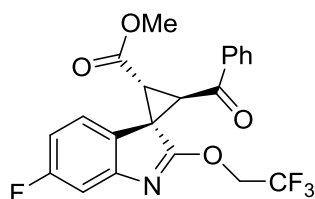

Following the general procedure, **4aj** was isolated by flash chromatography on silica (EtOAc/PE = 1/10) as a yellow solid (51.4 mg, 61% yield, 5:1 dr);  $^1\text{H}$  NMR (500 MHz,  $\text{CDCl}_3$ )  $\delta = 7.79$  (d,  $J = 7.5$  Hz, 2H), 7.54 (t,  $J = 7.4$  Hz, 1H), 7.41 (t,  $J = 7.7$  Hz, 2H), 7.15 – 7.02 (m, 2H), 6.73 (td,  $J = 9.2, 2.3$  Hz, 1H), 4.98 – 4.85 (m, 2H), 4.29 (d,  $J = 7.9$  Hz, 1H), 3.75 (s, 3H), 3.71 (d,  $J = 7.9$  Hz, 1H);  $^{13}\text{C}$  NMR (151 MHz,  $\text{CDCl}_3$ )  $\delta = 190.63, 174.94, 166.19, 163.34$  (d,  $J = 245.4$  Hz), 153.14 (d,  $J = 11.8$  Hz), 136.27, 134.08, 128.89, 128.32, 126.68 (d,  $J = 2.7$  Hz), 122.64 (q,  $J = 277.3$  Hz), 122.51 (d,  $J = 9.7$  Hz), 111.06 (d,  $J = 22.8$  Hz), 107.63 (d,  $J = 24.8$  Hz), 65.28 (q,  $J = 37.0$  Hz), 52.76, 40.43, 36.74, 33.53;  $^{19}\text{F}$  NMR (565 MHz,  $\text{CDCl}_3$ )  $\delta = -73.88$  (t,  $J = 8.1$  Hz),  $-112.41$  (td,  $J = 9.2, 5.3$  Hz); HRMS (ESI)  $m/z$ :  $[\text{M} + \text{Na}]^+$  Calcd for  $\text{C}_{21}\text{H}_{15}\text{F}_4\text{NNaO}_4^+$  444.0829; Found 444.0823.

**Methyl (1*S*,2*R*,3*R*)-2-benzoyl-5',7'-dichloro-2'-(2,2,2-trifluoroethoxy)spiro[cyclopropane-1,3'-indole]-3-carboxylate (4ak):**

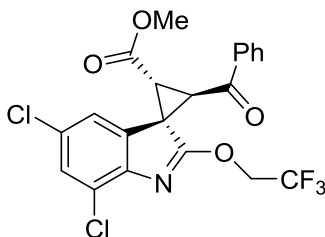

Following the general procedure, **4ak** was isolated by flash chromatography on silica

(EtOAc/PE = 1/10) as a white solid (36.8 mg, 39% yield, 4:1 dr);  $^1\text{H}$  NMR (500 MHz,  $\text{CDCl}_3$ )  $\delta$  = 7.83 (d,  $J$  = 7.4 Hz, 2H), 7.59 (t,  $J$  = 7.4 Hz, 1H), 7.45 (t,  $J$  = 7.8 Hz, 2H), 7.28 (d,  $J$  = 1.8 Hz, 1H), 7.05 (d,  $J$  = 1.8 Hz, 1H), 5.06 – 4.91 (m, 2H), 4.35 (d,  $J$  = 8.1 Hz, 1H), 3.77 (s, 3H), 3.74 (d,  $J$  = 8.1 Hz, 1H);  $^{13}\text{C}$  NMR (151 MHz,  $\text{CDCl}_3$ )  $\delta$  = 189.97, 174.18, 165.63, 147.31, 136.01, 134.35, 133.98, 130.44, 129.00, 128.95, 128.46, 124.78, 122.55 (q,  $J$  = 277.2 Hz), 120.78, 65.65 (q,  $J$  = 37.1 Hz), 52.92, 41.15, 37.28, 34.27;  $^{19}\text{F}$  NMR (565 MHz,  $\text{CDCl}_3$ )  $\delta$  = -73.84 (t,  $J$  = 8.1 Hz); HRMS (ESI)  $m/z$ :  $[\text{M} + \text{H}]^+$  Calcd for  $\text{C}_{21}\text{H}_{15}\text{Cl}_2\text{F}_3\text{NO}_4^+$  472.0325; Found 472.0327.

**((2*R*,3*R*)-2'-(2,2,2-trifluoroethoxy)spiro[cyclopropane-1,3'-indole]-2,3-diyl)bis(phenylmethanone) (4al):**

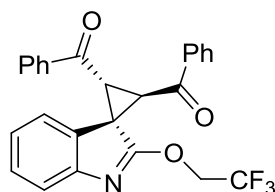

Following the general procedure, **4al** was isolated by flash chromatography on silica (EtOAc/PE = 1/10) as a yellow solid (39.5 mg, 44% yield, >20:1 dr); mp 60-61 °C;  $^1\text{H}$  NMR (500 MHz,  $\text{CDCl}_3$ )  $\delta$  = 7.88 (d,  $J$  = 7.4 Hz, 2H), 7.75 (d,  $J$  = 7.3 Hz, 2H), 7.54 (q,  $J$  = 7.1 Hz, 2H), 7.42 (t,  $J$  = 7.7 Hz, 2H), 7.40 – 7.36 (m, 3H), 7.32 (t,  $J$  = 7.1 Hz, 2H), 7.13 (t,  $J$  = 7.6 Hz, 1H), 4.84 – 4.78 (m, 1H), 4.58 – 4.50 (m, 2H), 4.34 (d,  $J$  = 8.0 Hz, 1H);  $^{13}\text{C}$  NMR (151 MHz,  $\text{CDCl}_3$ )  $\delta$  = 191.35, 190.05, 173.70, 152.03, 136.54, 135.70, 133.96, 133.90, 130.99, 128.84, 128.73, 128.46, 128.42, 124.64, 122.45 (q,  $J$  = 277.8 Hz), 121.66, 119.51, 64.79 (q,  $J$  = 37.1 Hz), 41.88, 38.30, 36.40;  $^{19}\text{F}$  NMR (565 MHz,  $\text{CDCl}_3$ )  $\delta$  = -74.02 (t,  $J$  = 8.2 Hz); HRMS (ESI)  $m/z$ :  $[\text{M} + \text{H}]^+$  Calcd for  $\text{C}_{26}\text{H}_{19}\text{F}_3\text{NO}_3^+$  450.1312; Found 450.1315.

**((1*S*,2*R*,3*R*)-2-benzoyl-2'-(2,2,2-trifluoroethoxy)spiro[cyclopropane-1,3'-indol]-3-yl)(thiophen-2-yl)methanone (4am):**

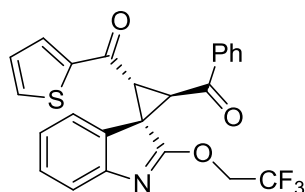



Following the general procedure, **4am** was isolated by flash chromatography on silica (EtOAc/PE = 1/10) as a yellow solid (47.4 mg, 52% yield, 3:1 dr); <sup>1</sup>H NMR (600 MHz, CDCl<sub>3</sub>) δ = 7.81 – 7.79 (m, 2H), 7.56 (dd, *J* = 4.9, 1.2 Hz, 1H), 7.48 (t, *J* = 7.4 Hz, 1H), 7.37 – 7.34 (m, 2H), 7.31 (d, *J* = 7.6 Hz, 1H), 7.29 (dd, *J* = 3.8, 1.2 Hz, 1H), 7.25 – 7.19 (m, 2H), 7.05 (dd, *J* = 7.6, 1.1 Hz, 1H), 6.94 (dd, *J* = 4.9, 3.8 Hz, 1H), 4.81 – 4.74 (m, 1H), 4.59 – 4.52 (m, 1H), 4.43 (d, *J* = 7.9 Hz, 1H), 4.24 (d, *J* = 8.0 Hz, 1H); <sup>13</sup>C NMR (151 MHz, CDCl<sub>3</sub>) δ = 191.10, 182.71, 173.63, 151.95, 142.93, 136.45, 134.81, 134.00, 133.05, 131.10, 128.86, 128.72, 128.47, 128.37, 124.63, 122.48 (q, *J* = 278.0 Hz), 121.60, 119.50, 64.86 (q, *J* = 36.8 Hz), 41.85, 38.69, 36.32; <sup>19</sup>F NMR (565 MHz, CDCl<sub>3</sub>) δ = -74.02 (t, *J* = 8.0 Hz); HRMS (ESI) *m/z*: [M + H]<sup>+</sup> Calcd for C<sub>24</sub>H<sub>17</sub>F<sub>3</sub>NO<sub>3</sub>S<sup>+</sup> 456.0876; Found 456.0882.

**1-((1*R*,2*R*,3*R*)-2-benzoyl-2'-(2,2,2-trifluoroethoxy)spiro[cyclopropane-1,3'-indol]-3-yl)ethan-1-one (4an):**

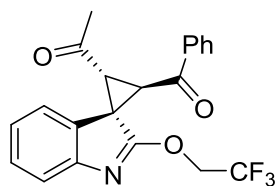

Following the general procedure, **4an** was isolated by flash chromatography on silica (EtOAc/PE = 1/10) as a yellow solid (31.0 mg, 40% yield, 5:1 dr); <sup>1</sup>H NMR (600 MHz, CDCl<sub>3</sub>) δ = 7.73 (d, *J* = 7.0 Hz, 2H), 7.46 (d, *J* = 7.4 Hz, 1H), 7.34 – 7.29 (m, 3H), 7.09 (d, *J* = 7.5 Hz, 1H), 6.99 (td, *J* = 7.6, 1.1 Hz, 1H), 4.92 – 4.81 (m, 2H), 4.29 (d, *J* = 8.1 Hz, 1H), 3.77 (d, *J* = 8.0 Hz, 1H), 2.19 (s, 3H); <sup>13</sup>C NMR (151 MHz, CDCl<sub>3</sub>) δ = 197.75, 190.98, 173.59, 151.67, 136.38, 133.96, 131.36, 128.83, 128.61, 128.36, 124.51, 122.67 (q, *J* = 277.8 Hz), 121.55, 119.44, 64.87 (q, *J* = 37.0 Hz), 41.42, 40.84, 36.56, 30.25; <sup>19</sup>F NMR (565 MHz, CDCl<sub>3</sub>) δ = -73.90 (t, *J* = 8.0 Hz); HRMS (ESI) *m/z*: [M + Na]<sup>+</sup> Calcd for C<sub>21</sub>H<sub>16</sub>F<sub>3</sub>NNaO<sub>3</sub><sup>+</sup> 410.0974; Found 410.0976.

**Phenyl ((1*R*,2*S*,3*R*)-2-(*p*-tolyl)-2'-(2,2,2-trifluoroethoxy)spiro[cyclopropane-1,3'-indol]-3-yl)methanone (4ao):**

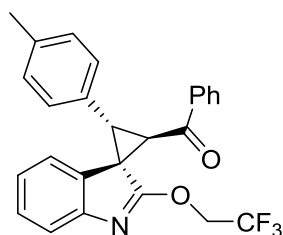

Following the general procedure, **4ao** was isolated by flash chromatography on silica (EtOAc/PE = 1/10) as a yellow solid (49.6 mg, 57% yield, >20:1 dr); mp 77-78 °C; <sup>1</sup>H NMR (600 MHz, CDCl<sub>3</sub>) δ = 7.77 (d, *J* = 7.3 Hz, 2H), 7.46 (t, *J* = 7.4 Hz, 1H), 7.34 (t, *J* = 7.8 Hz, 2H), 7.30 (d, *J* = 7.8 Hz, 1H), 7.20 – 7.16 (m, 2H), 7.06 (d, *J* = 8.0 Hz, 2H), 7.04 – 6.98 (m, 3H), 4.78 – 4.71 (m, 1H), 4.41 – 4.35 (m, 1H), 4.25 (d, *J* = 8.3 Hz, 1H), 4.20 (d, *J* = 8.3 Hz, 1H), 2.25 (s, 3H); <sup>13</sup>C NMR (151 MHz, CDCl<sub>3</sub>) δ = 192.26, 174.59, 151.70, 137.42, 136.96, 133.67, 132.94, 130.45, 128.95, 128.83, 128.67, 128.24, 127.71, 124.10, 122.55 (q, *J* = 277.5 Hz), 121.37, 119.07, 64.65 (q, *J* = 36.8 Hz), 43.15, 38.95, 37.86, 21.09; <sup>19</sup>F NMR (565 MHz, CDCl<sub>3</sub>) δ = -74.18 (t, *J* = 8.3 Hz); HRMS (ESI) *m/z*: [M + H]<sup>+</sup> Calcd for C<sub>26</sub>H<sub>21</sub>F<sub>3</sub>NO<sub>2</sub><sup>+</sup> 436.1519; Found 436.1517.

**Methyl (1*S*,2*R*,3*R*)-2-benzoyl-2'-(2,2-difluoroethoxy)spiro[cyclopropane-1,3'-indole]-3-carboxylate (**4ap**):**

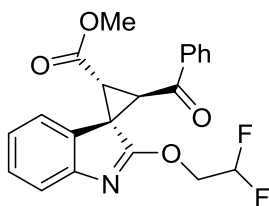

Following the general procedure, **4ap** was isolated by flash chromatography on silica (EtOAc/PE = 1/10) as a yellow liquid (37.8 mg, 49% yield, 3:1 dr); <sup>1</sup>H NMR (500 MHz, CDCl<sub>3</sub>) δ = 7.83 – 7.78 (m, 2H), 7.53 (t, *J* = 7.4 Hz, 1H), 7.40 (t, *J* = 7.8 Hz, 2H), 7.35 (d, *J* = 7.7 Hz, 1H), 7.23 (dd, *J* = 7.6, 1.2 Hz, 1H), 7.09 (d, *J* = 7.1 Hz, 1H), 7.02 (td, *J* = 7.6, 0.9 Hz, 1H), 6.18 (tt, *J* = 55.0, 4.0 Hz, 1H), 4.82 – 4.62 (m, 2H), 4.28 (d, *J* = 7.9 Hz, 1H), 3.76 (s, 3H), 3.72 (d, *J* = 7.9 Hz, 1H); <sup>13</sup>C NMR (151 MHz, CDCl<sub>3</sub>) δ = 190.76, 174.12, 166.58, 152.07, 136.38, 133.92, 131.17, 128.82, 128.54, 128.36, 124.27, 121.53, 119.23, 112.32 (t, *J* = 241.5 Hz), 67.17 (t, *J* = 29.7 Hz), 52.71,

40.82, 36.86, 33.50;  $^{19}\text{F}$  NMR (565 MHz,  $\text{CDCl}_3$ )  $\delta = -126.23$  (td,  $J = 13.4, 5.6$  Hz),  $-126.33$  (td,  $J = 13.4, 5.7$  Hz); HRMS (ESI)  $m/z$ :  $[\text{M} + \text{H}]^+$  Calcd for  $\text{C}_{21}\text{H}_{18}\text{F}_2\text{NO}_4^+$  386.1198; Found 386.1201.

**Methyl (1*S*,2*R*,3*R*)-2-benzoyl-2'-methoxyspiro[cyclopropane-1,3'-indole]-3-carboxylate (4aq):**

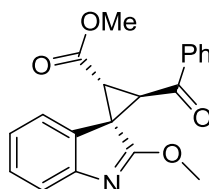

Following the general procedure, **4aq** was isolated by flash chromatography on silica (EtOAc/PE = 1/10) as a yellow solid (31.5 mg, 47% yield, >20:1 dr); mp 55-56 °C;  $^1\text{H}$  NMR (500 MHz,  $\text{CDCl}_3$ )  $\delta = 7.81$  (d,  $J = 7.4$  Hz, 2H), 7.52 (t,  $J = 7.5$  Hz, 1H), 7.39 (t,  $J = 7.8$  Hz, 2H), 7.36 (d,  $J = 7.7$  Hz, 1H), 7.22 (t,  $J = 7.6$  Hz, 1H), 7.06 (d,  $J = 7.4$  Hz, 1H), 6.98 (t,  $J = 7.5$  Hz, 1H), 4.22 (d,  $J = 7.8$  Hz, 1H), 4.14 (s, 3H), 3.74 (s, 3H), 3.67 (d,  $J = 7.8$  Hz, 1H);  $^{13}\text{C}$  NMR (151 MHz,  $\text{CDCl}_3$ )  $\delta = 191.10, 175.76, 166.94, 152.86, 136.50, 133.82, 131.03, 128.77, 128.45, 128.38, 123.70, 121.35, 118.86, 56.92, 52.60, 41.04, 36.92, 33.42$ ; HRMS (ESI)  $m/z$ :  $[\text{M} + \text{H}]^+$  Calcd for  $\text{C}_{20}\text{H}_{18}\text{NO}_4^+$  336.1230; Found 336.1226.

**Methyl (1*S*,2*R*,3*R*)-2-benzoyl-2'-ethoxyspiro[cyclopropane-1,3'-indole]-3-carboxylate (4ar):**

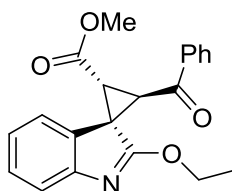

Following the general procedure, **4ar** was isolated by flash chromatography on silica (EtOAc/PE = 1/10) as a yellow solid (24.4 mg, 35% yield, >20:1 dr); mp 102-103 °C;  $^1\text{H}$  NMR (500 MHz,  $\text{CDCl}_3$ )  $\delta = 7.74$  (d,  $J = 7.4$  Hz, 2H), 7.44 (d,  $J = 7.4$  Hz, 1H), 7.33 (t,  $J = 7.8$  Hz, 2H), 7.27 (d,  $J = 7.6$  Hz, 1H), 7.15 (t,  $J = 7.3$  Hz, 1H), 6.98 (d,  $J = 7.3$  Hz, 1H), 6.90 (t,  $J = 7.6$  Hz, 1H), 4.55 – 4.46 (m, 2H), 4.14 (d,  $J = 7.8$  Hz, 1H), 3.68 (s, 3H), 3.61 (d,  $J = 7.8$  Hz, 1H), 1.38 (t,  $J = 7.1$  Hz, 3H);  $^{13}\text{C}$  NMR (151 MHz,

CDCl<sub>3</sub>)  $\delta$  = 191.22, 175.10, 166.85, 153.19, 136.56, 133.77, 130.85, 128.76, 128.40, 128.36, 123.53, 121.27, 118.74, 65.75, 52.45, 40.95, 36.92, 33.35, 14.40; HRMS (ESI)  $m/z$ : [M + H]<sup>+</sup> Calcd for C<sub>21</sub>H<sub>20</sub>NO<sub>4</sub><sup>+</sup> 350.1387; Found 350.1387.

**Methyl (1S,2R,3R)-2-benzoyl-2'-propoxyspiro[cyclopropane-1,3'-indole]-3-carboxylate (4as):**

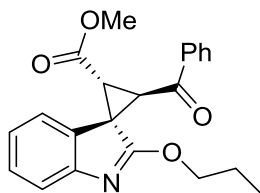

Following the general procedure, **4as** was isolated by flash chromatography on silica (EtOAc/PE = 1/10) as a yellow solid (21.1 mg, 29% yield, >20:1 dr); mp 85-86 °C; <sup>1</sup>H NMR (500 MHz, CDCl<sub>3</sub>)  $\delta$  = 7.82 – 7.78 (m, 2H), 7.52 (td,  $J$  = 7.3, 1.3 Hz, 1H), 7.40 (t,  $J$  = 7.8 Hz, 2H), 7.36 – 7.32 (m, 1H), 7.22 (td,  $J$  = 7.6, 1.3 Hz, 1H), 7.07 – 7.03 (m, 1H), 6.97 (td,  $J$  = 7.6, 1.1 Hz, 1H), 4.51 – 4.43 (m, 2H), 4.21 (d,  $J$  = 7.8 Hz, 1H), 3.75 (s, 3H), 3.68 (d,  $J$  = 7.8 Hz, 1H), 1.88 – 1.81 (m, 2H), 1.07 (t,  $J$  = 7.4 Hz, 3H); <sup>13</sup>C NMR (151 MHz, CDCl<sub>3</sub>)  $\delta$  = 191.20, 175.27, 166.82, 153.17, 136.57, 133.76, 130.84, 128.76, 128.41, 128.33, 123.52, 121.26, 118.73, 71.49, 52.50, 41.16, 37.03, 33.32, 22.20, 10.32; HRMS (ESI)  $m/z$ : [M + H]<sup>+</sup> Calcd for C<sub>22</sub>H<sub>22</sub>NO<sub>4</sub><sup>+</sup> 364.1543; Found 364.1545.

**Methyl (1S,2R,3R)-2-benzoyl-2'-butoxyspiro[cyclopropane-1,3'-indole]-3-carboxylate (4at):**

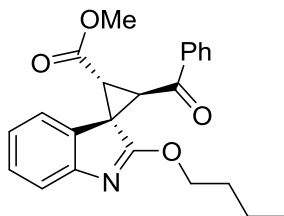

Following the general procedure, **4at** was isolated by flash chromatography on silica (EtOAc/PE = 1/10) as a yellow solid (22.6 mg, 30% yield, >20:1 dr); mp 74-75 °C; <sup>1</sup>H NMR (500 MHz, CDCl<sub>3</sub>)  $\delta$  = 7.80 (d,  $J$  = 7.5 Hz, 2H), 7.52 (t,  $J$  = 7.3 Hz, 1H), 7.40 (t,  $J$  = 7.7 Hz, 2H), 7.34 (d,  $J$  = 7.7 Hz, 1H), 7.21 (t,  $J$  = 7.6 Hz, 1H), 7.05 (d,  $J$  = 7.5 Hz, 1H), 6.97 (t,  $J$  = 7.5 Hz, 1H), 4.51 (t,  $J$  = 6.6 Hz, 2H), 4.20 (d,  $J$  = 7.8 Hz, 1H), 3.75 (s,

3H), 3.68 (d,  $J = 7.8$  Hz, 1H), 1.80 (p,  $J = 6.8$  Hz, 2H), 1.51 (dq,  $J = 14.1, 7.0$  Hz, 2H), 1.01 (t,  $J = 7.4$  Hz, 3H);  $^{13}\text{C}$  NMR (151 MHz,  $\text{CDCl}_3$ )  $\delta = 190.18, 174.26, 165.78, 152.14, 135.54, 132.74, 129.81, 127.73, 127.39, 127.31, 122.49, 120.24, 117.70, 68.71, 51.47, 40.12, 36.01, 32.28, 29.78, 17.97, 12.70$ ; HRMS (ESI)  $m/z$ :  $[\text{M} + \text{H}]^+$  Calcd for  $\text{C}_{23}\text{H}_{24}\text{NO}_4^+$  378.1700; Found 378.1694.

**Methyl (1S,2R,3R)-2-benzoyl-2'-isopropoxyspiro[cyclopropane-1,3'-indole]-3-carboxylate (4au):**

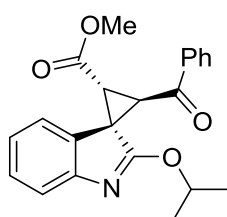

Following the general procedure, **4au** was isolated by flash chromatography on silica (EtOAc/PE = 1/10) as a white solid (16.0 mg, 22% yield, >20:1 dr); mp 122-123 °C;  $^1\text{H}$  NMR (500 MHz,  $\text{CDCl}_3$ )  $\delta = 8.13$  (dd,  $J = 7.2, 2.1$  Hz, 2H), 7.76 (d,  $J = 7.7$  Hz, 1H), 7.65 (d,  $J = 7.6$  Hz, 1H), 7.54 – 7.49 (m, 3H), 7.41 (t,  $J = 7.5$  Hz, 1H), 7.30 (t,  $J = 7.8$  Hz, 1H), 5.20 – 5.12 (m, 2H), 3.82 (s, 3H), 3.71 (d,  $J = 5.2$  Hz, 1H), 1.52 (d,  $J = 5.2$  Hz, 1H), 1.35 (d,  $J = 6.3$  Hz, 3H), 1.25 (d,  $J = 6.2$  Hz, 3H);  $^{13}\text{C}$  NMR (151 MHz,  $\text{CDCl}_3$ )  $\delta = 171.40, 166.14, 160.06, 141.13, 137.71, 131.12, 130.57, 128.71, 128.64, 127.92, 127.42, 126.34, 121.93, 69.85, 52.78, 39.59, 28.38, 26.33, 21.79, 21.55$ ; HRMS (ESI)  $m/z$ :  $[\text{M} + \text{H}]^+$  Calcd for  $\text{C}_{22}\text{H}_{22}\text{NO}_4^+$  364.1543; Found 364.1540.

### III. Synthetic Procedures and Analytical Data of Compounds 6:

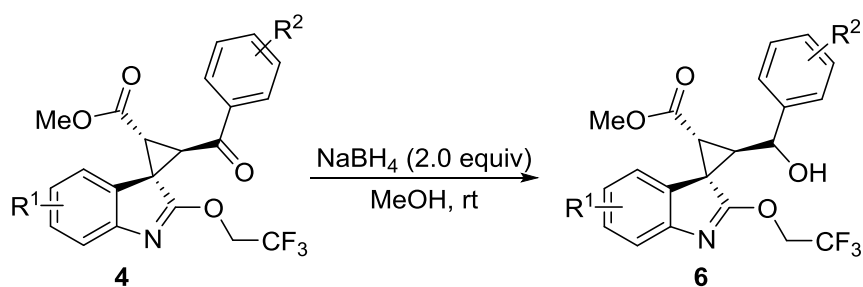

In a flame-dried Schlenk tube, sodium borohydride (22.8 mg, 0.6 mmol) was suspended in methanol (1.5 mL). Compound **4** (0.2 mmol) dissolved in methanol (1.5 mL) was added via syringe and stirred for 3 h at room temperature and monitored by TLC analysis. After quenching with sat. NaHCO<sub>3</sub> (5.0 mL) the aqueous layer was extracted with DCM (5.0 mL × 3). The combined organic layers were dried over Na<sub>2</sub>SO<sub>4</sub> and the crude product was purified by column chromatography (MeOH/DCM = 1:30) to give the separable pure products **6**.

#### Methyl (1*S*,2*R*,3*R*)-3-((*R*)-hydroxy(phenyl)methyl)-2'-(2,2,2-trifluoroethoxy)spiro [cyclopropane-1,3'-indole]-2-carboxylate (**6a**):

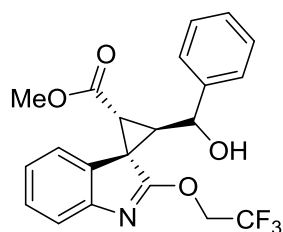

Following the general procedure, **6a** was isolated by flash chromatography on silica (MeOH/DCM = 1:30) as a colorless solid (59.2 mg, 73% yield, >20:1 dr); mp 179-181 °C; <sup>1</sup>H NMR (600 MHz, CDCl<sub>3</sub>) δ = 7.48 (d, *J* = 7.3 Hz, 2H), 7.45 (d, *J* = 7.7 Hz, 1H), 7.38 – 7.32 (m, 3H), 7.29 (t, *J* = 7.4 Hz, 1H), 7.17 (s, 1H), 7.16 – 7.12 (m, 1H), 4.86 (d, *J* = 9.4 Hz, 1H), 4.74 – 4.67 (m, 1H), 4.08 – 4.01 (m, 1H), 3.57 (s, 3H), 3.09 (dd, *J* = 9.4, 8.4 Hz, 1H), 2.87 (d, *J* = 8.3 Hz, 1H), 2.75 (s, 1H); <sup>13</sup>C NMR (151 MHz, CDCl<sub>3</sub>) δ = 175.17, 166.39, 152.03, 141.23, 132.71, 128.89, 128.58, 128.40, 126.13, 124.04, 122.53 (q, *J* = 277.2 Hz), 120.23, 119.82, 71.34, 64.93 (q, *J* = 36.9 Hz), 52.51, 40.09, 39.04, 35.85; <sup>19</sup>F NMR (565 MHz, CDCl<sub>3</sub>) δ = -73.79 (t, *J* = 8.2 Hz); HRMS (ESI) *m/z*: [M + Na]<sup>+</sup> Calcd for C<sub>21</sub>H<sub>18</sub>F<sub>3</sub>NNaO<sub>4</sub><sup>+</sup> 428.1080; Found

428.1071.

**Methyl (1*S*,2*R*,3*R*)-2-((*R*)-[1,1'-biphenyl]-4-yl(hydroxy)methyl)-2'-(2,2,2-trifluoroethoxy)spiro[cyclopropane-1,3'-indole]-3-carboxylate (6b):**

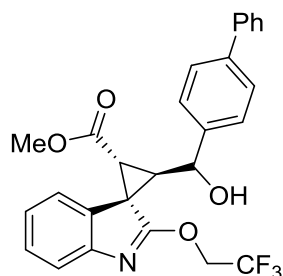

Following the general procedure, **6b** was isolated by flash chromatography on silica (MeOH/DCM = 1:30) as a colorless solid (85.7 mg, 89% yield, dr = 7:1); <sup>1</sup>H NMR (500 MHz, CDCl<sub>3</sub>) δ = 7.64 (dd, *J* = 17.5, 6.3 Hz, 6H), 7.57 (d, *J* = 7.8 Hz, 1H), 7.45 (q, *J* = 9.4, 8.5 Hz, 3H), 7.38 (d, *J* = 7.3 Hz, 1H), 7.28 – 7.23 (m, 2H), 4.98 (d, *J* = 9.5 Hz, 1H), 4.71 – 4.63 (m, 1H), 3.75 (dd, *J* = 11.6, 8.6 Hz, 1H), 3.63 (s, 4H), 3.21 (t, *J* = 8.9 Hz, 1H), 2.98 (d, *J* = 8.3 Hz, 1H); <sup>13</sup>C NMR (151 MHz, CDCl<sub>3</sub>) δ = 175.24, 166.35, 151.90, 141.27, 140.66, 140.31, 132.65, 128.85, 128.71, 127.63, 127.48, 127.14, 126.62, 124.08, 122.44 (q, *J* = 277.0 Hz), 120.36, 119.77, 71.00, 64.90 (q, *J* = 36.9 Hz), 52.59, 40.29, 39.16, 35.88; <sup>19</sup>F NMR (565 MHz, CDCl<sub>3</sub>) δ = -73.70 (t, *J* = 8.2 Hz); HRMS (ESI) *m/z*: [M + Na]<sup>+</sup> Calcd for C<sub>27</sub>H<sub>22</sub>F<sub>3</sub>NNaO<sub>4</sub><sup>+</sup> 504.1393; Found 504.1381.

**Methyl (1*S*,2*R*,3*R*)-3-((*R*)-(4-chlorophenyl)(hydroxy)methyl)-2'-(2,2,2-trifluoroethoxy)spiro[cyclopropane-1,3'-indole]-2-carboxylate (6c):**

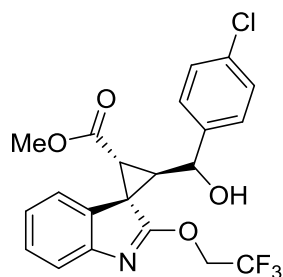

Following the general procedure, **6c** was isolated by flash chromatography on silica (MeOH/DCM = 1:20) as a colorless solid (72.1 mg, 82% yield, dr > 20:1); mp 147-148 °C; <sup>1</sup>H NMR (500 MHz, CDCl<sub>3</sub>) δ = 7.45 (dd, *J* = 12.1, 8.1 Hz, 3H), 7.35 (t,

$J = 8.1$  Hz, 3H), 7.16 (d,  $J = 6.4$  Hz, 2H), 4.84 (d,  $J = 9.4$  Hz, 1H), 4.61 (td,  $J = 8.3$ , 4.0 Hz, 1H), 3.78 (p,  $J = 8.3$  Hz, 1H), 3.57 (s, 3H), 3.28 (s, 1H), 3.01 (t,  $J = 8.9$  Hz, 1H), 2.87 (d,  $J = 8.3$  Hz, 1H);  $^{13}\text{C}$  NMR (151 MHz,  $\text{CDCl}_3$ )  $\delta = 175.02$ , 166.28, 152.07, 139.65, 134.19, 132.47, 129.05, 128.71, 127.46, 124.14, 122.52 (q,  $J = 278.3$  Hz), 120.11, 119.91, 70.77, 64.97 (q,  $J = 37.2$  Hz), 52.62, 39.88, 38.86, 35.78;  $^{19}\text{F}$  NMR (565 MHz,  $\text{CDCl}_3$ )  $\delta = -73.81$  (t,  $J = 8.3$  Hz); HRMS (ESI)  $m/z$ :  $[\text{M} + \text{H}]^+$  Calcd for  $\text{C}_{21}\text{H}_{18}\text{ClF}_3\text{NO}_4^+$  440.0871; Found 440.0872.

**Methyl (1*S*,2*R*,3*R*)-6'-chloro-3-((*R*)-hydroxy(phenyl)methyl)-2'-(2,2,2-trifluoroethoxy)spiro[cyclopropane-1,3'-indole]-2-carboxylate (6d):**

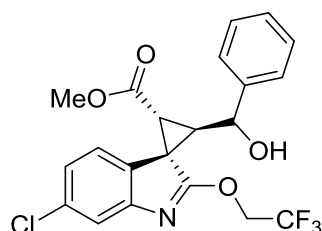

Following the general procedure, **6d** was isolated by flash chromatography on silica (MeOH/DCM = 1:20) as a colorless solid (71.2 mg, 81% yield, dr > 20:1); mp 175-176 °C;  $^1\text{H}$  NMR (500 MHz,  $\text{CDCl}_3$ )  $\delta = 7.48$  (d,  $J = 7.4$  Hz, 2H), 7.41 (dd,  $J = 14.1$ , 6.9 Hz, 3H), 7.35 (t,  $J = 7.2$  Hz, 1H), 7.16 (s, 2H), 4.94 – 4.85 (m, 2H), 4.51 (dq,  $J = 12.4$ , 8.2 Hz, 1H), 3.65 (s, 3H), 3.13 (t,  $J = 8.8$  Hz, 1H), 2.94 (d,  $J = 8.4$  Hz, 1H), 2.17 (s, 1H);  $^{13}\text{C}$  NMR (151 MHz,  $\text{CDCl}_3$ )  $\delta = 176.10$ , 166.30, 153.32, 141.04, 134.12, 131.27, 128.97, 128.58, 126.08, 123.95, 122.55 (q,  $J = 277.3$  Hz), 121.03, 120.42, 71.53, 65.17 (q,  $J = 37.0$  Hz), 52.62, 39.91, 38.80, 35.83;  $^{19}\text{F}$  NMR (565 MHz,  $\text{CDCl}_3$ )  $\delta = -73.82$  (t,  $J = 8.3$  Hz); HRMS (ESI)  $m/z$ :  $[\text{M} + \text{H}]^+$  Calcd for  $\text{C}_{21}\text{H}_{18}\text{ClF}_3\text{NO}_4^+$  440.0871; Found 440.0867.



#### IV. Synthetic Procedures and Analytical Data of Compounds 7:

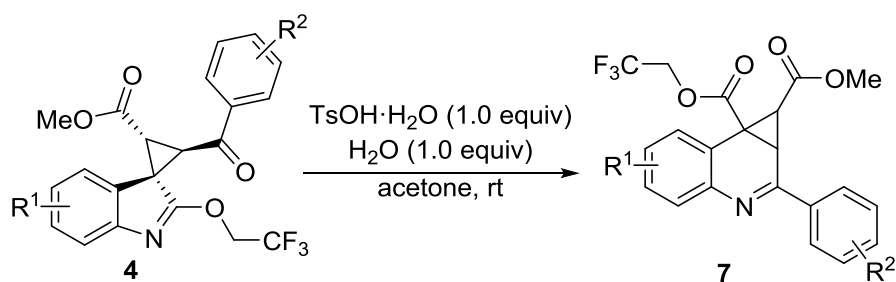

To a mixture compound of **4** (0.20 mmol) in acetone (2.0 mL), *p*-TsOH  $\text{H}_2\text{O}$  (32 mg, 0.20 mmol) and water (36  $\mu\text{L}$ , 0.20 mmol) was added. The reaction mixture was stirred for 0.5 h and monitored by TLC analysis. After the reaction was completed, the reaction mixture was extracted with DCM (5.0 mL  $\times$  3). The combined organic layers were dried over  $\text{Na}_2\text{SO}_4$ , filtered and concentrated under reduced pressure to yield the corresponding crude product, which was purified by column chromatography (ethyl acetate/petroleum ether = 1:10) to give the separable pure products **7**.

#### 1-Methyl 7b-(2,2,2-trifluoroethyl) (1*R*,1*aR*,7*bS*)-2-phenyl-1,1*a*-dihydro-7*bH*-cyclopropa[*c*]quinoline-1,7*b*-dicarboxylate (**7a**):

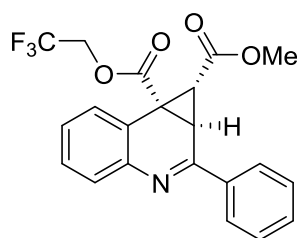

Following the general procedure, **7a** was isolated by flash chromatography on silica (EtOAc/PE = 1/10) as a yellow solid (65.3 mg, 81% yield); mp 80-82  $^{\circ}\text{C}$ ;  $^1\text{H}$  NMR (600 MHz,  $\text{CDCl}_3$ )  $\delta$  = 8.12 (dd,  $J$  = 7.7, 1.8 Hz, 2H), 7.69 (ddd,  $J$  = 27.2, 7.8, 1.1 Hz, 2H), 7.55 – 7.49 (m, 3H), 7.43 (td,  $J$  = 7.6, 1.3 Hz, 1H), 7.32 (td,  $J$  = 7.6, 1.2 Hz, 1H), 4.63 – 4.53 (m, 2H), 3.82 (s, 3H), 3.75 (d,  $J$  = 5.3 Hz, 1H), 1.60 (d,  $J$  = 5.3 Hz, 1H);  $^{13}\text{C}$  NMR (151 MHz,  $\text{CDCl}_3$ )  $\delta$  = 171.47, 165.31, 159.42, 141.01, 137.44, 131.31, 130.81, 129.17, 128.71, 128.20, 127.36, 126.19, 122.73 (q,  $J$  = 277.2 Hz), 120.42, 61.61 (q,  $J$  = 37.0 Hz), 53.04, 38.59, 28.40, 26.20;  $^{19}\text{F}$  NMR (565 MHz,  $\text{CDCl}_3$ )  $\delta$  =

-73.32 (t,  $J = 8.4$  Hz); HRMS (ESI)  $m/z$ :  $[M + H]^+$  Calcd for  $C_{21}H_{17}F_3NO_4^+$  404.1104; Found 404.1106.

**1-Methyl 7b-(2,2,2-trifluoroethyl) (1*R*,1*aR*,7*bS*)-2-phenyl-1,1*a*-dihydro-7*bH*-cyclopropa[*c*]quinoline-1,7*b*-dicarboxylate (7b):**

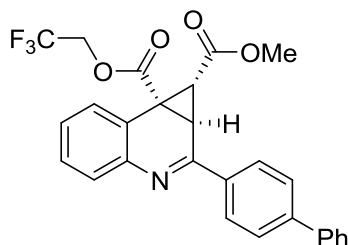

Following the general procedure, **7b** was isolated by flash chromatography on silica (EtOAc/PE = 1/10) as a colorless solid (90.1mg, 94% yield); mp 103-104 °C;  $^1H$  NMR (600 MHz,  $CDCl_3$ )  $\delta$  = 8.12 (d,  $J = 8.4$  Hz, 2H), 7.70 – 7.64 (m, 3H), 7.62 – 7.55 (m, 3H), 7.40 (t,  $J = 7.7$  Hz, 2H), 7.36 (td,  $J = 7.7, 1.4$  Hz, 1H), 7.32 (t,  $J = 7.4$  Hz, 1H), 7.25 (td,  $J = 7.6, 1.3$  Hz, 1H), 4.57 – 4.47 (m, 2H), 3.75 (s, 3H), 3.72 (d,  $J = 5.3$  Hz, 1H), 1.55 (d,  $J = 5.3$  Hz, 1H);  $^{13}C$  NMR (151 MHz,  $CDCl_3$ )  $\delta$  = 171.52, 165.34, 158.99, 144.02, 141.10, 140.18, 136.28, 130.81, 129.20, 128.95, 128.18, 127.98, 127.87, 127.36, 127.20, 126.22, 122.75 (q,  $J = 277.2$  Hz), 120.41, 61.63 (q,  $J = 37.0$  Hz), 53.07, 38.63, 28.35, 26.21;  $^{19}F$  NMR (565 MHz,  $CDCl_3$ )  $\delta$  = -73.29 (t,  $J = 8.3$  Hz); HRMS (ESI)  $m/z$ :  $[M + H]^+$  Calcd for  $C_{27}H_{21}F_3NO_4^+$  480.1417; Found 480.1415.

**1-Methyl 7b-(2,2,2-trifluoroethyl) (1*R*,1*aR*,7*bS*)-2-(4-chlorophenyl)-1,1*a*-dihydro-7*bH*-cyclopropa[*c*]quinoline-1,7*b*-dicarboxylate (7c):**

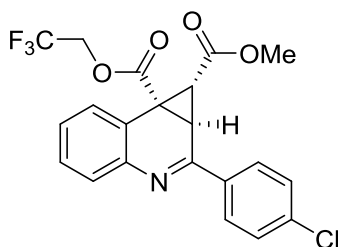

Following the general procedure, **7c** was isolated by flash chromatography on silica (EtOAc/PE = 1/10) as a colorless solid (70.0 mg, 80% yield); mp 74-75 °C;  $^1H$  NMR

(500 MHz, CDCl<sub>3</sub>)  $\delta$  = 7.98 (d,  $J$  = 8.5 Hz, 2H), 7.64 (d,  $J$  = 7.7 Hz, 1H), 7.58 (d,  $J$  = 7.8 Hz, 1H), 7.41 (d,  $J$  = 8.5 Hz, 2H), 7.37 (t,  $J$  = 7.6 Hz, 1H), 7.26 (t,  $J$  = 7.5 Hz, 1H), 4.55 – 4.48 (m, 2H), 3.75 (s, 3H), 3.62 (d,  $J$  = 5.3 Hz, 1H), 1.52 (d,  $J$  = 2.3 Hz, 1H); <sup>13</sup>C NMR (151 MHz, CDCl<sub>3</sub>)  $\delta$  = 171.33, 165.22, 158.15, 140.83, 137.57, 135.83, 130.83, 129.25, 128.95, 128.65, 128.43, 126.25, 122.70 (q,  $J$  = 277.8 Hz), 120.35, 61.64 (q,  $J$  = 37.1 Hz), 53.11, 38.56, 28.09, 26.06; <sup>19</sup>F NMR (565 MHz, CDCl<sub>3</sub>)  $\delta$  = -73.33 (t,  $J$  = 8.3 Hz); HRMS (ESI)  $m/z$ : [M + H]<sup>+</sup> Calcd for C<sub>21</sub>H<sub>16</sub>ClF<sub>3</sub>NO<sub>4</sub><sup>+</sup> 438.0714; Found 438.0720.

**1-Methyl 7b-(2,2,2-trifluoroethyl) (1*R*,1*aR*,7*bS*)-5-chloro-2-phenyl-1,1*a*-dihydro-7*bH*-cyclopropa[*c*]quinoline-1,7*b*-dicarboxylate (7*d*):**

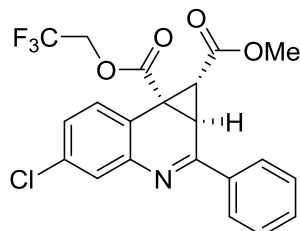

Following the general procedure, **7d** was isolated by flash chromatography on silica (EtOAc/PE = 1/5) as a colorless solid (79.7 mg, 91% yield); mp 104-105 °C; <sup>1</sup>H NMR (500 MHz, CDCl<sub>3</sub>)  $\delta$  = 8.06 – 8.01 (m, 2H), 7.71 – 7.51 (m, 2H), 7.50 – 7.42 (m, 3H), 7.22 (dd,  $J$  = 8.3, 2.2 Hz, 1H), 4.51 (q,  $J$  = 8.3 Hz, 2H), 3.75 (s, 3H), 3.68 (d,  $J$  = 5.3 Hz, 1H), 1.53 (d,  $J$  = 5.4 Hz, 1H); <sup>13</sup>C NMR (151 MHz, CDCl<sub>3</sub>)  $\delta$  = 171.04, 165.11, 160.90, 142.23, 137.02, 134.68, 131.73, 130.45, 128.78, 127.99, 127.50, 127.39, 122.66 (q,  $J$  = 277.1 Hz), 118.89, 61.67 (q,  $J$  = 37.0 Hz), 53.15, 37.98, 28.31, 26.44; <sup>19</sup>F NMR (565 MHz, CDCl<sub>3</sub>)  $\delta$  = -73.32 (t,  $J$  = 8.3 Hz); HRMS (ESI)  $m/z$ : [M + H]<sup>+</sup> Calcd for C<sub>21</sub>H<sub>16</sub>ClF<sub>3</sub>NO<sub>4</sub><sup>+</sup> 438.0714; Found 438.0715.

## VI. The Mechanism Studies

### Synthetic Procedure and Analytical Data of Compound **5a**:

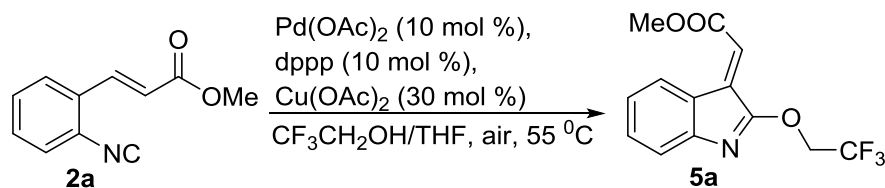

A solution of **2a** (37.4 mg, 0.2 mmol), Pd(OAc)<sub>2</sub> (4.4 mg, 0.02 mmol), dppp (8.2mg, 0.02 mmol), and Cu(OAc)<sub>2</sub> (10.8 mg, 0.06 mmol) in anhydrous THF and CF<sub>3</sub>CH<sub>2</sub>OH (2.0 mL, V/V = 1/6) was heated at 55 °C in a sealed tube under stirring for 12 h, then substrate **2a** was consumed as indicated by TLC. The resulting mixture was concentrated in vacuo, and purification of the crude product with flash column chromatography (ethyl acetate/petroleum ether = 1:20) gave **5a** (21.7 mg, 38 % yield) as an orange solid.

### Methyl (*E*)-2-(2-(2,2,2-trifluoroethoxy)-3*H*-indol-3-ylidene)acetate **5a**:

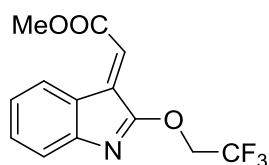

Following the general procedure, **5a** was isolated by flash chromatography on silica (EtOAc/PE = 1/20) as an orange solid (21.7 mg, 38% yield); mp 100-101 °C; <sup>1</sup>H NMR (600 MHz, CDCl<sub>3</sub>) δ = 8.41 (d, *J* = 7.6 Hz, 1H), 7.34 (td, *J* = 7.6, 1.2 Hz, 1H), 7.21 (d, *J* = 7.6 Hz, 1H), 7.12 (td, *J* = 7.6, 1.0 Hz, 1H), 6.70 (s, 1H), 4.82 (q, *J* = 8.2 Hz, 2H), 3.90 (s, 3H). <sup>13</sup>C NMR (151 MHz, CDCl<sub>3</sub>) δ = 169.95, 165.51, 153.85, 139.79, 132.50, 128.07, 125.59, 125.29, 122.77 (q, *J* = 277.2 Hz), 121.36, 119.10, 64.99 (q, *J* = 36.9 Hz), 52.32; <sup>19</sup>F NMR (565 MHz, CDCl<sub>3</sub>) δ = -73.85 (t, *J* = 8.3 Hz); HRMS (ESI) *m/z*: [M + H]<sup>+</sup> Calcd for C<sub>13</sub>H<sub>11</sub>F<sub>3</sub>NO<sub>3</sub><sup>+</sup> 286.0686; Found 286.0683.

## V. The X-ray Analytical data of Compound **4ai** and **7a**:

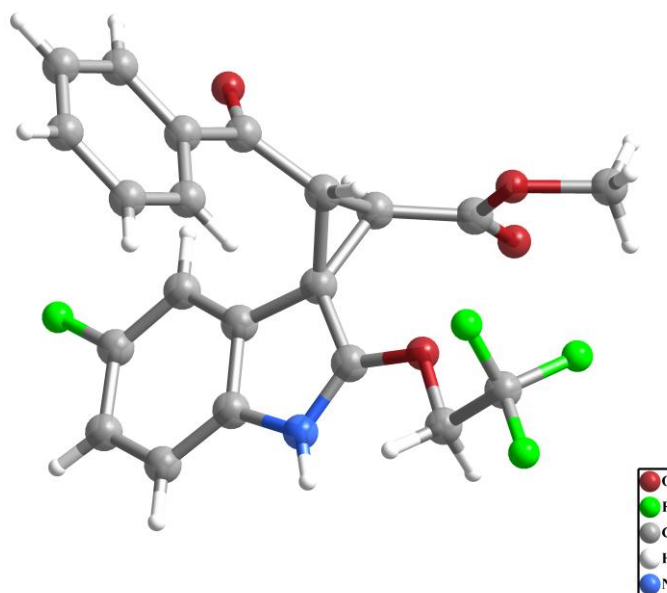

Figure 1. The ORTEP drawing of crystal (The ellipsoid contour percent probability level is 50%).  
Method of Crystallization: The **4ai** was recrystallized from mixed solvents of ethyl acetate and petroleum ether at 25 °C.

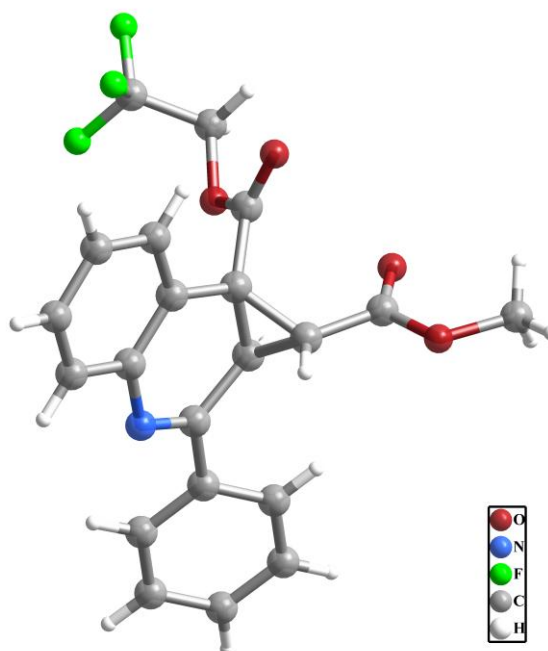

Figure 2. The ORTEP drawing of crystal (The ellipsoid contour percent probability level is 50%).  
Method of Crystallization: The **7a** was recrystallized from mixed solvents of ethyl acetate and petroleum ether at 25 °C.

## VII. References:

1. (a) H. Tokuyama, Y. Kaburagi, X. Chen and T. Fukuyama, *Synthesis*, **2000**, 429; (b) T. Mamoru, F. Hirokazu, K. Keika and C. Naoto, *J. Org. Chem.*, **2010**, 75, 4841.
2. (a) J. Quintana, M. Torres and F. Serratosa, *Tetrahedron.*, **1973**, 29, 2065; (b) G. Payne, *J. Org. Chem.*, **1967**, 32, 3351.

VIII. Copies of  $^1\text{H}$  NMR,  $^{13}\text{C}$  NMR and  $^{19}\text{F}$  NMR Spectra of 4-7:

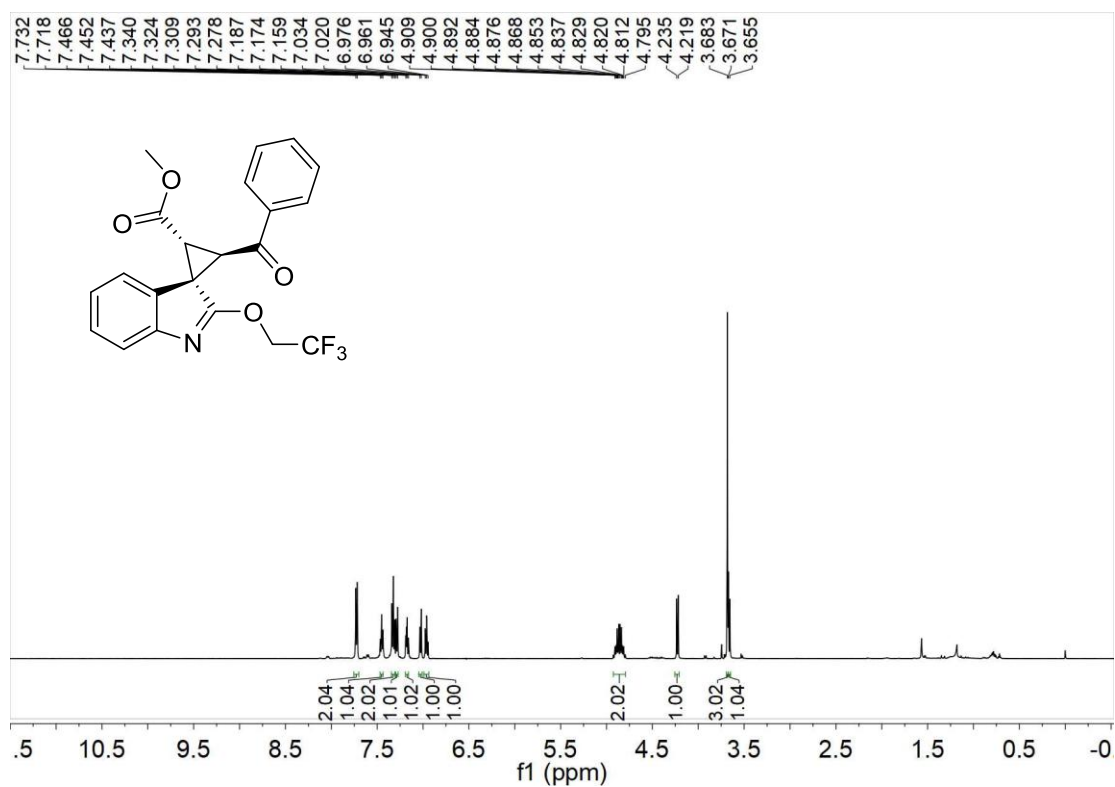

Figure 3.  $^1\text{H}$  NMR spectrum (500 MHz,  $\text{CDCl}_3$ ) of 4aa

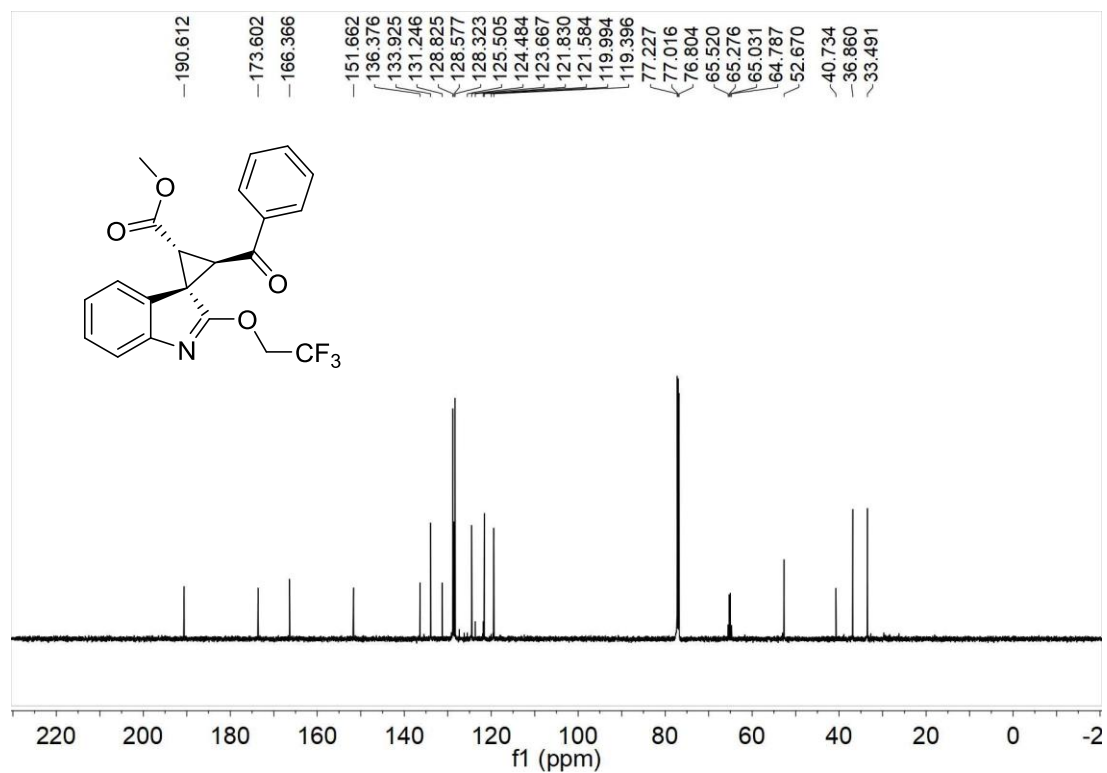

Figure 4.  $^{13}\text{C}$  NMR spectrum (151 MHz,  $\text{CDCl}_3$ ) of 4aa

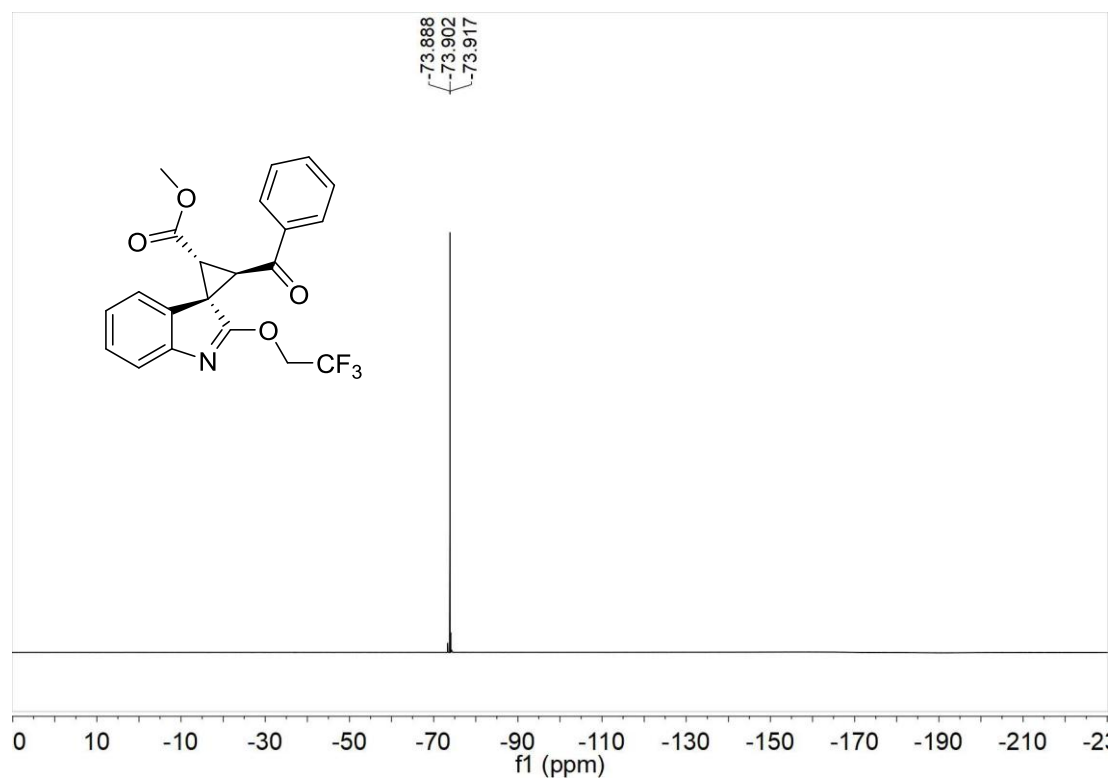

**Figure 5.**  $^{19}\text{F}$  NMR spectrum (565 MHz,  $\text{CDCl}_3$ ) of **4aa**

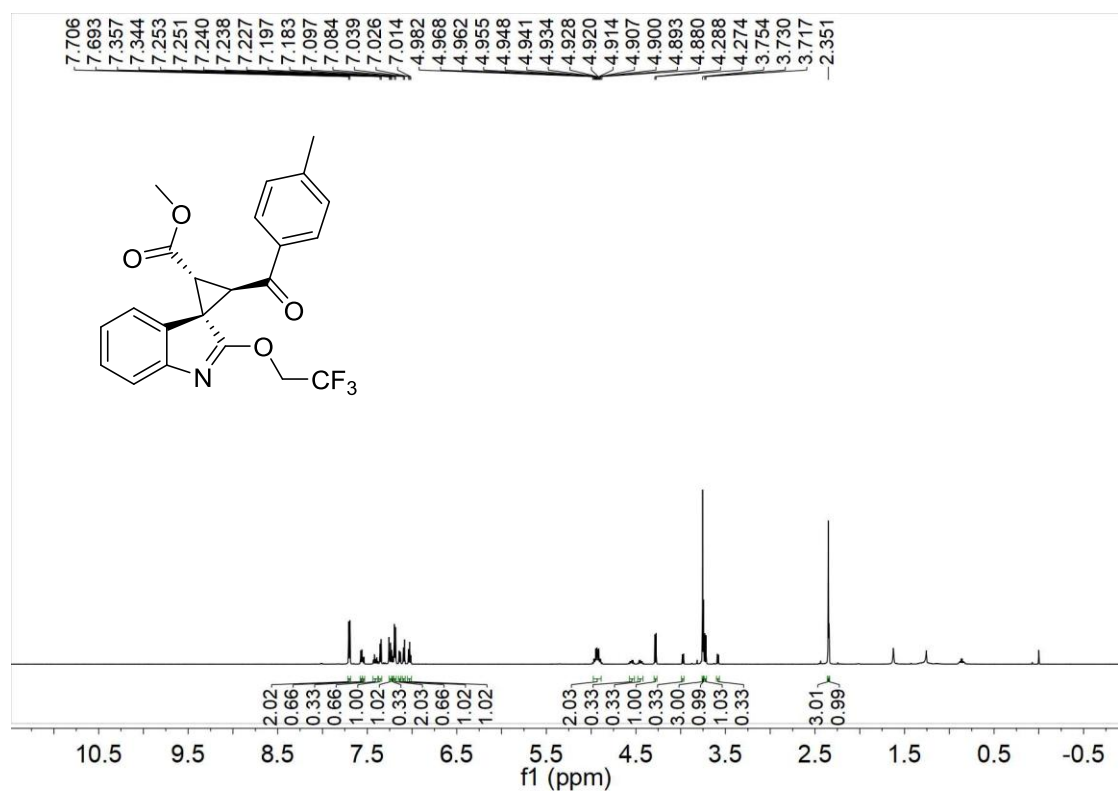

**Figure 6.**  $^1\text{H}$  NMR spectrum (600 MHz,  $\text{CDCl}_3$ ) of **4ba**



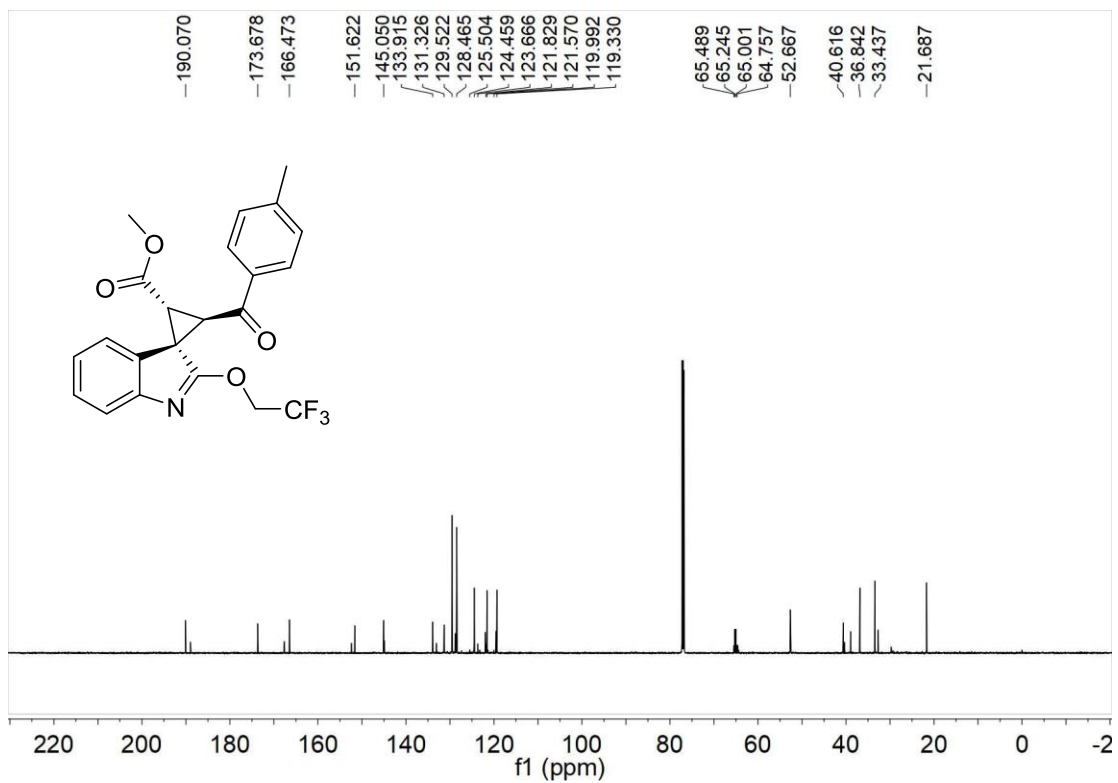

Figure 7. <sup>13</sup>C NMR spectrum (151 MHz, CDCl<sub>3</sub>) of 4ba

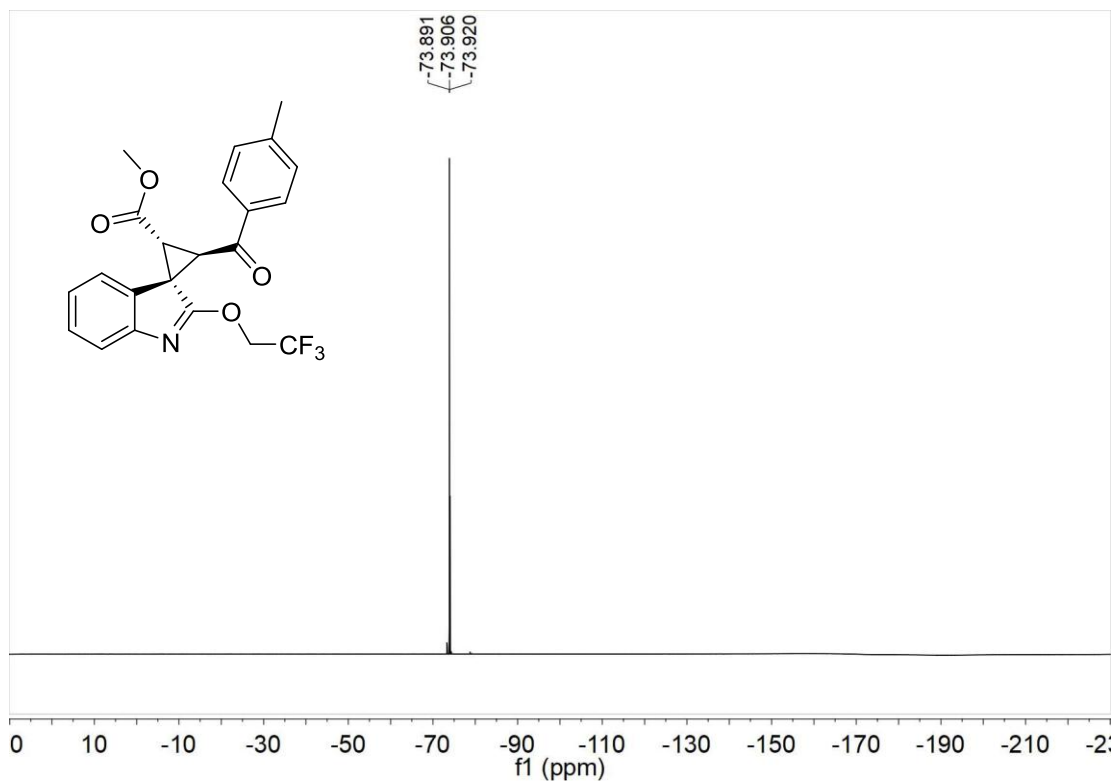

Figure 8. <sup>19</sup>F NMR spectrum (565 MHz, CDCl<sub>3</sub>) of 4ba

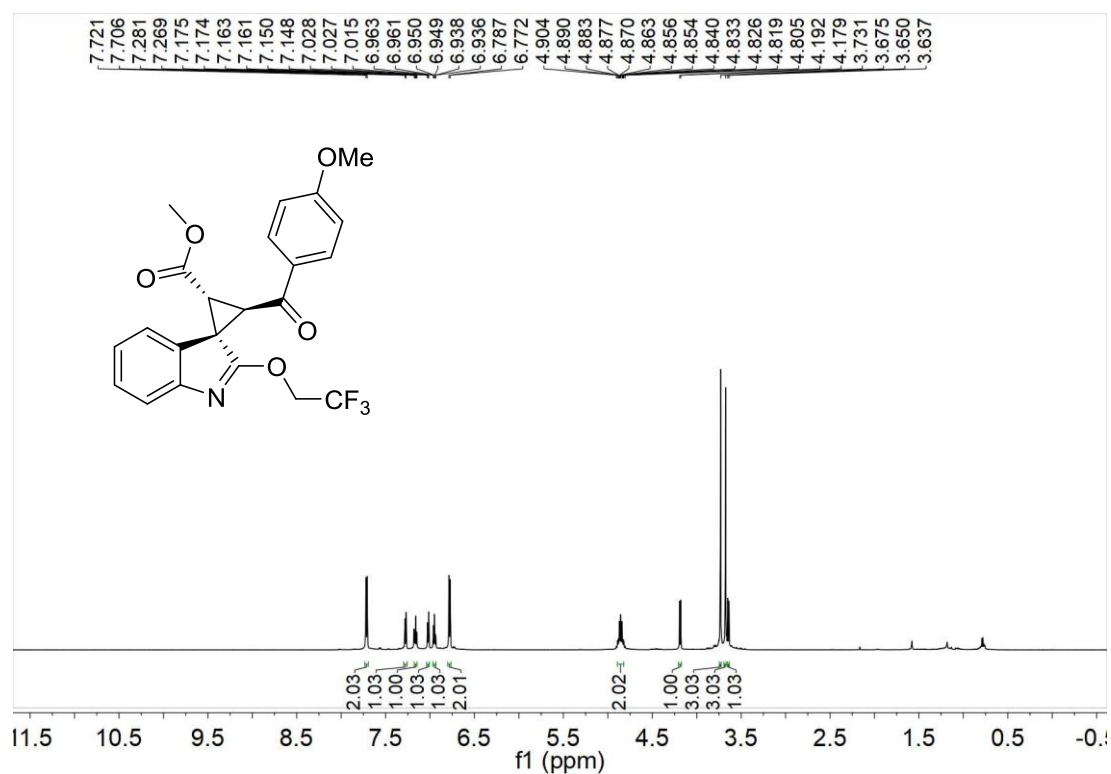

**Figure 9.** <sup>1</sup>H NMR spectrum (600 MHz, CDCl<sub>3</sub>) of **4ca**

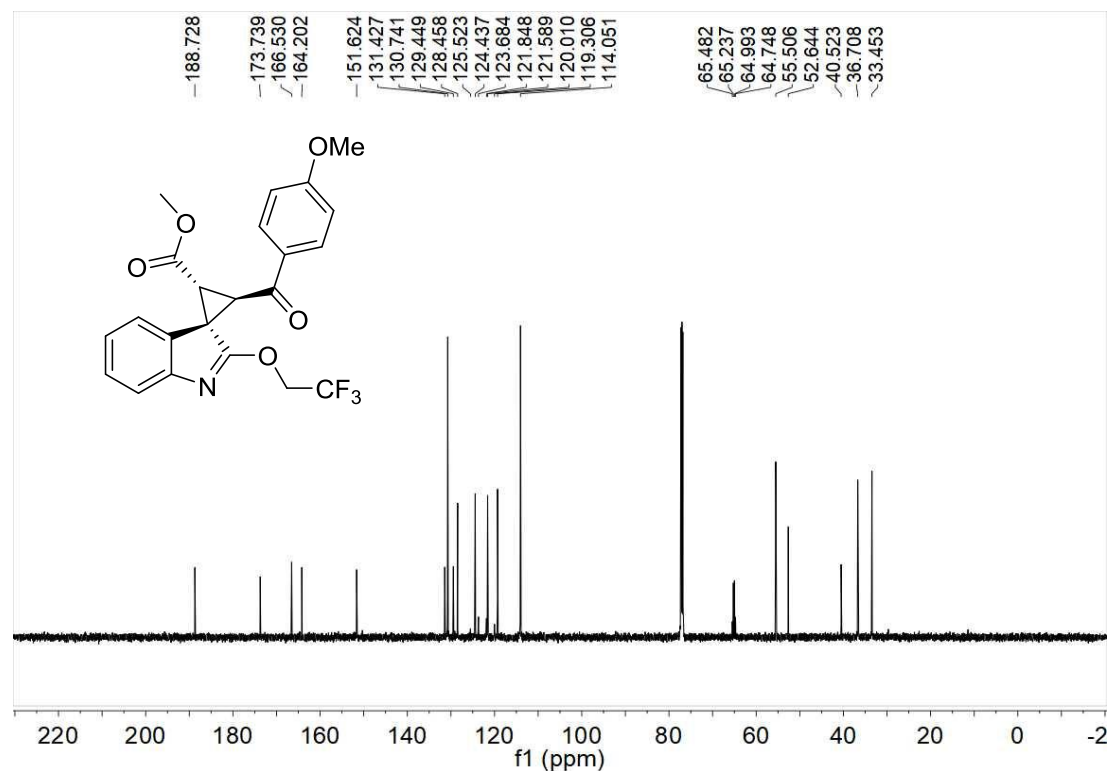

**Figure 10.** <sup>13</sup>C NMR spectrum (151 MHz, CDCl<sub>3</sub>) of **4ca**

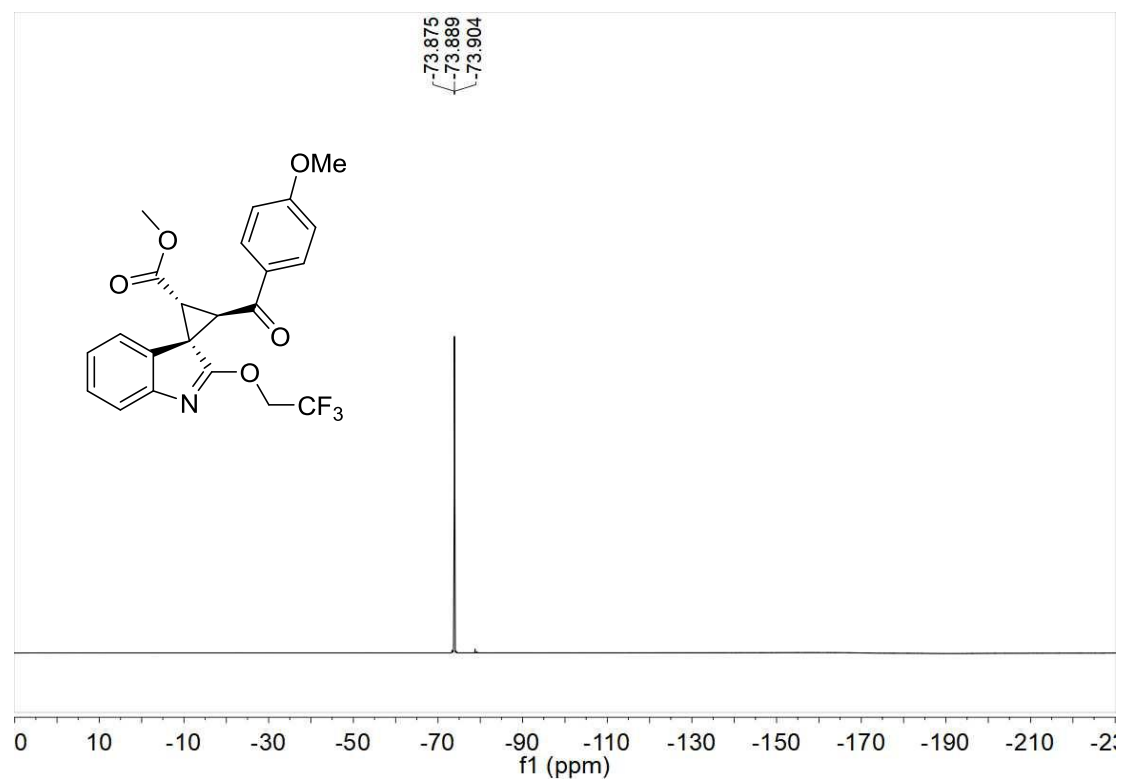

**Figure 11.**  $^{19}\text{F}$  NMR spectrum (565 MHz,  $\text{CDCl}_3$ ) of **4ca**

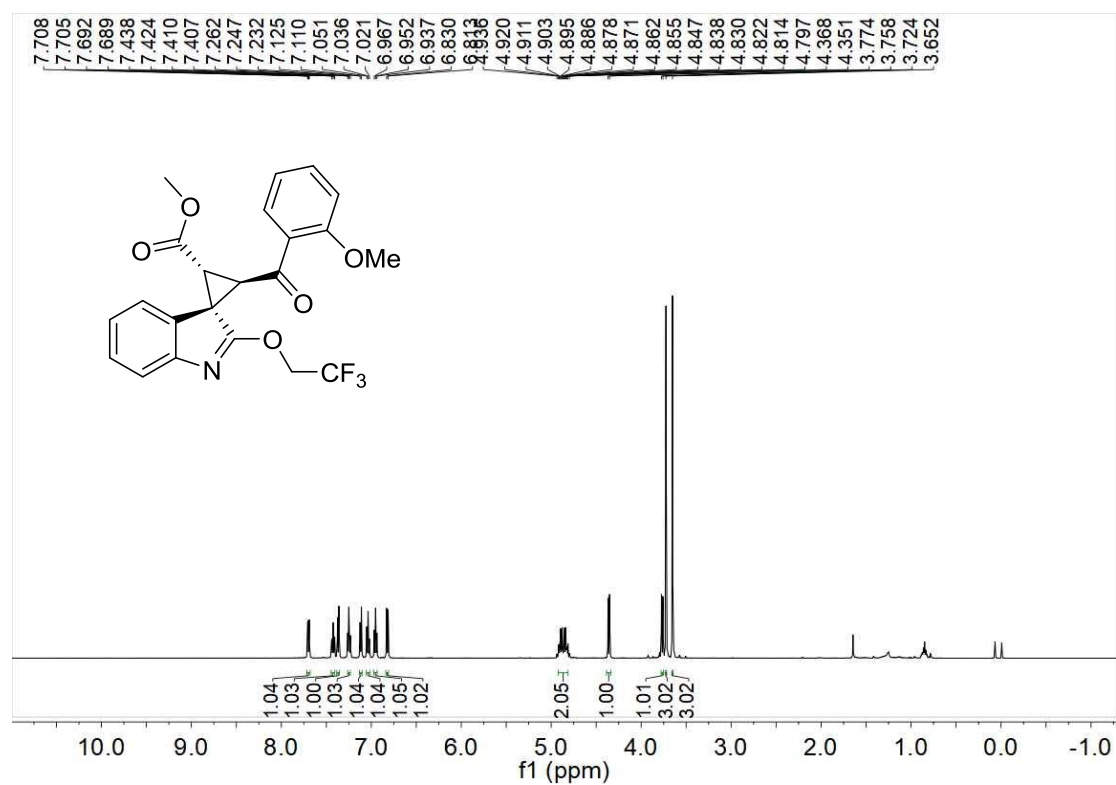

**Figure 12.**  $^1\text{H}$  NMR spectrum (500 MHz,  $\text{CDCl}_3$ ) of **4da**

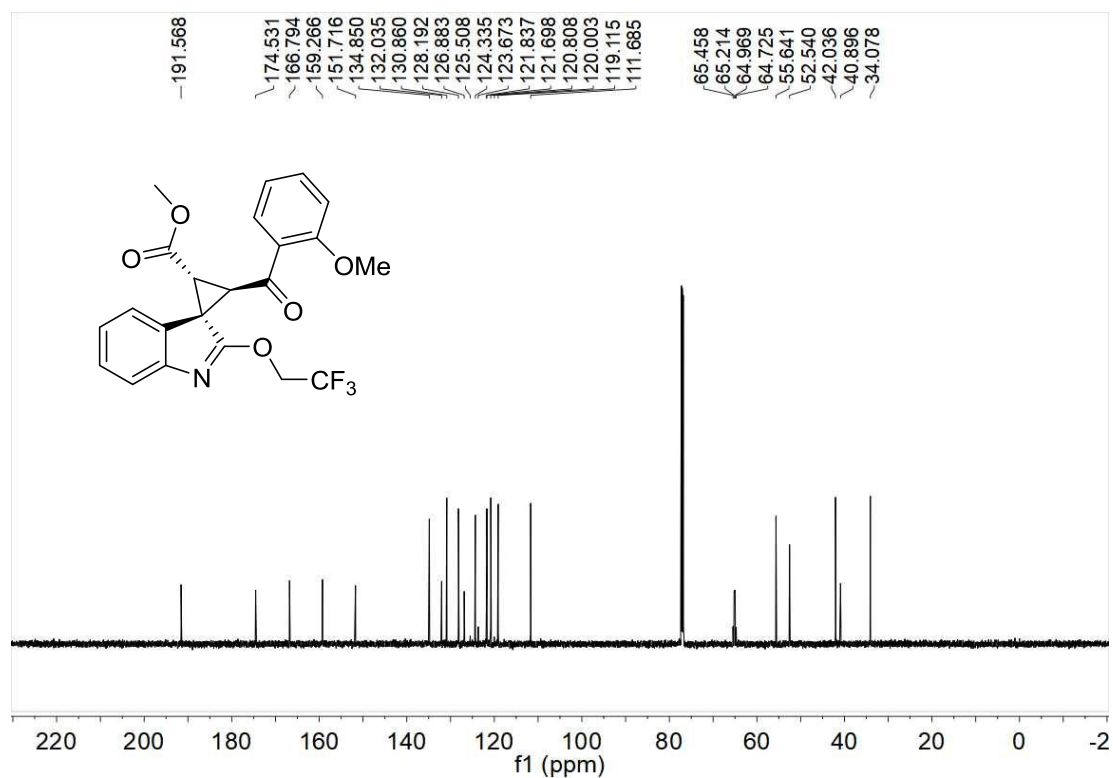

**Figure 13.** <sup>13</sup>C NMR spectrum (151 MHz, CDCl<sub>3</sub>) of **4da**

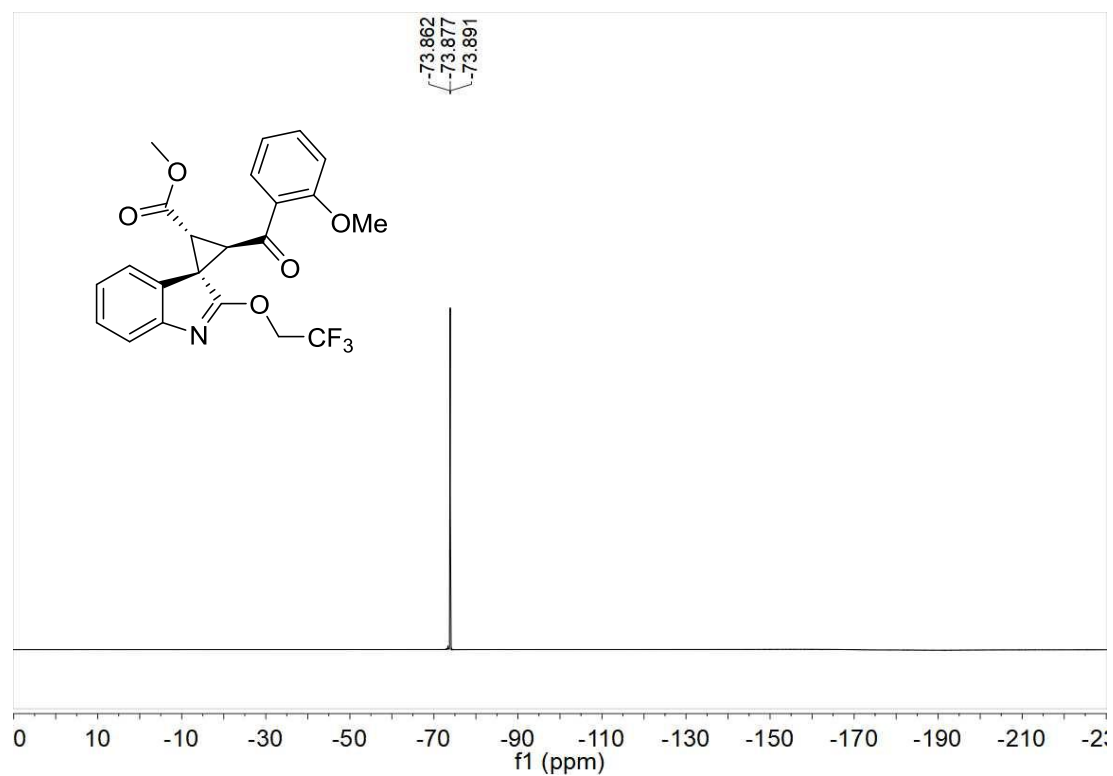

**Figure 14.** <sup>19</sup>F NMR spectrum (565 MHz, CDCl<sub>3</sub>) of **4da**

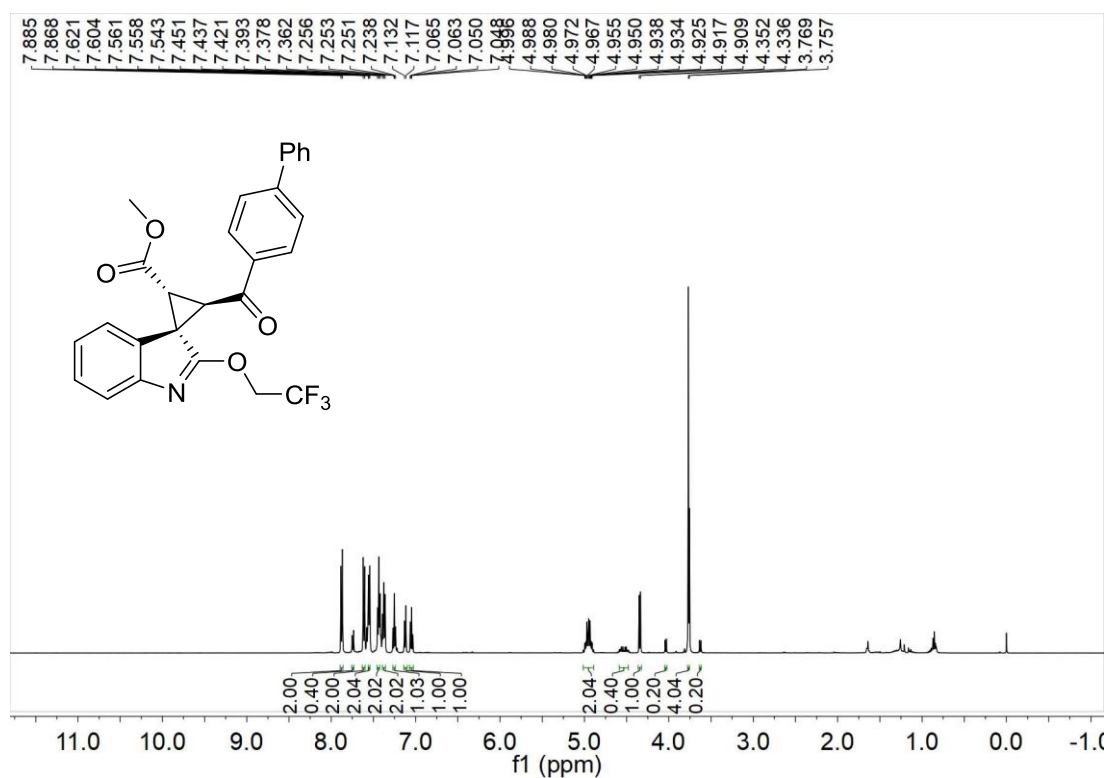

Figure 15.  $^1\text{H}$  NMR spectrum (500 MHz,  $\text{CDCl}_3$ ) of 4ea

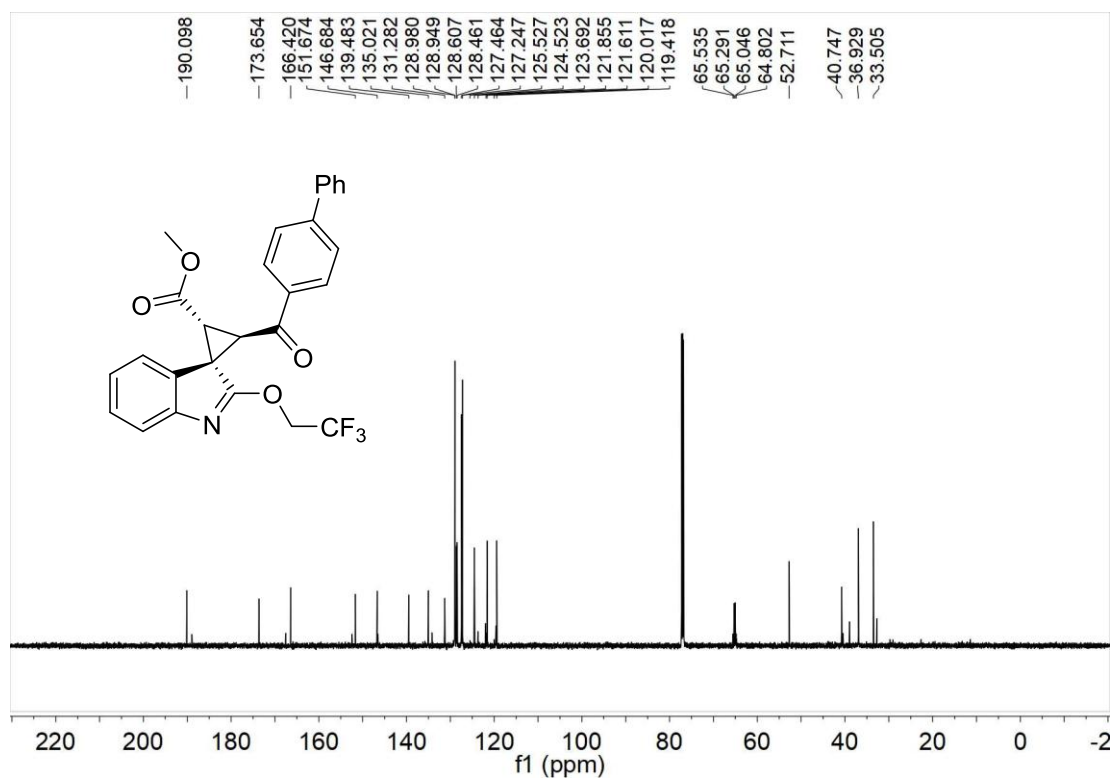

Figure 16.  $^{13}\text{C}$  NMR spectrum (151 MHz,  $\text{CDCl}_3$ ) of 4ea

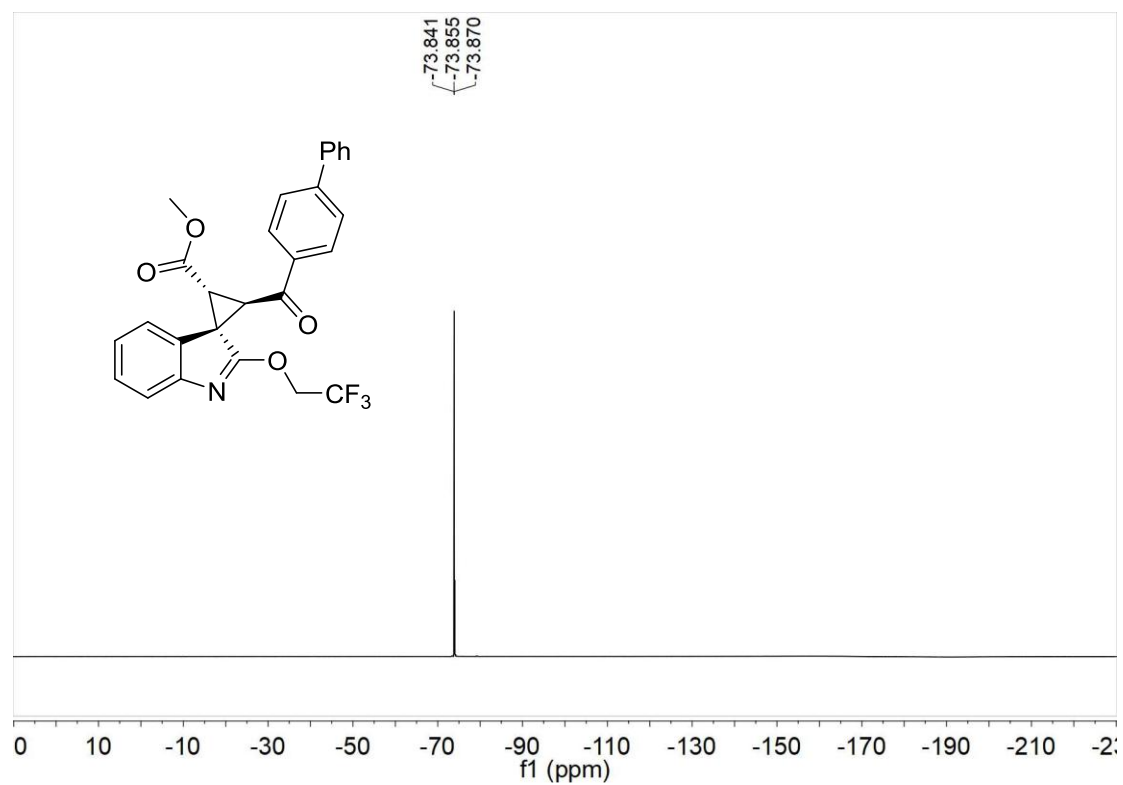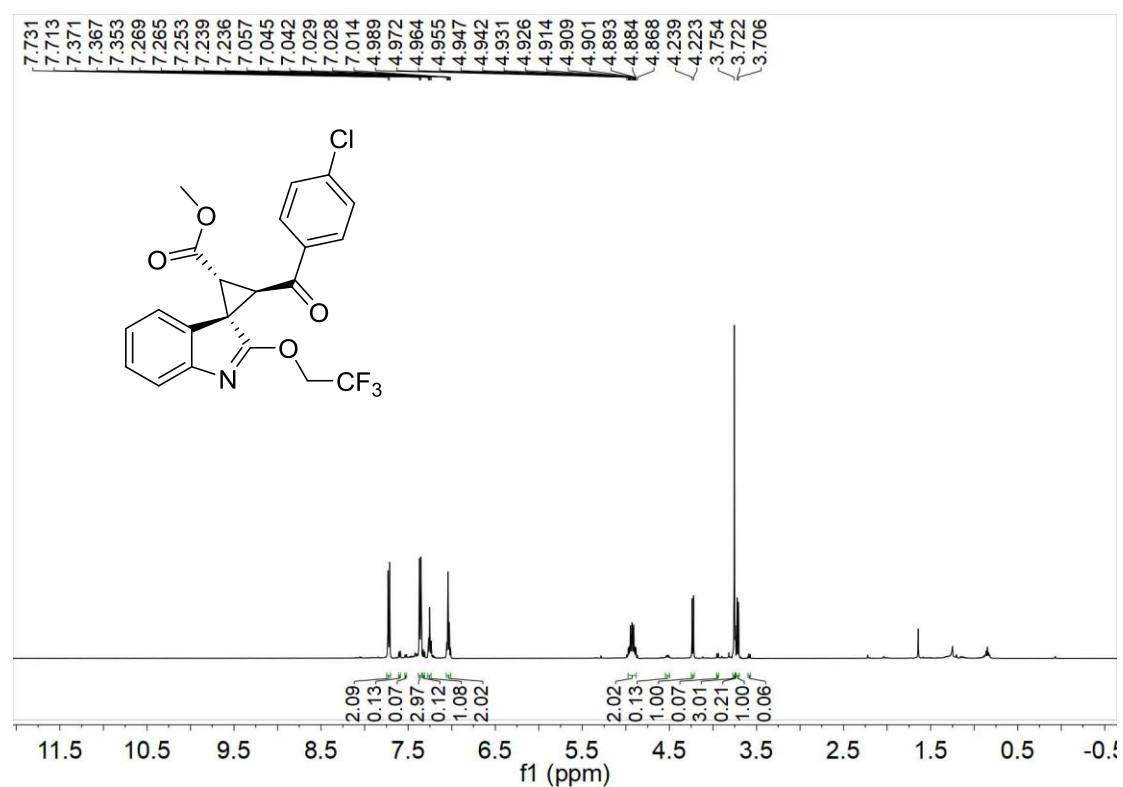

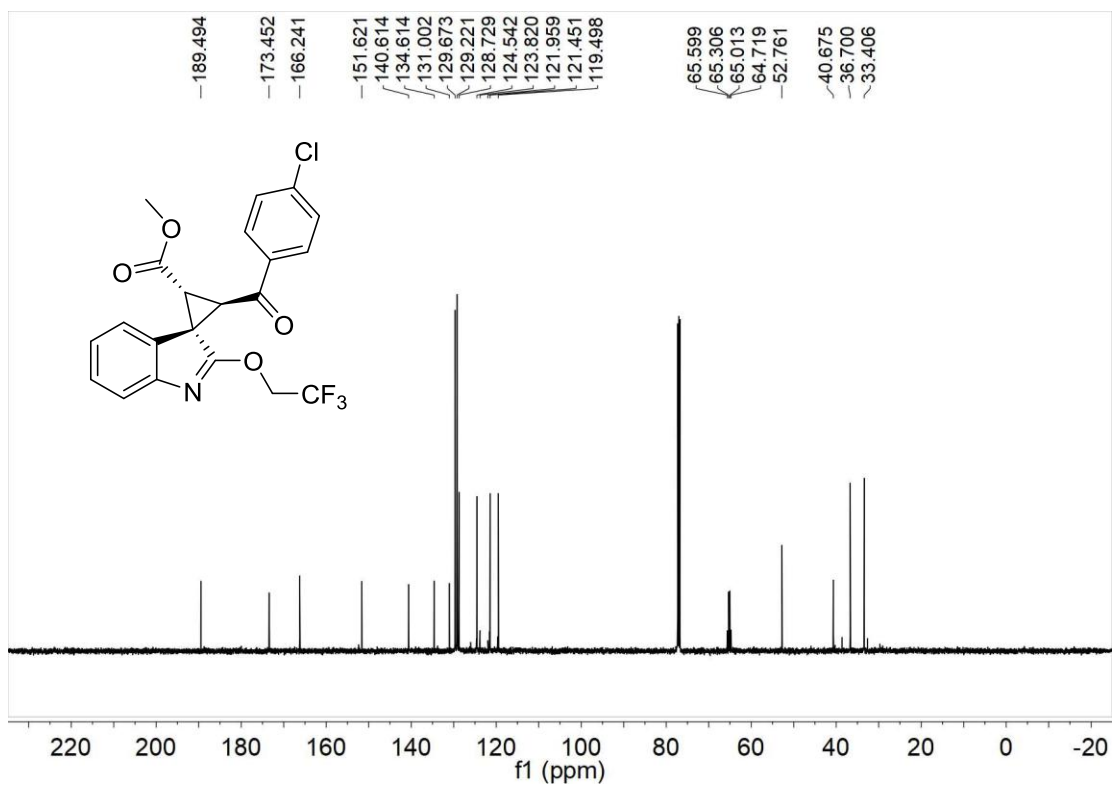

**Figure 19.**  $^{13}\text{C}$  NMR spectrum (151 MHz,  $\text{CDCl}_3$ ) of **4fa**

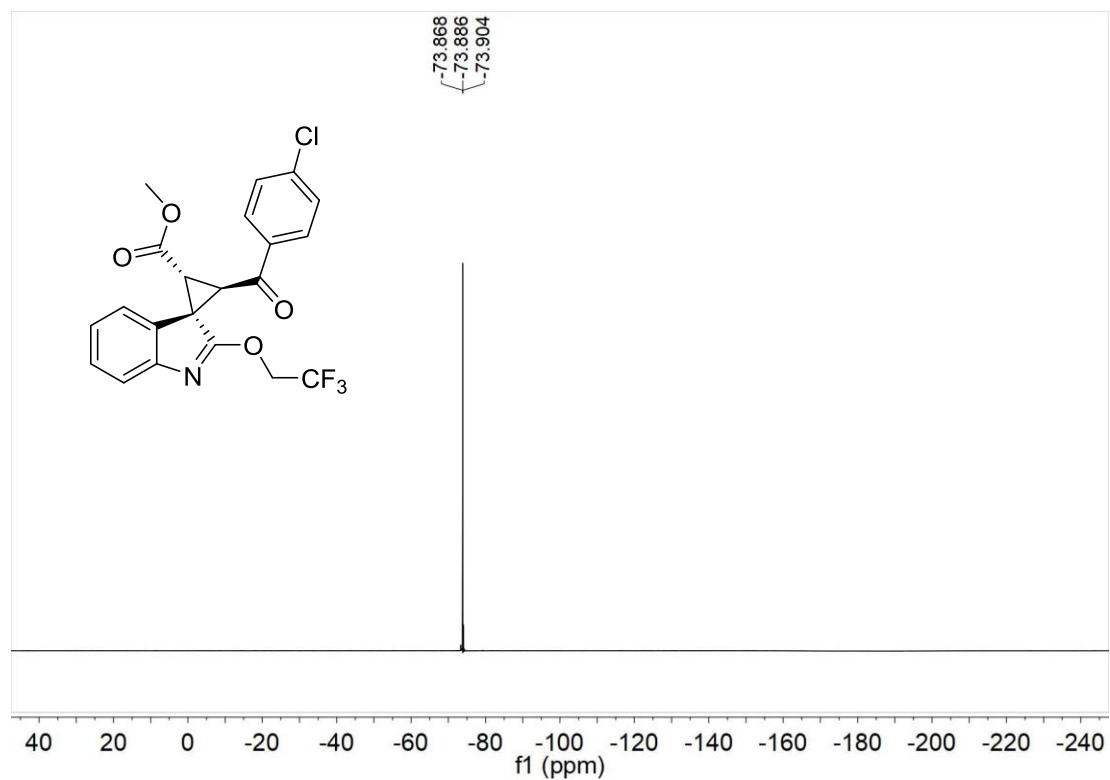

**Figure 20.**  $^{19}\text{F}$  NMR spectrum (565 MHz,  $\text{CDCl}_3$ ) of **4fa**

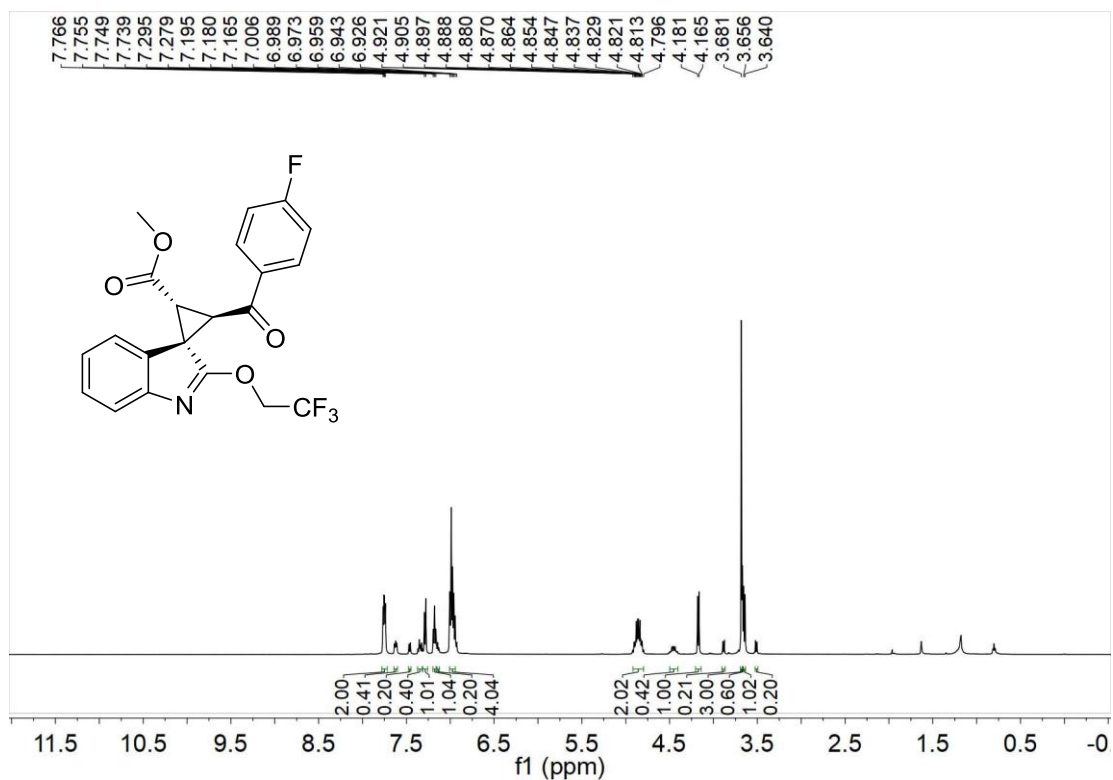

**Figure 21.**  $^1\text{H}$  NMR spectrum (500 MHz,  $\text{CDCl}_3$ ) of **4ga**

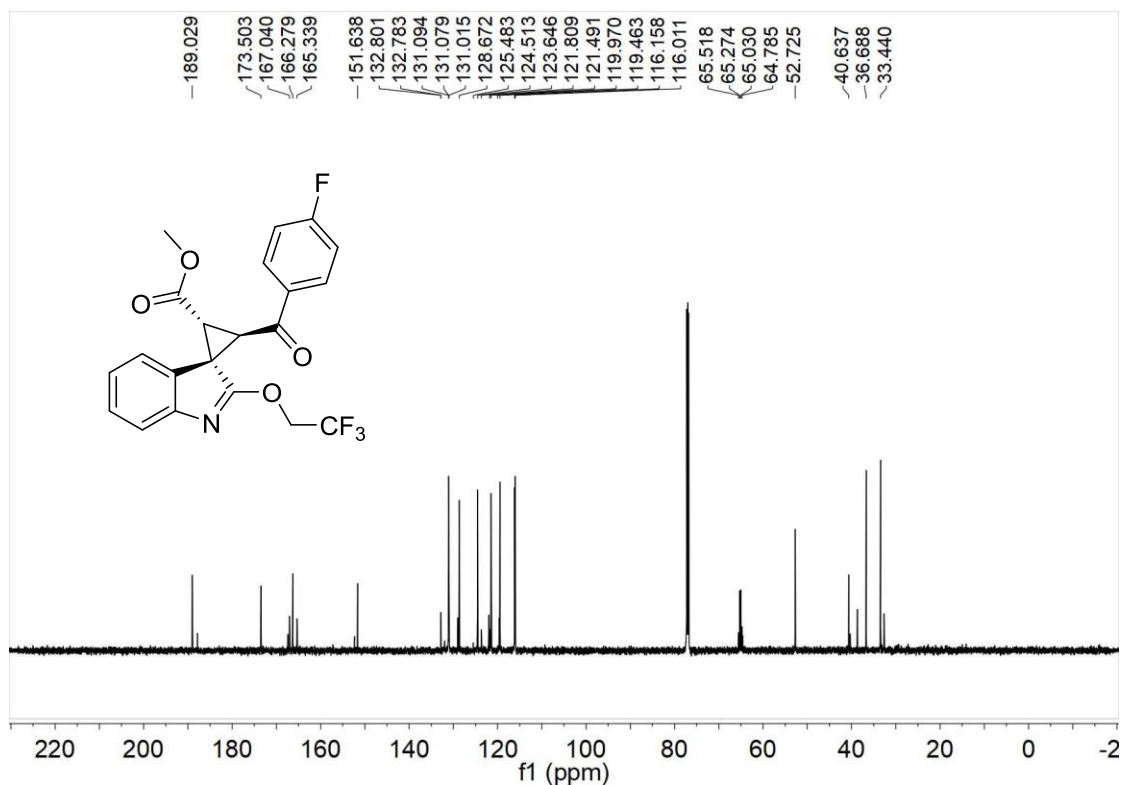

**Figure 22.**  $^{13}\text{C}$  NMR spectrum (151 MHz,  $\text{CDCl}_3$ ) of **4ga**



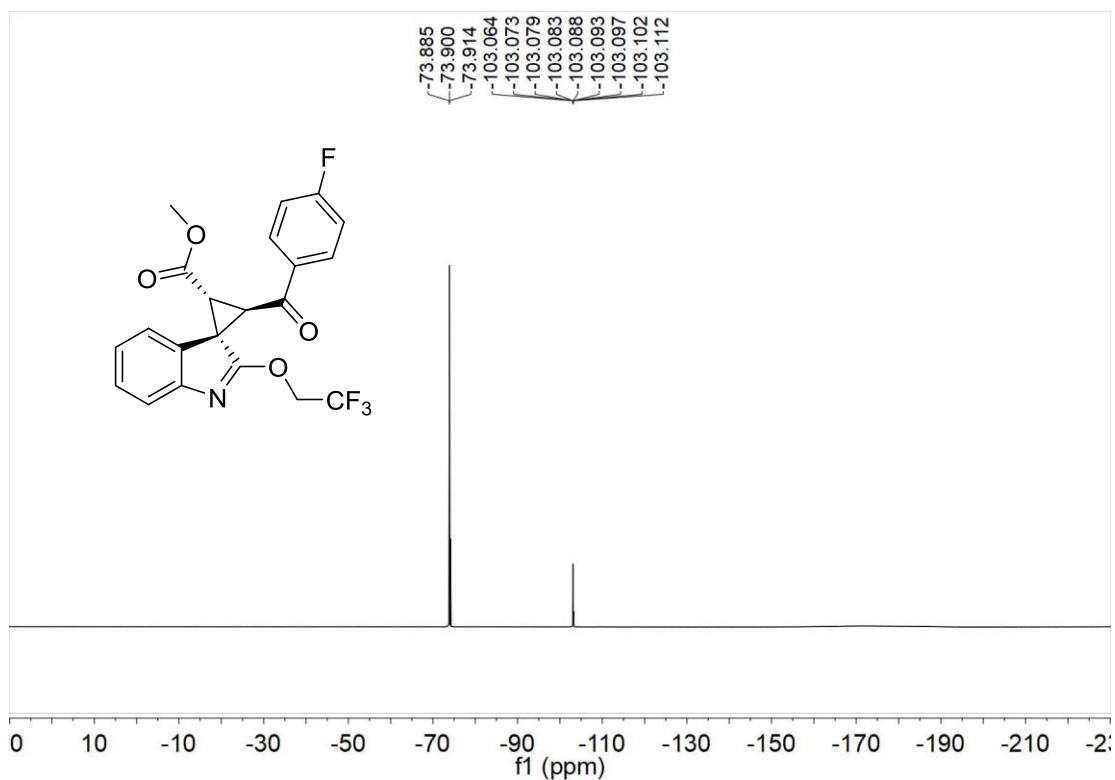

**Figure 23.**  $^{19}\text{F}$  NMR spectrum (565 MHz,  $\text{CDCl}_3$ ) of **4ga**

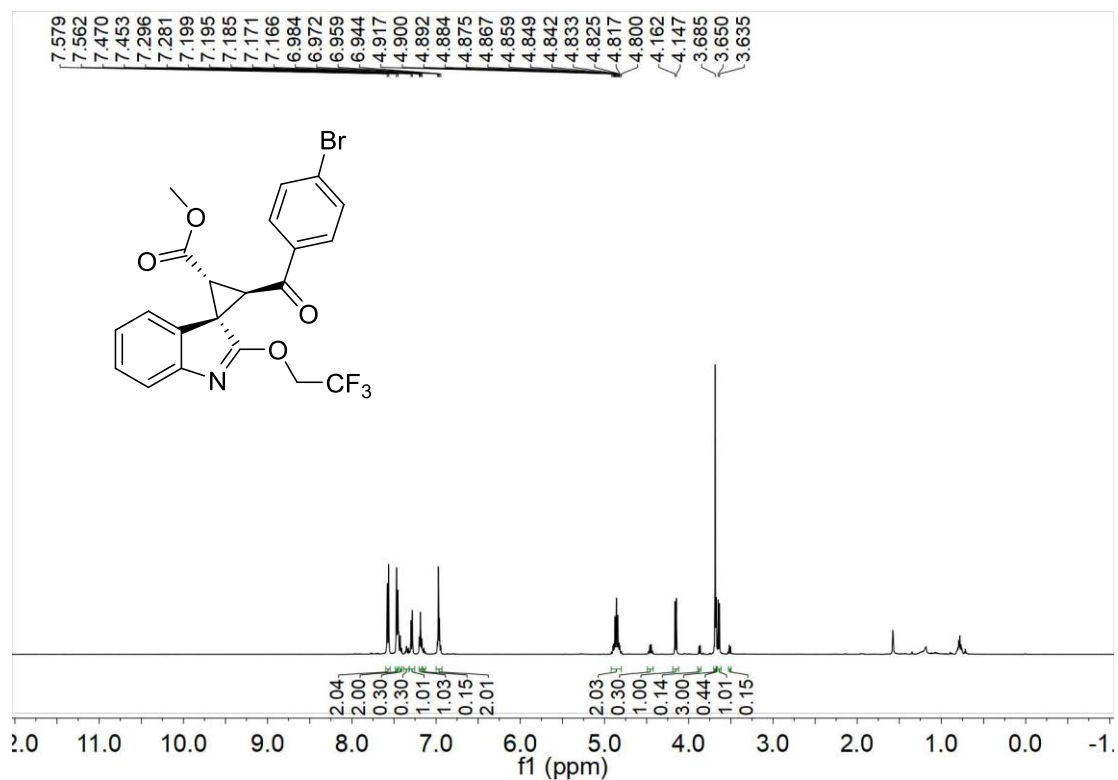

**Figure 24.**  $^1\text{H}$  NMR spectrum (500 MHz,  $\text{CDCl}_3$ ) of **4ha**

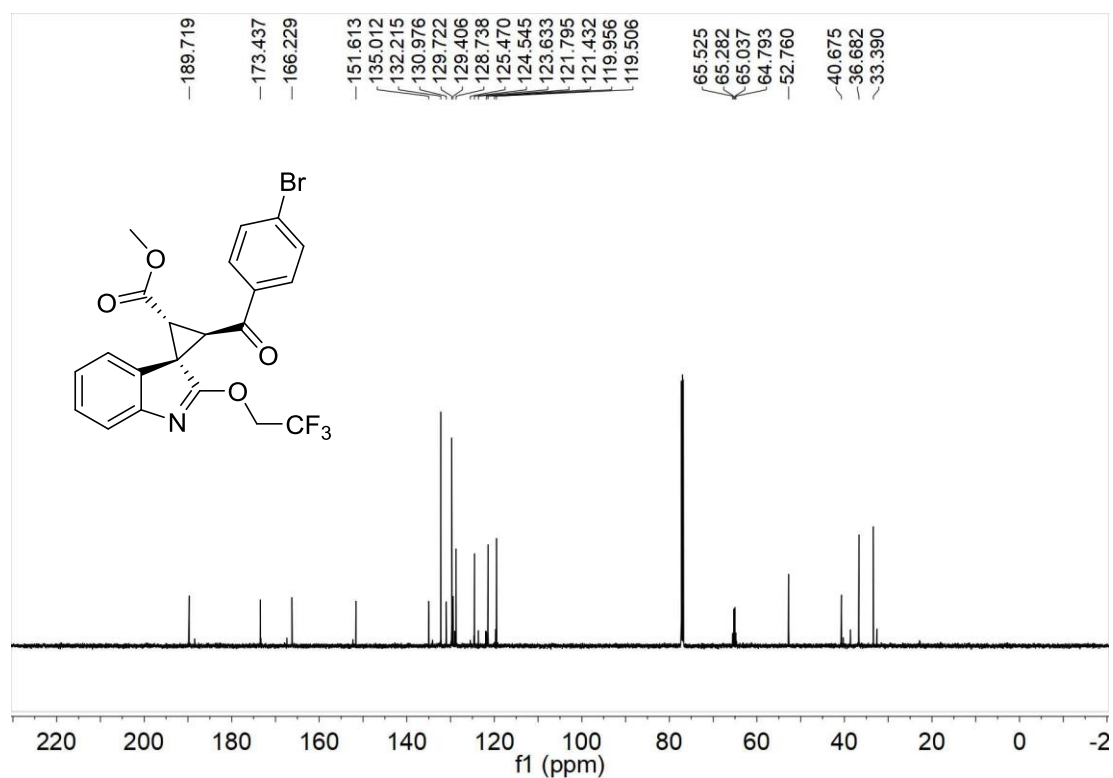

**Figure 25.** <sup>13</sup>C NMR spectrum (151 MHz, CDCl<sub>3</sub>) of **4ha**

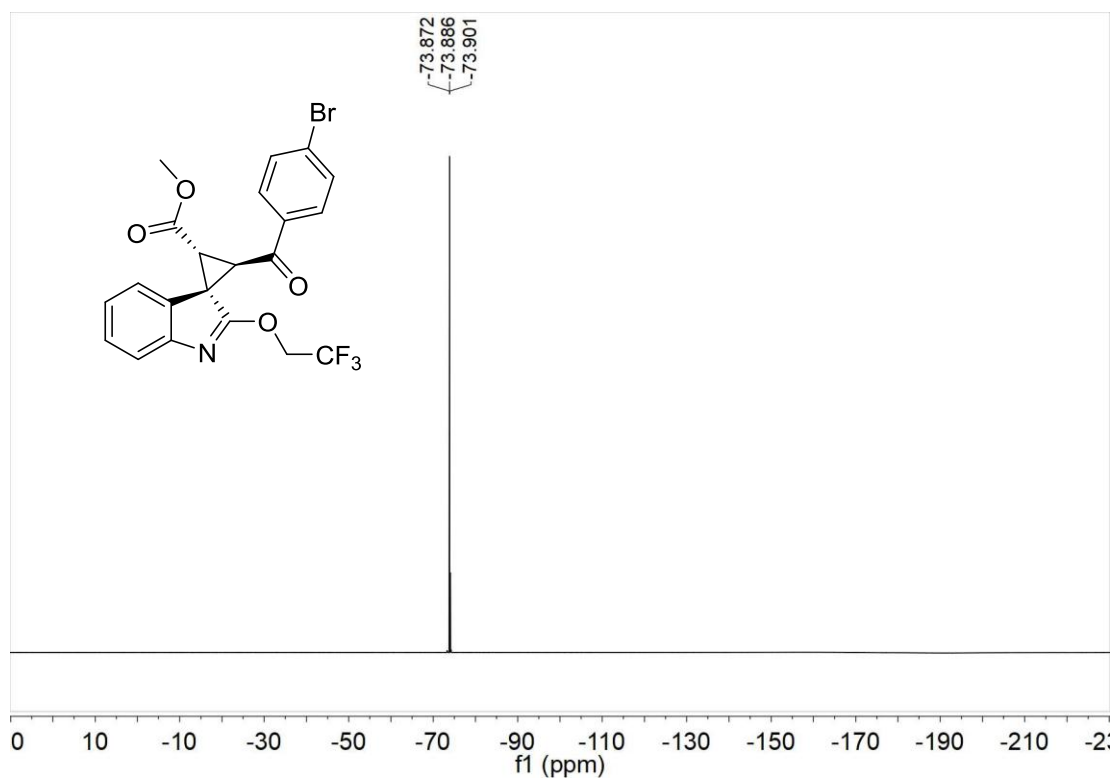

**Figure 26.** <sup>19</sup>F NMR spectrum (565 MHz, CDCl<sub>3</sub>) of **4ha**

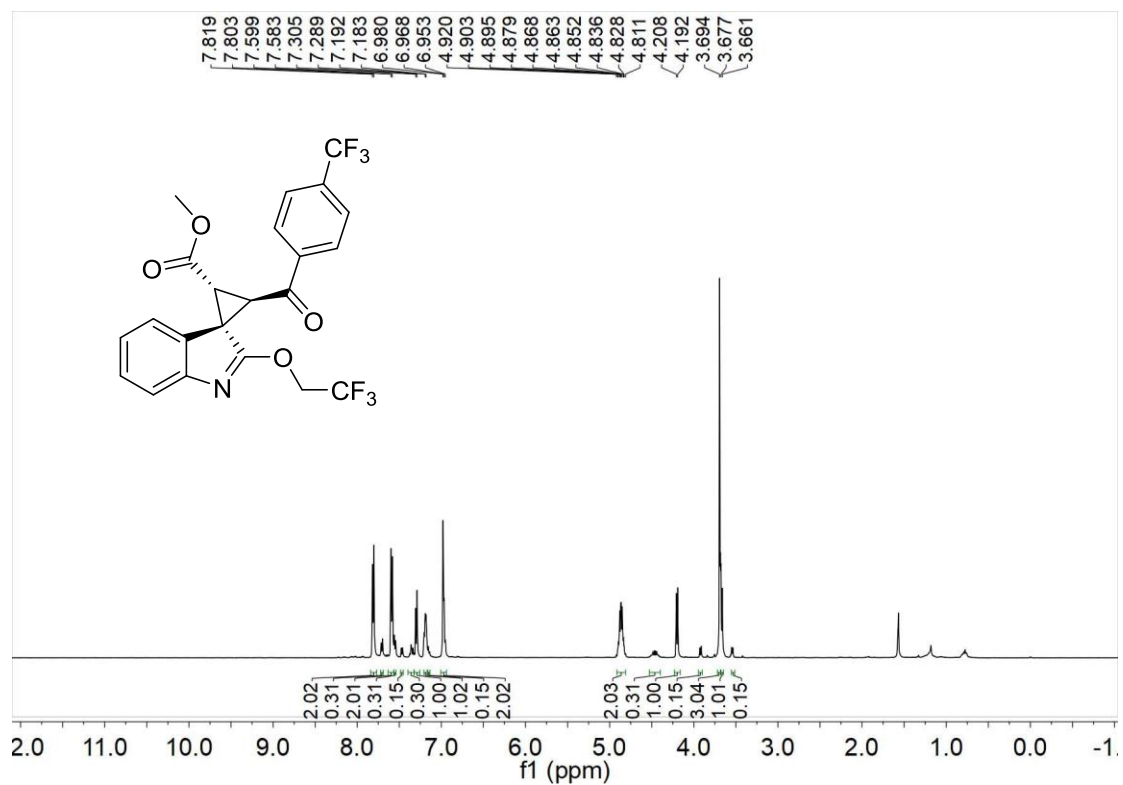

**Figure 27.**  $^1\text{H}$  NMR spectrum (500 MHz,  $\text{CDCl}_3$ ) of **4ia**

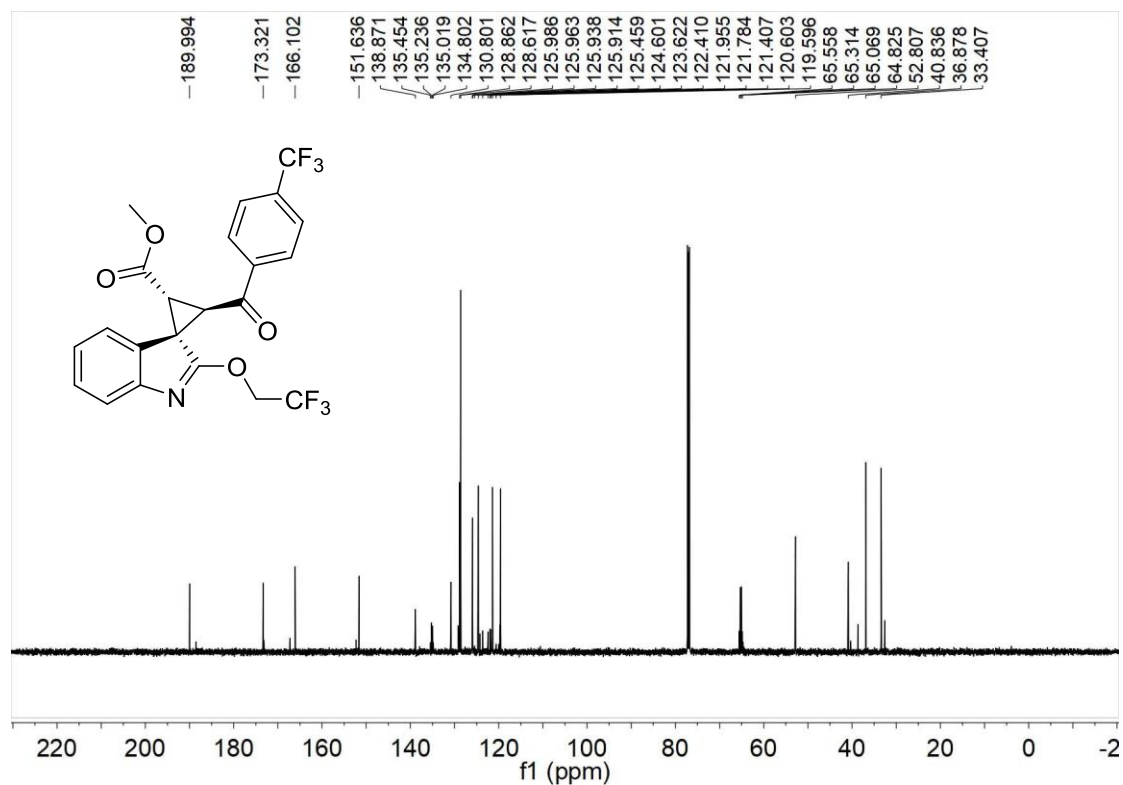

**Figure 28.**  $^{13}\text{C}$  NMR spectrum (151 MHz,  $\text{CDCl}_3$ ) of **4ia**

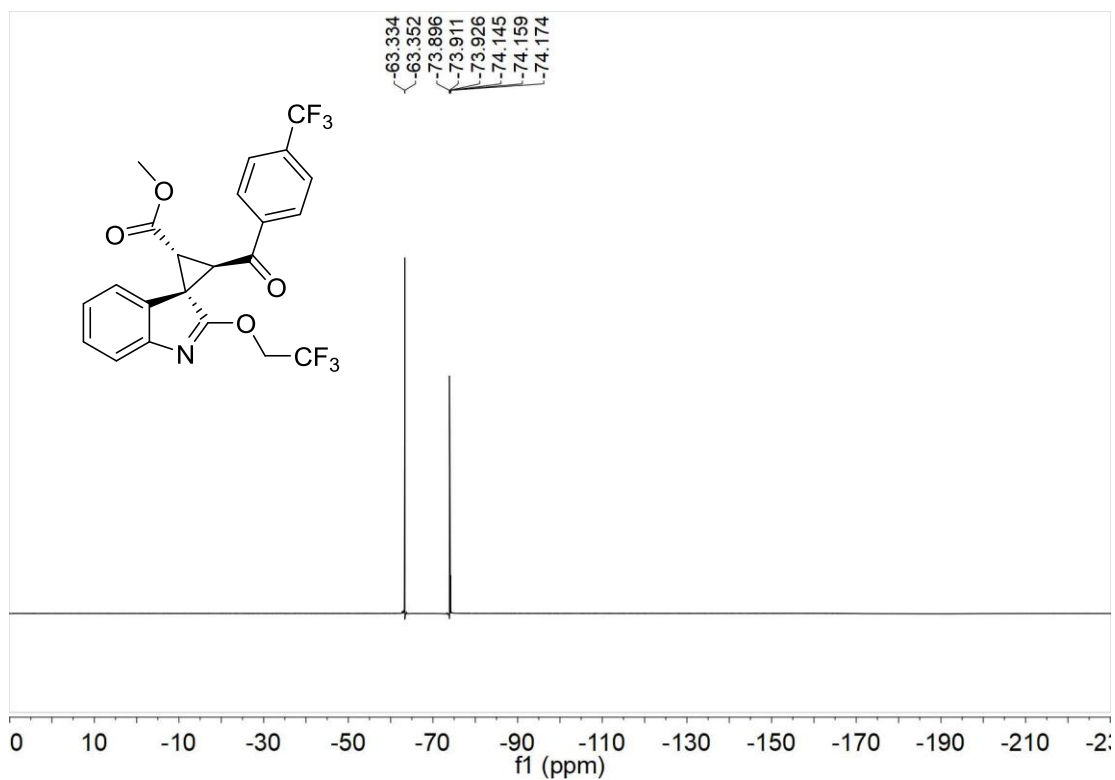

**Figure 29.**  $^{19}\text{F}$  NMR spectrum (565 MHz,  $\text{CDCl}_3$ ) of **4ia**

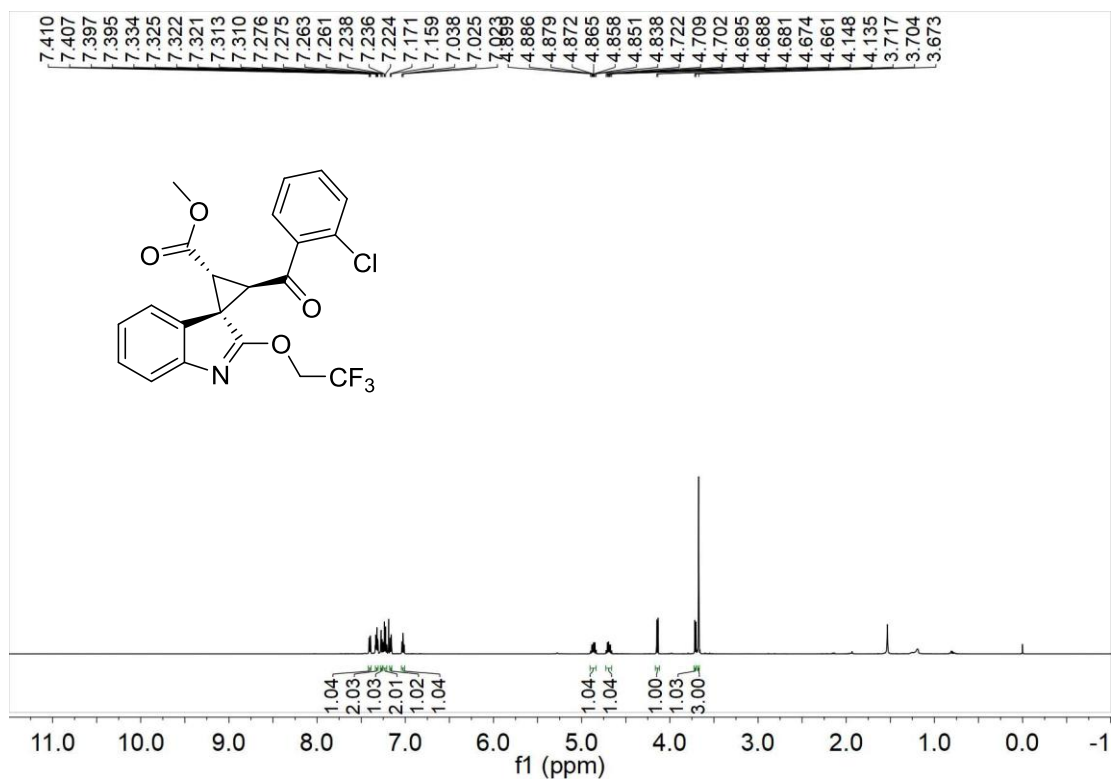

**Figure 30.**  $^1\text{H}$  NMR spectrum (600 MHz,  $\text{CDCl}_3$ ) of **4ja**

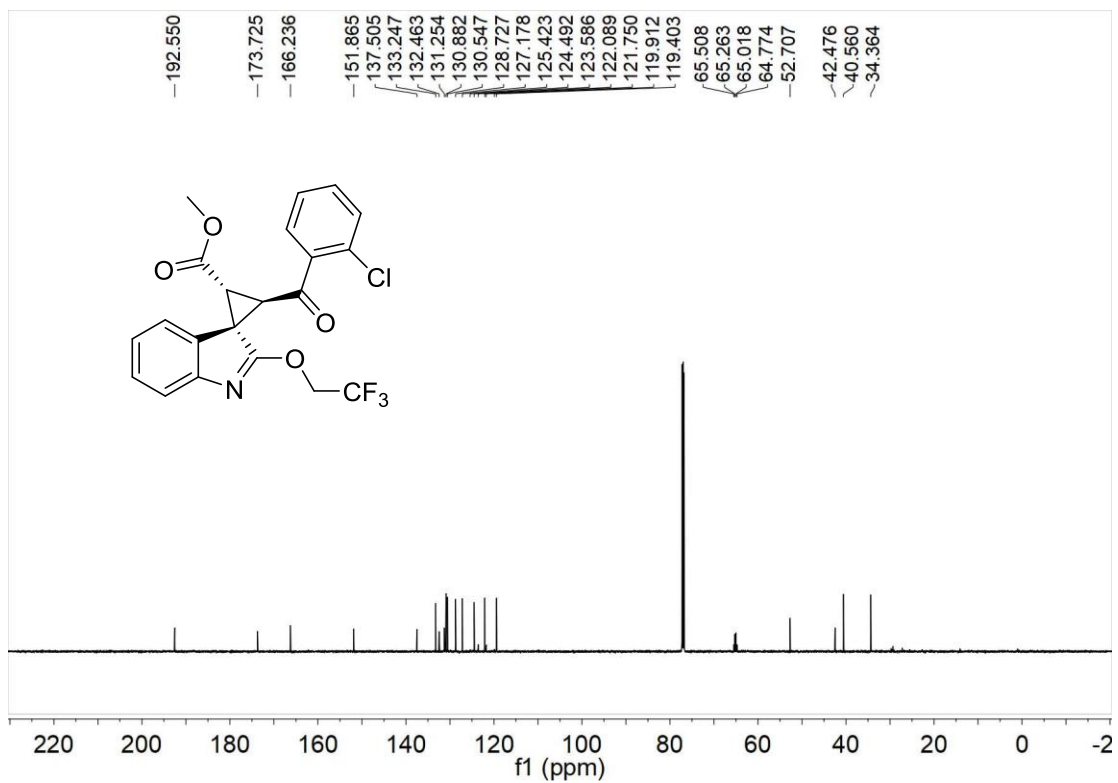

**Figure 31.**  $^{13}\text{C}$  NMR spectrum (151 MHz,  $\text{CDCl}_3$ ) of **4ja**

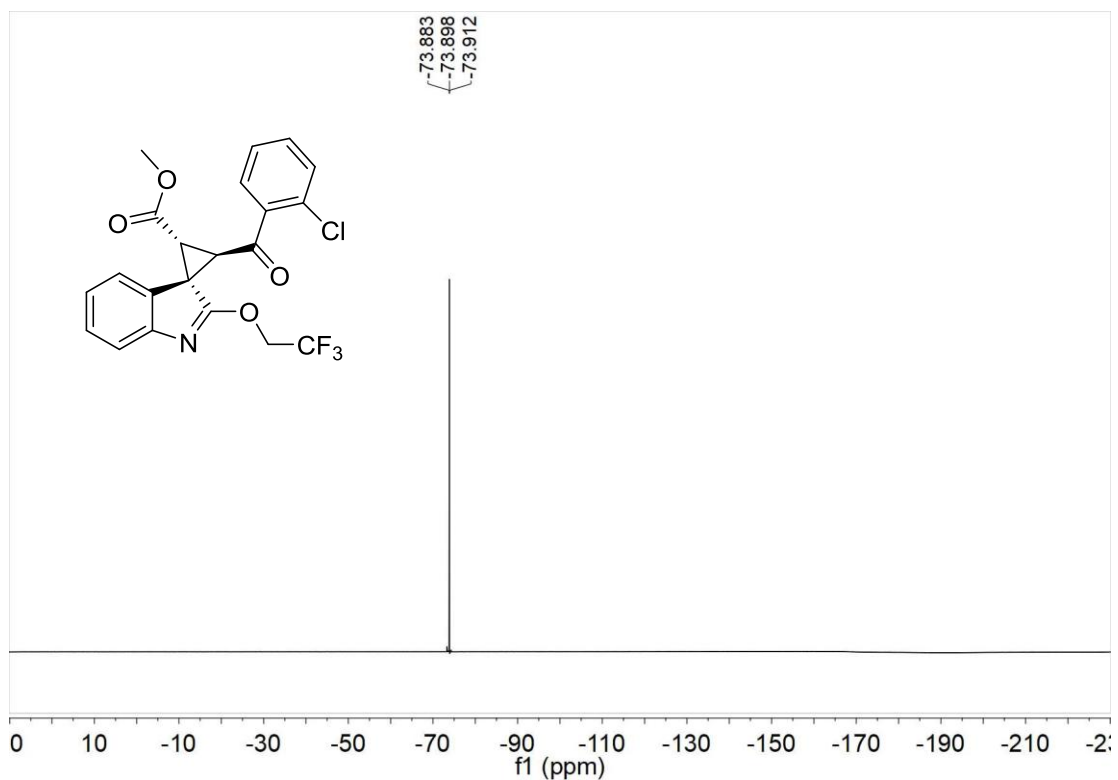

**Figure 32.**  $^{19}\text{F}$  NMR spectrum (565 MHz,  $\text{CDCl}_3$ ) of **4ja**

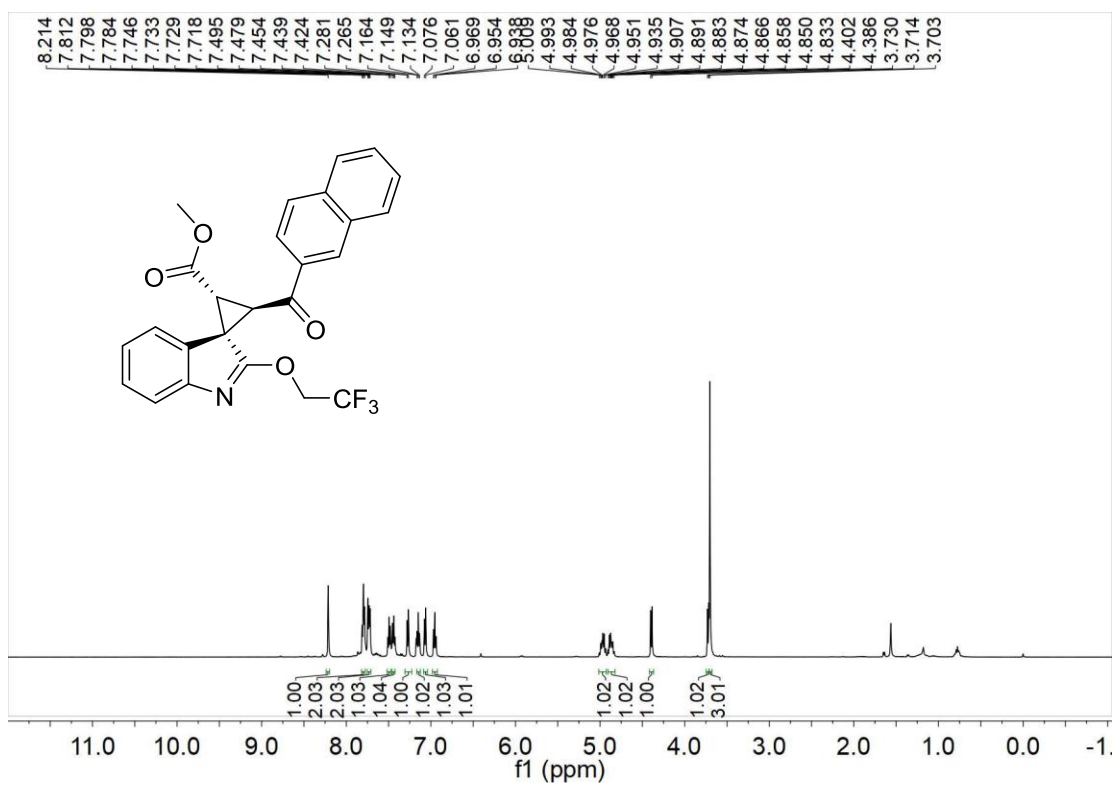

**Figure 33.**  $^1\text{H NMR}$  spectrum (500 MHz,  $\text{CDCl}_3$ ) of **4la**

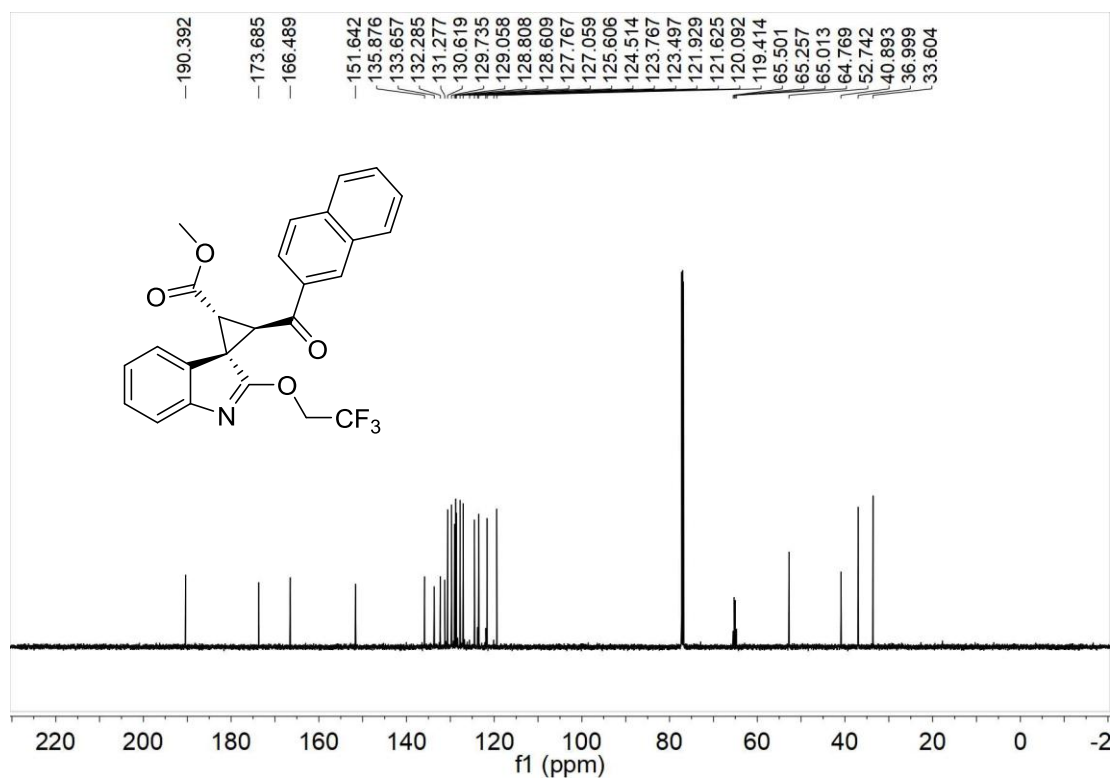

**Figure 34.**  $^{13}\text{C NMR}$  spectrum (151 MHz,  $\text{CDCl}_3$ ) of **4la**

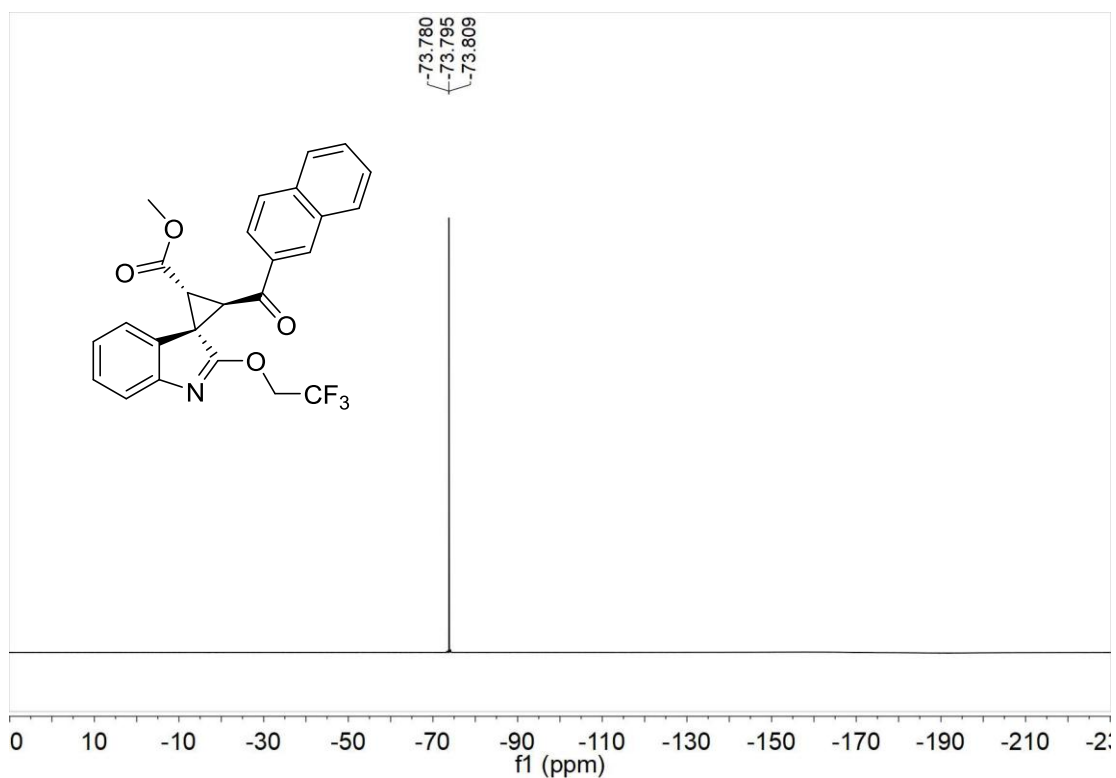

**Figure 35.**  $^{19}\text{F}$  NMR spectrum (565 MHz,  $\text{CDCl}_3$ ) of **4la**

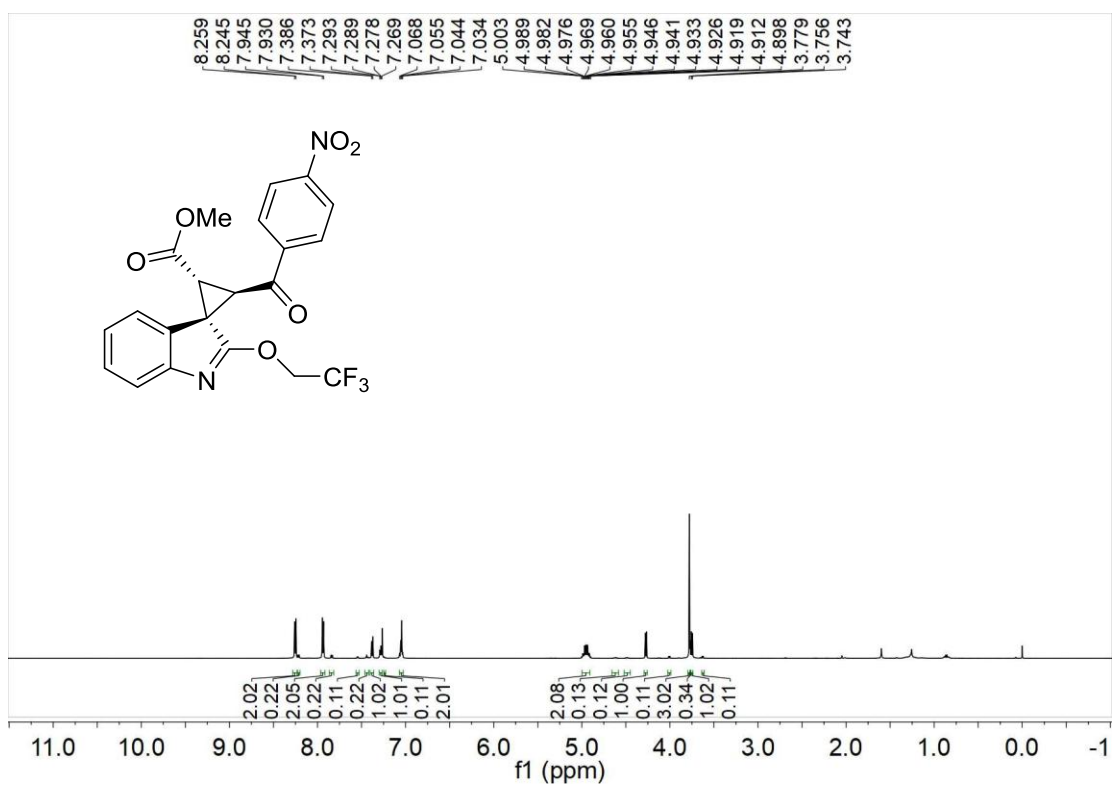

**Figure 36.**  $^1\text{H}$  NMR spectrum (500 MHz,  $\text{CDCl}_3$ ) of **4ka**

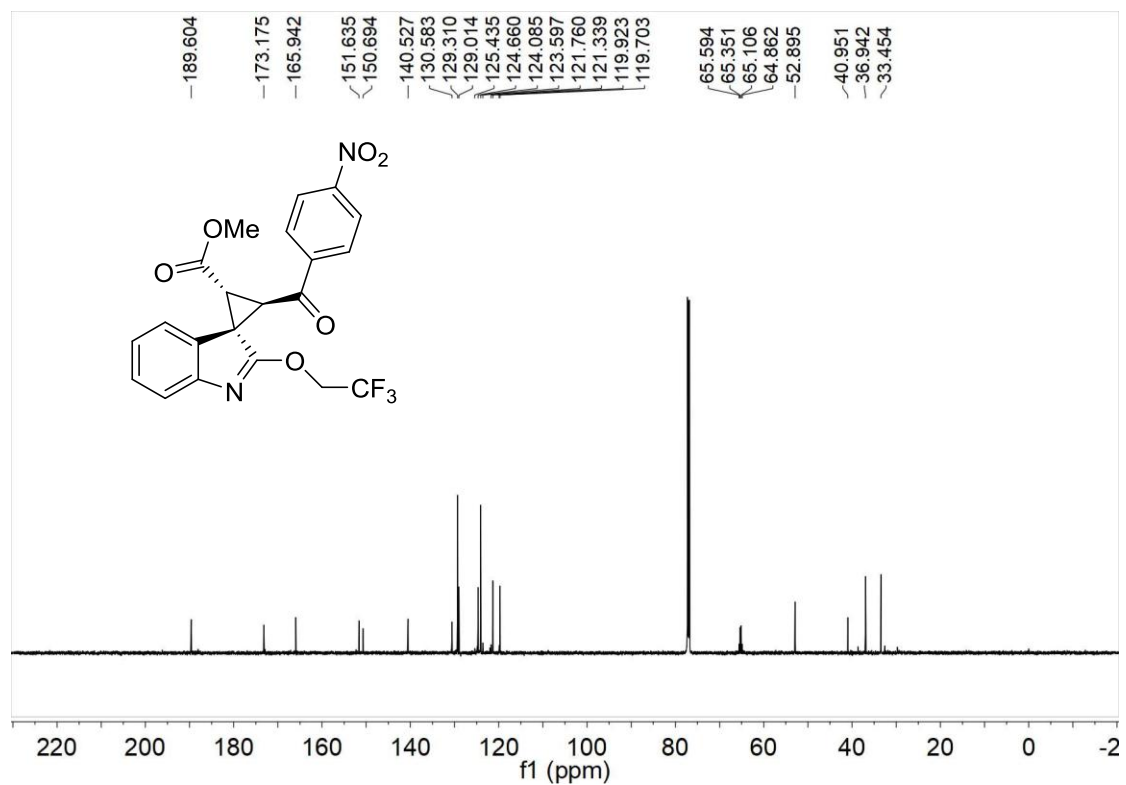

**Figure 37.** <sup>13</sup>C NMR spectrum (151 MHz, CDCl<sub>3</sub>) of **4ka**

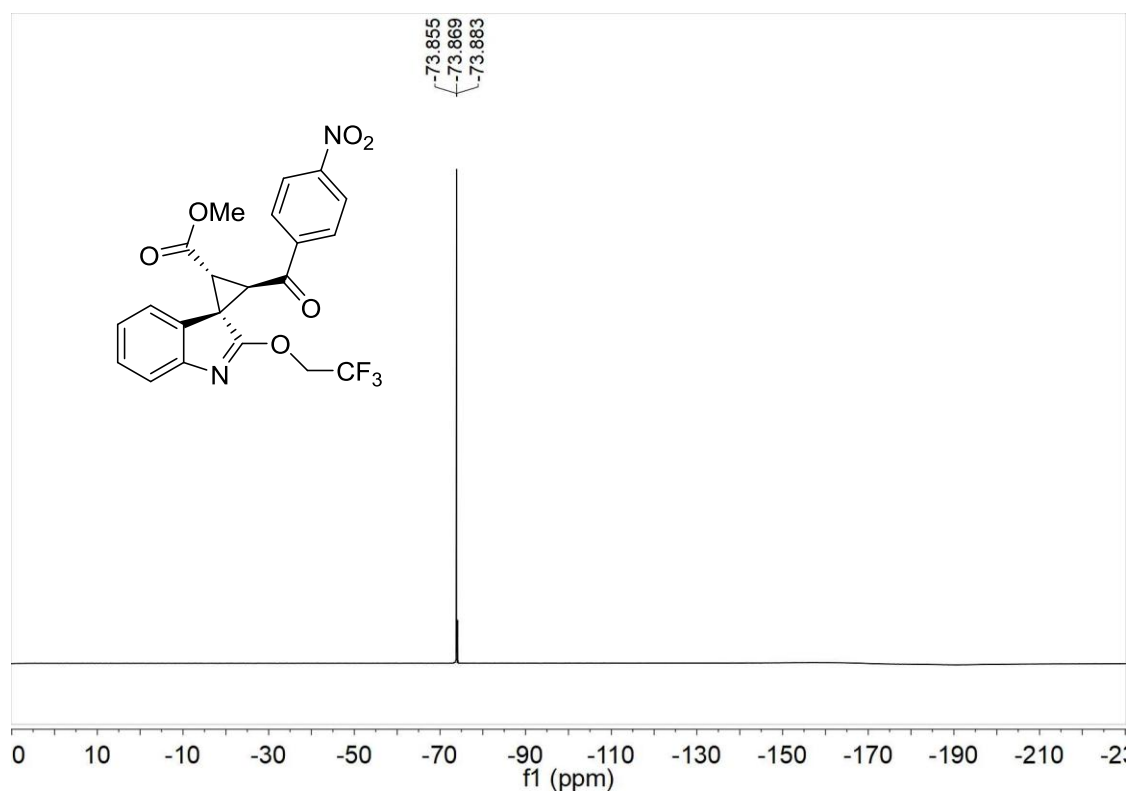

**Figure 38.** <sup>19</sup>F NMR spectrum (565 MHz, CDCl<sub>3</sub>) of **4ka**



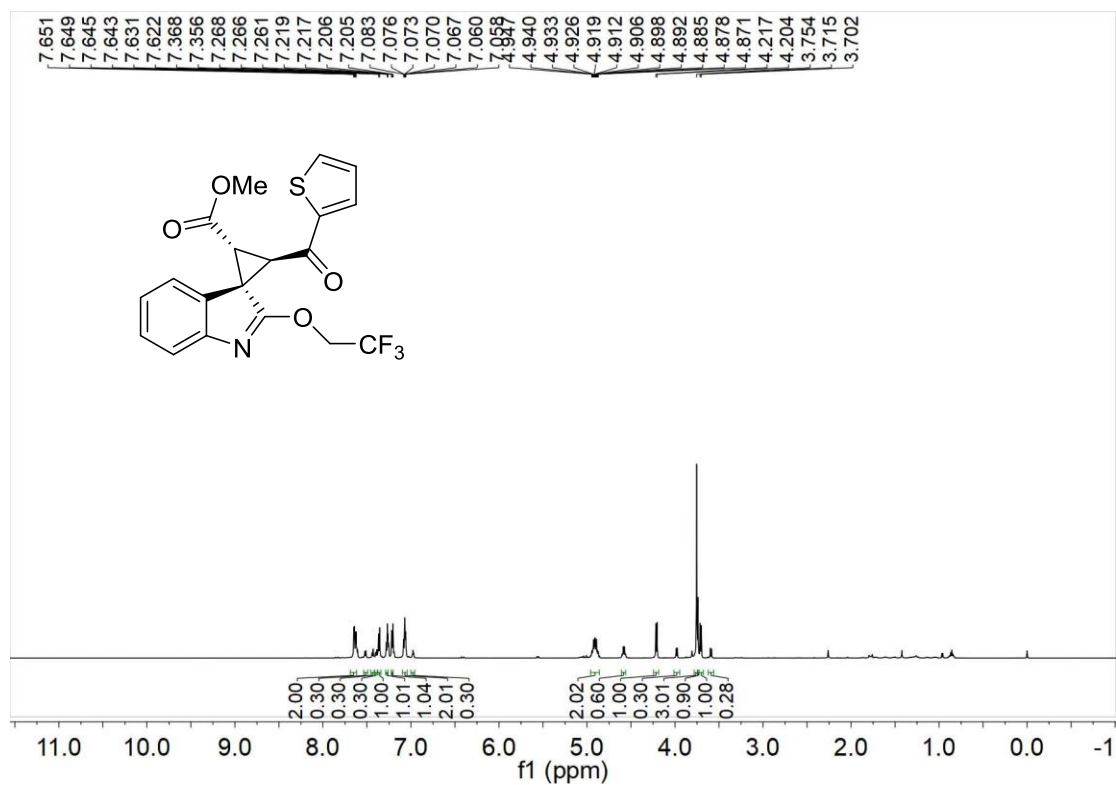

Figure 39.  $^1\text{H}$  NMR spectrum (600 MHz,  $\text{CDCl}_3$ ) of 4ma

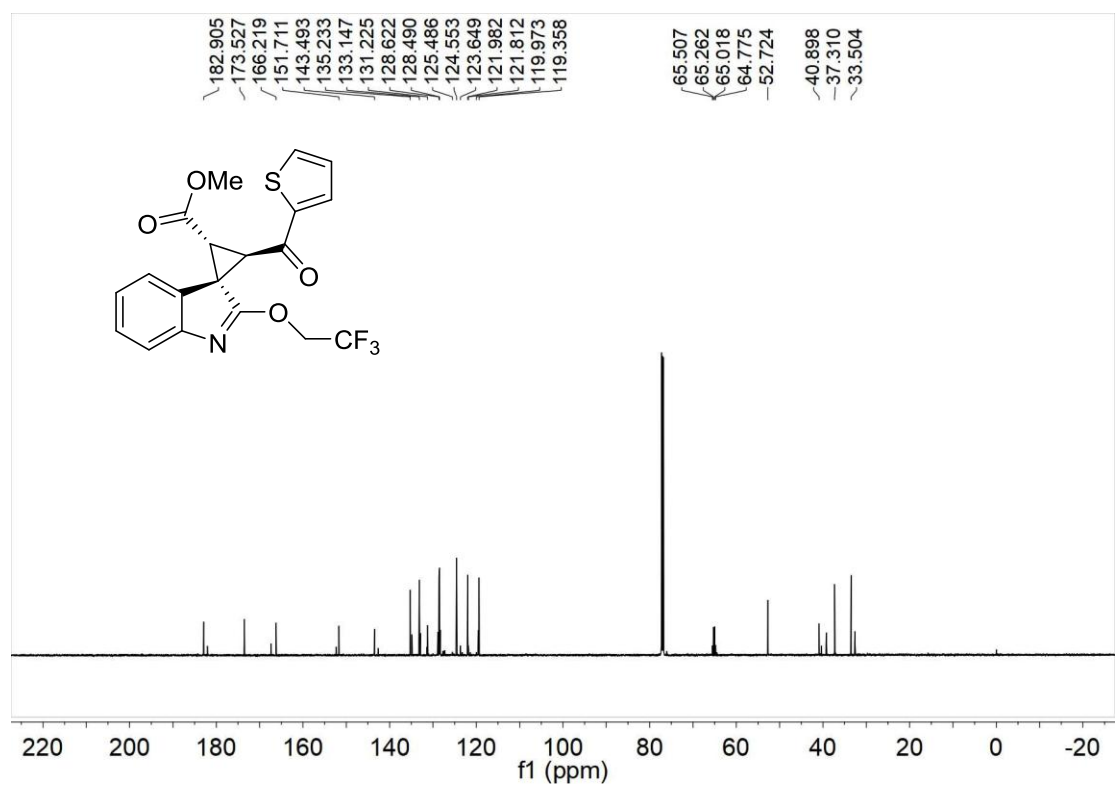

Figure 40.  $^{13}\text{C}$  NMR spectrum (151 MHz,  $\text{CDCl}_3$ ) of 4ma

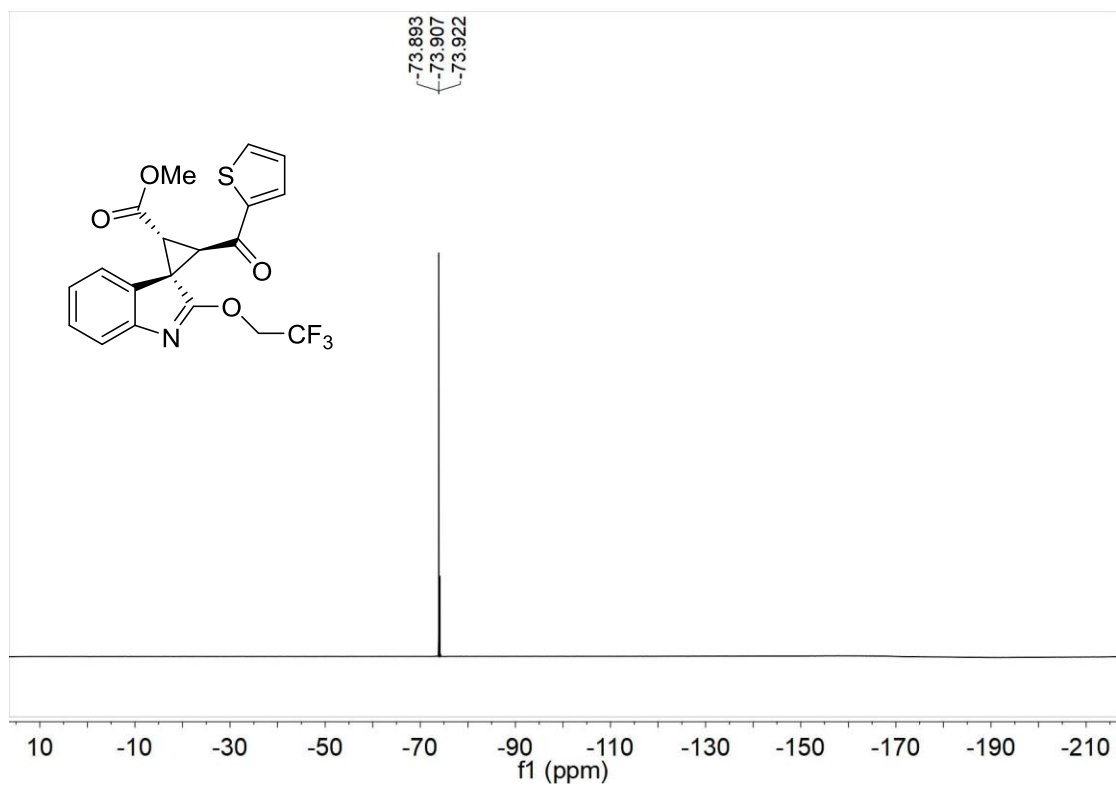

**Figure 41.**  $^{19}\text{F}$  NMR spectrum (565 MHz,  $\text{CDCl}_3$ ) of **4ma**

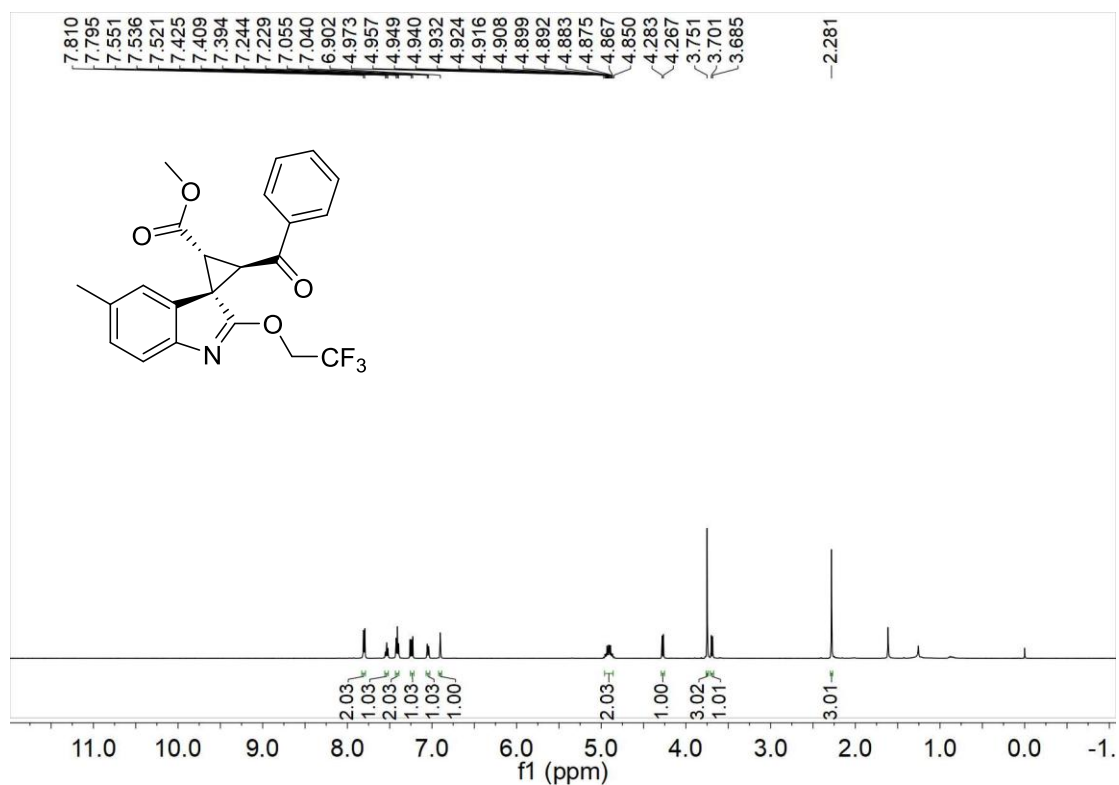

**Figure 42.**  $^1\text{H}$  NMR spectrum (500 MHz,  $\text{CDCl}_3$ ) of **4ab**

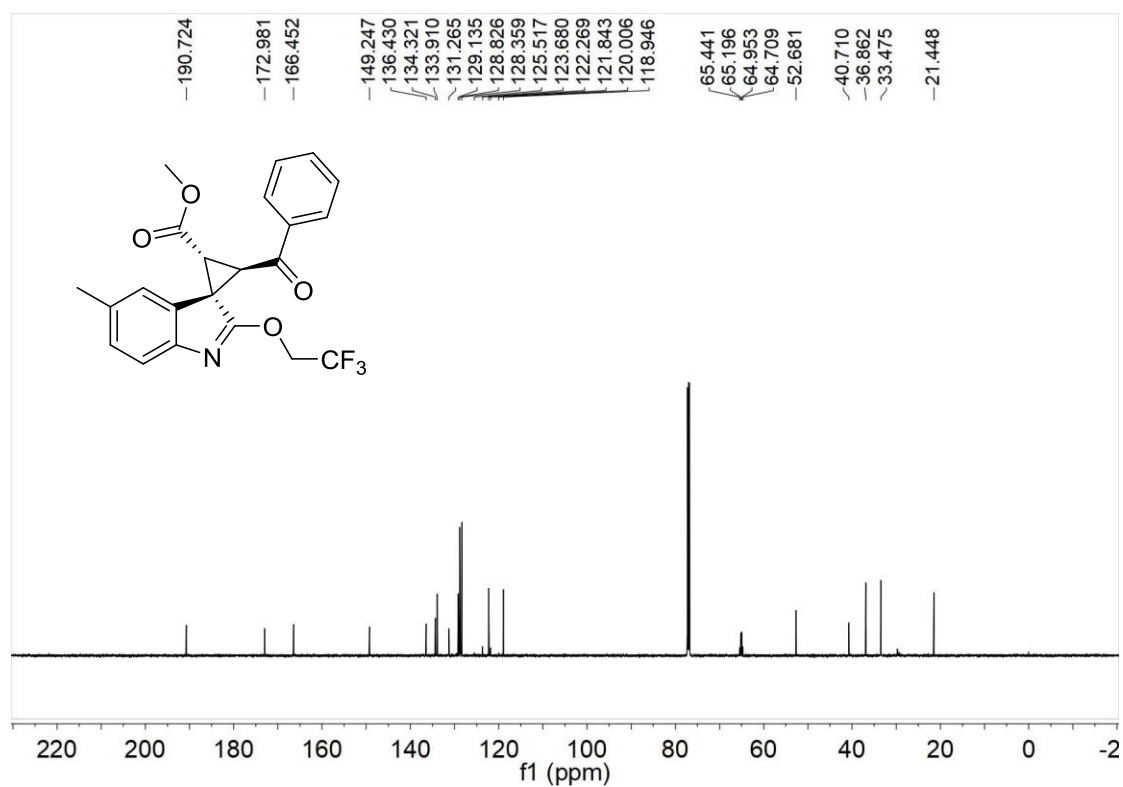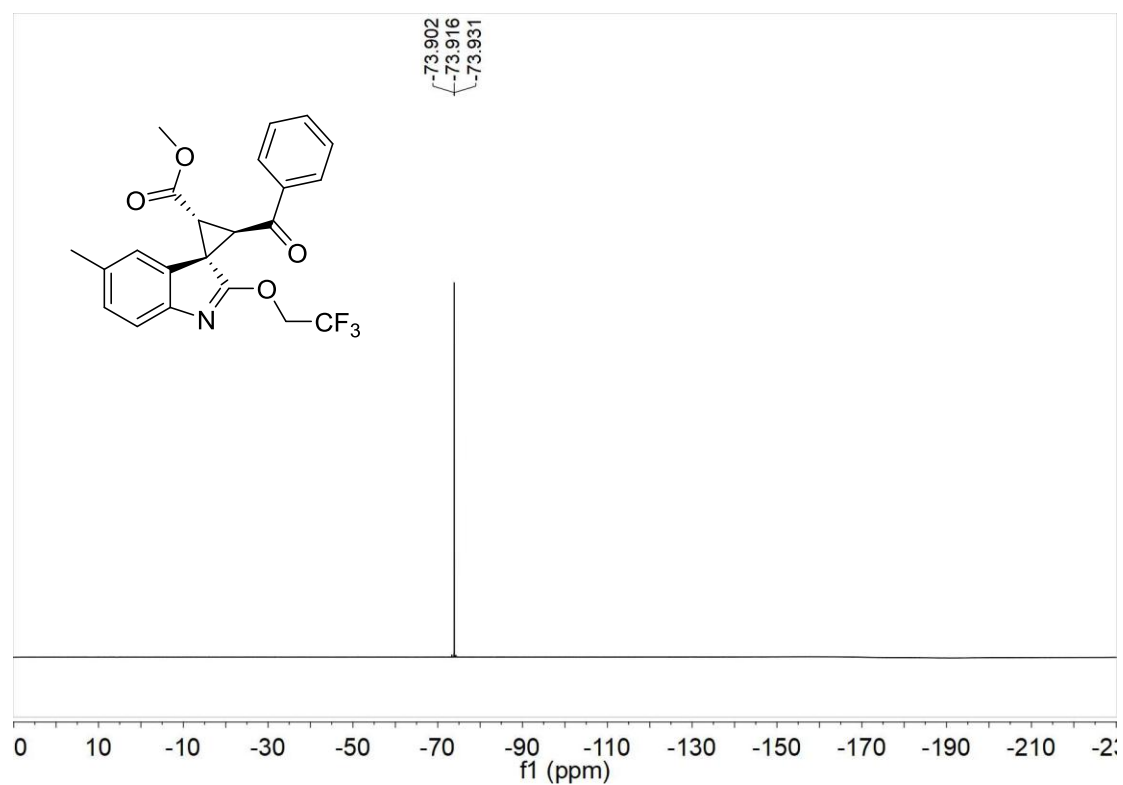

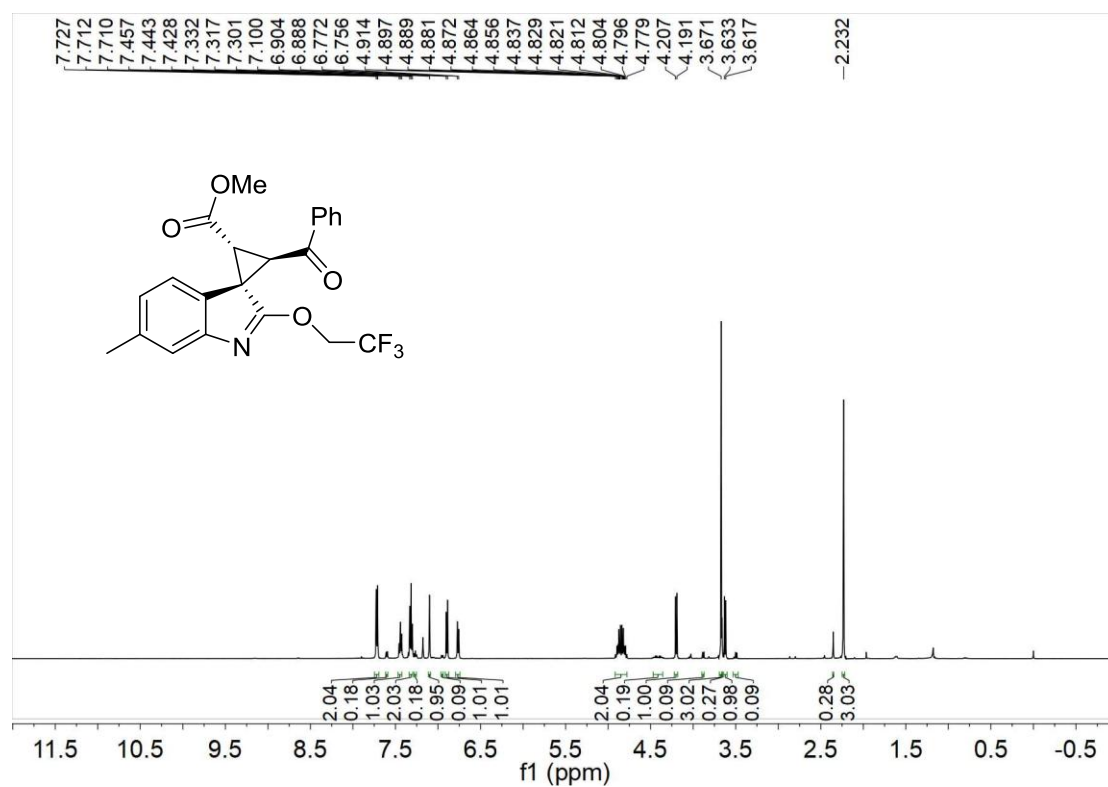

**Figure 45.**  $^1\text{H}$  NMR spectrum (500 MHz,  $\text{CDCl}_3$ ) of **4ac**

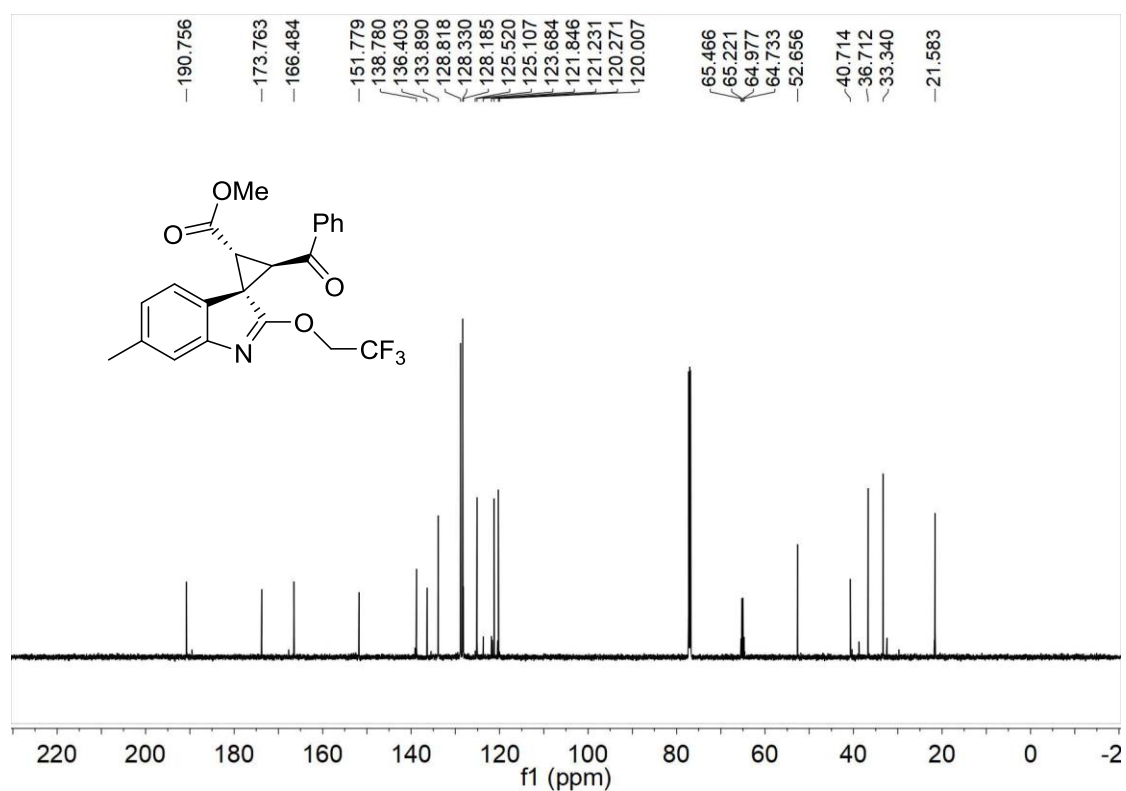

**Figure 46.**  $^{13}\text{C}$  NMR spectrum (151 MHz,  $\text{CDCl}_3$ ) of **4ac**

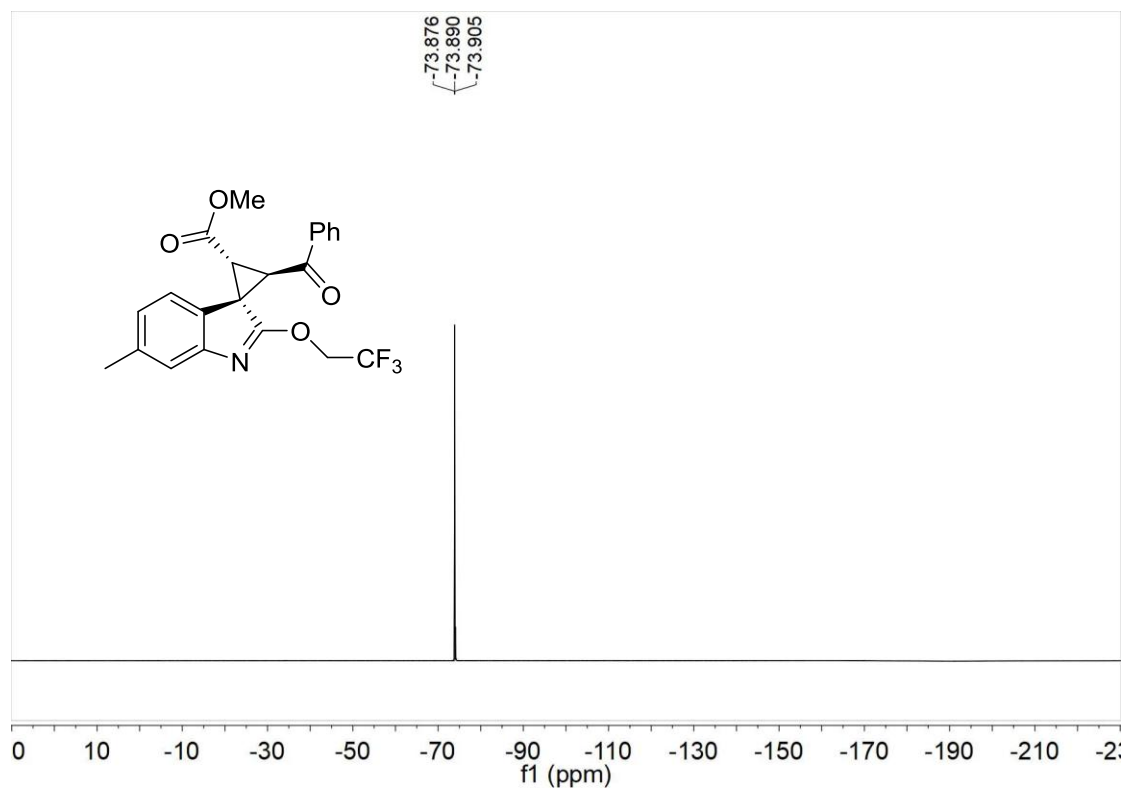

**Figure 47.**  $^{19}\text{F}$  NMR spectrum (565 MHz,  $\text{CDCl}_3$ ) of **4ac**

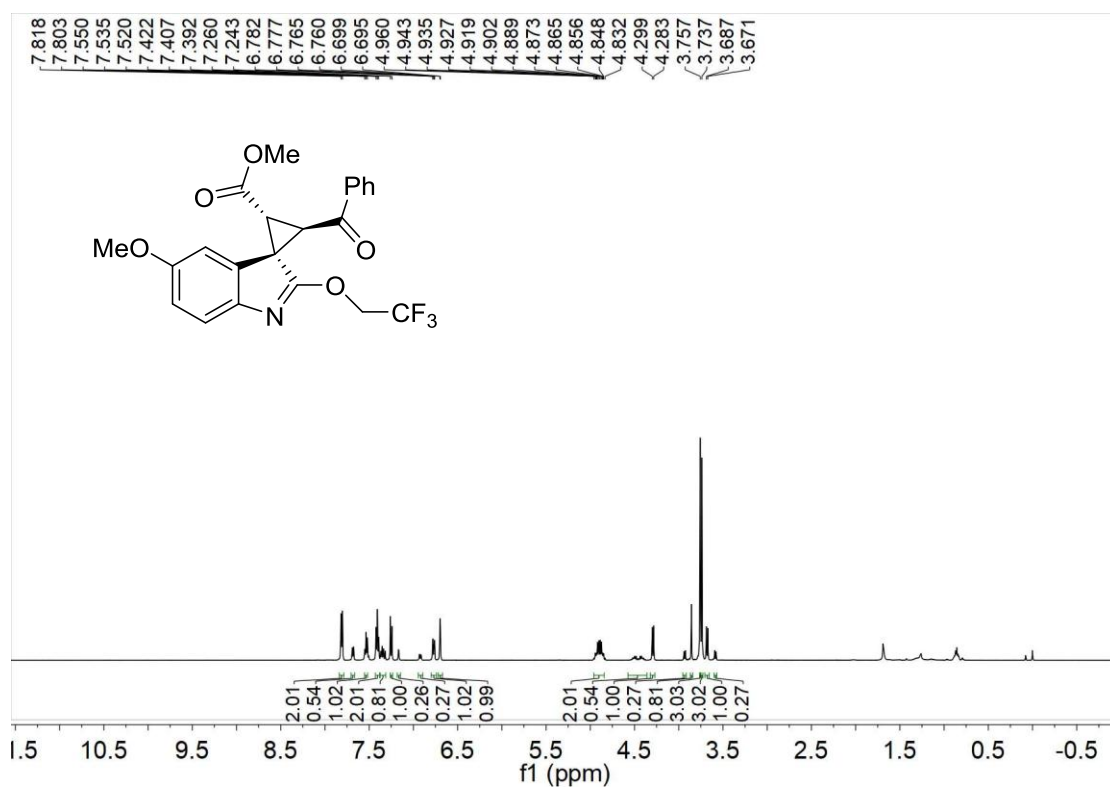

**Figure 48.**  $^1\text{H}$  NMR spectrum (500 MHz,  $\text{CDCl}_3$ ) of **4ad**

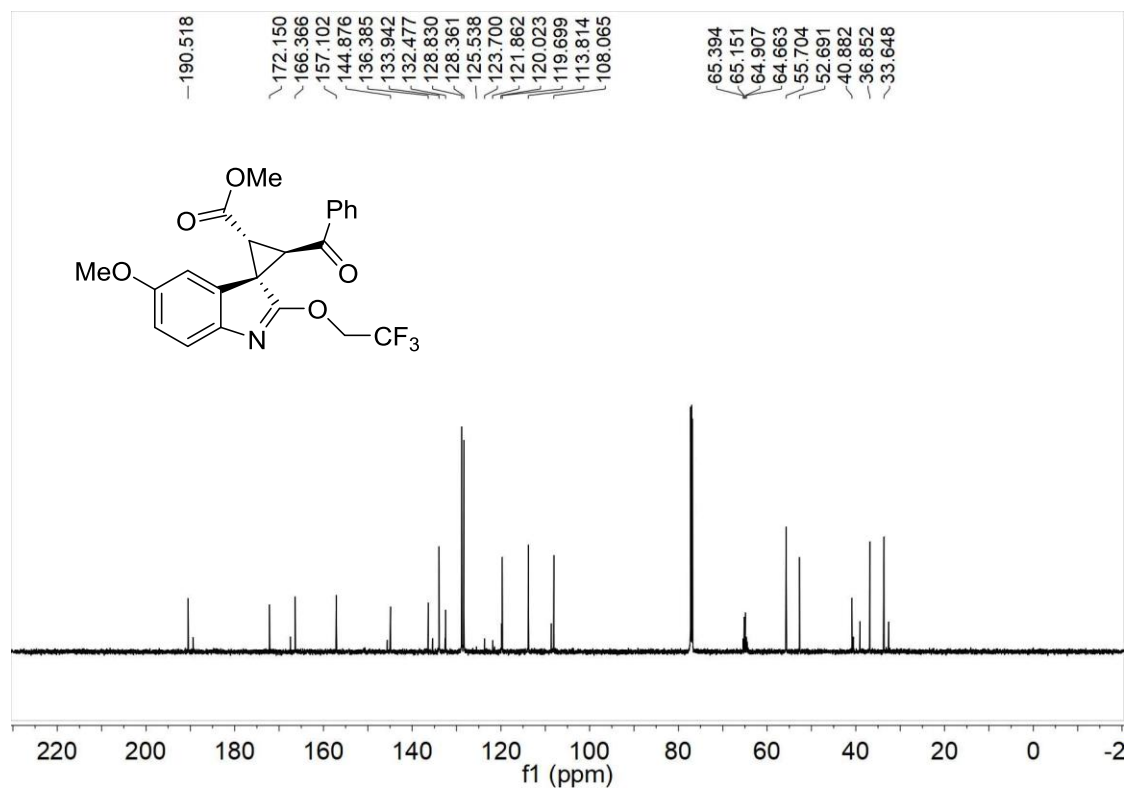

**Figure 49.** <sup>13</sup>C NMR spectrum (151 MHz, CDCl<sub>3</sub>) of **4ad**

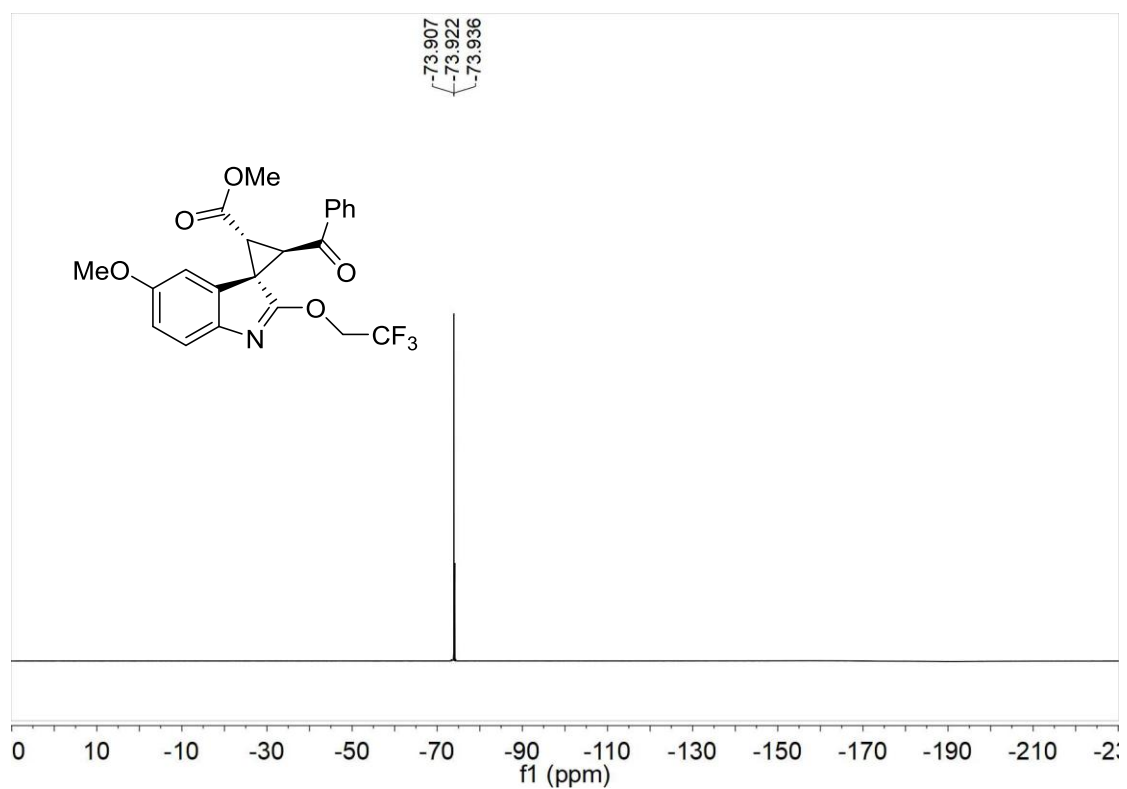

**Figure 50.** <sup>19</sup>F NMR spectrum (565 MHz, CDCl<sub>3</sub>) of **4ad**

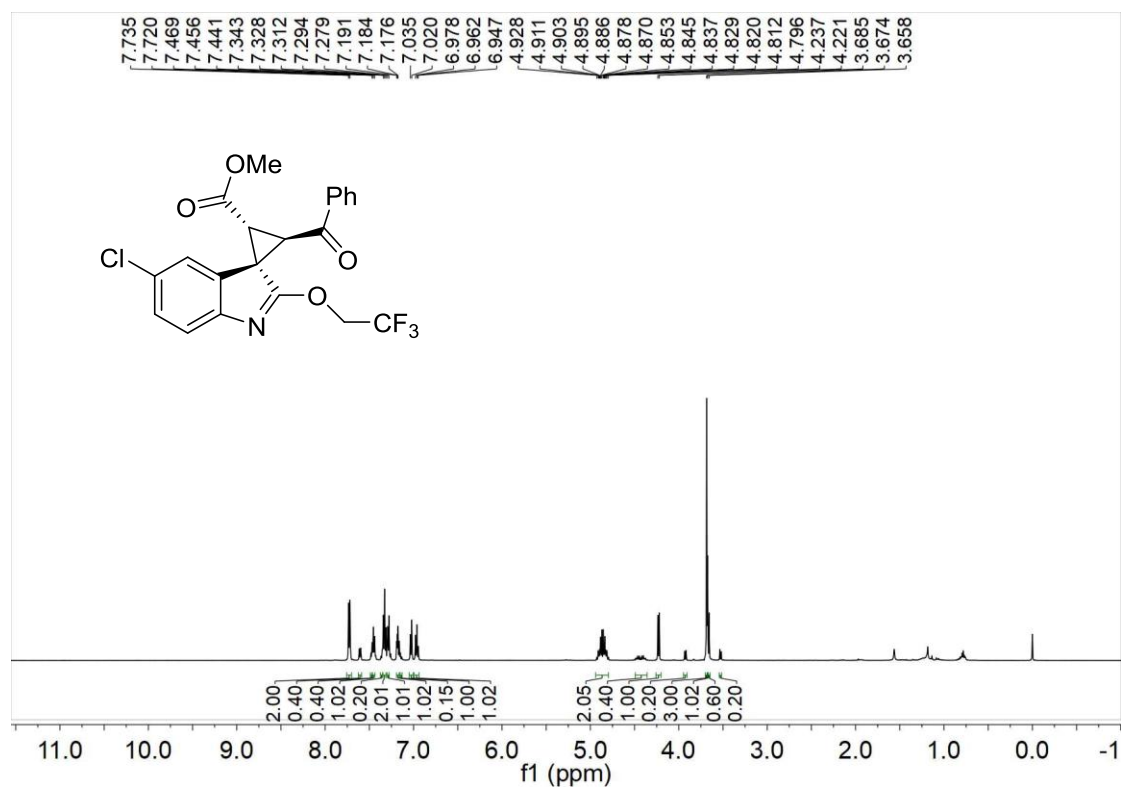

**Figure 51.**  $^1\text{H}$  NMR spectrum (500 MHz,  $\text{CDCl}_3$ ) of **4ae**

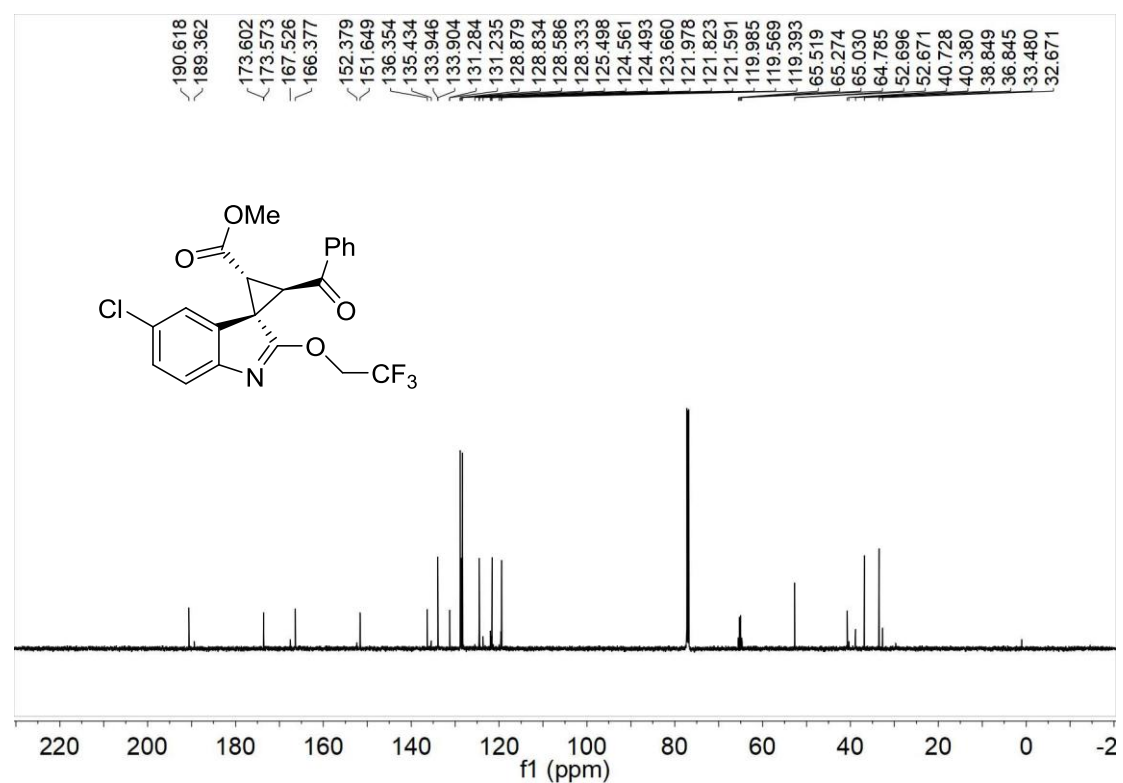

**Figure 52.**  $^{13}\text{C}$  NMR spectrum (151 MHz,  $\text{CDCl}_3$ ) of **4ae**

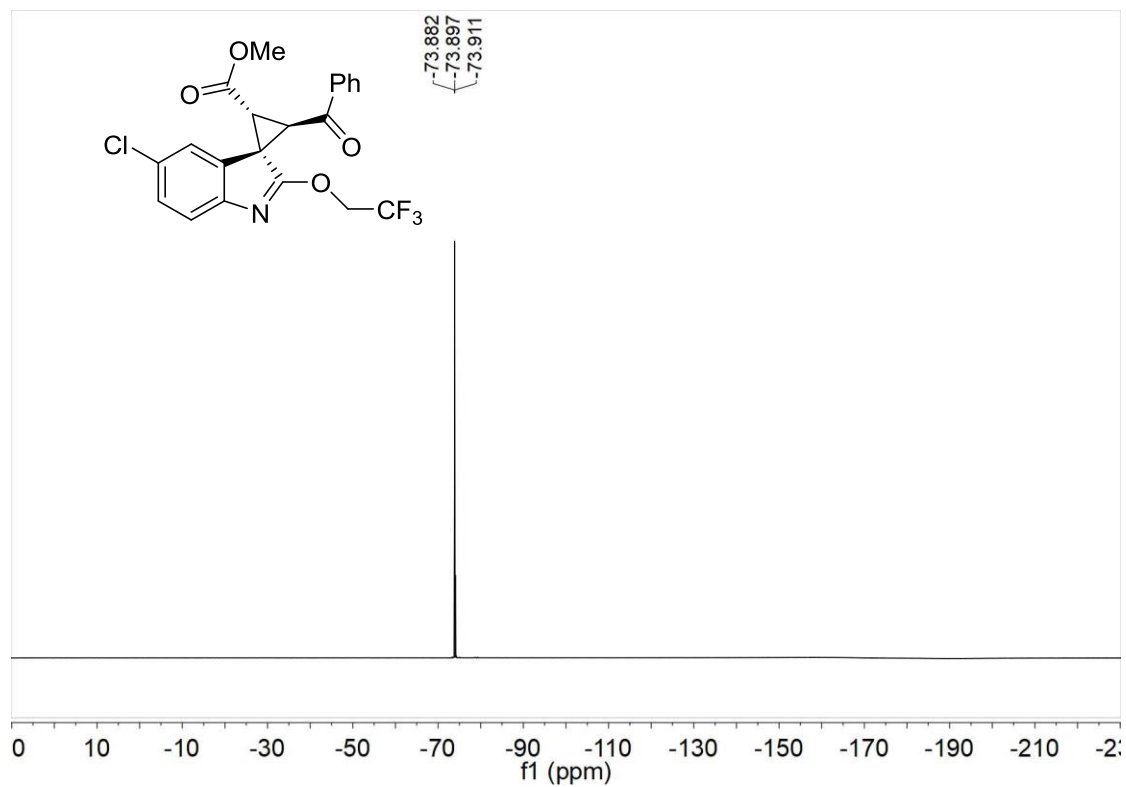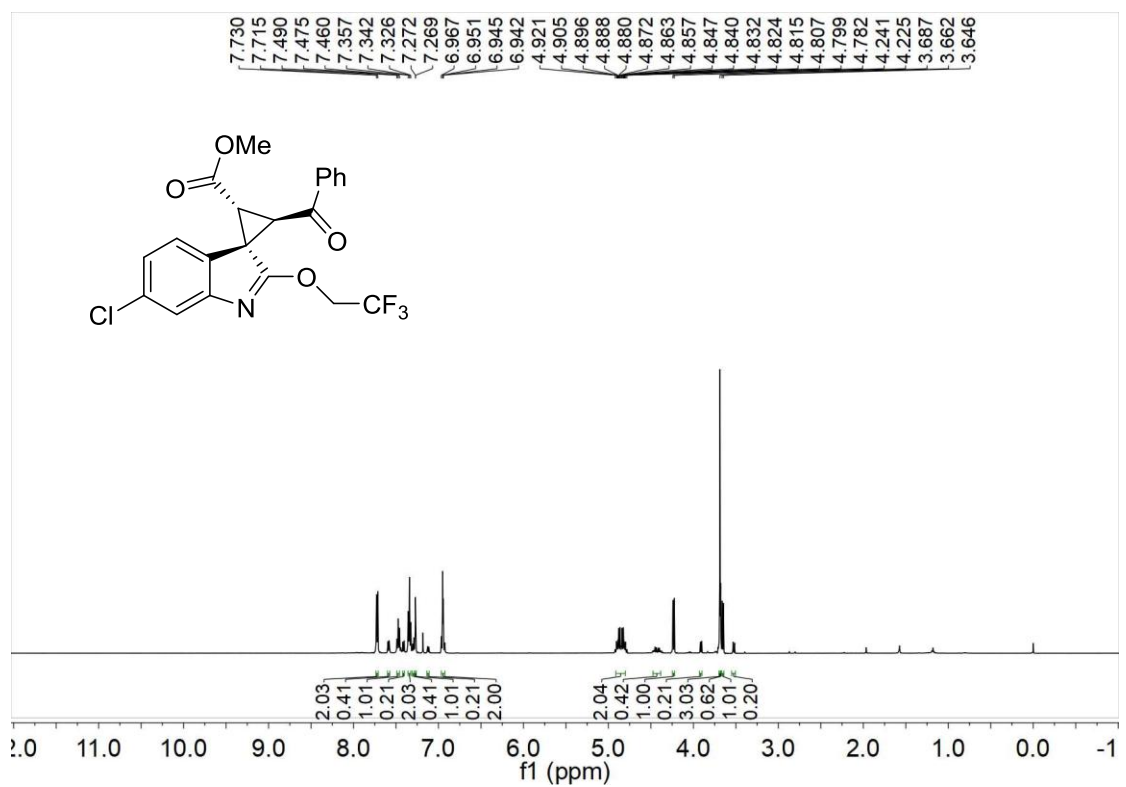



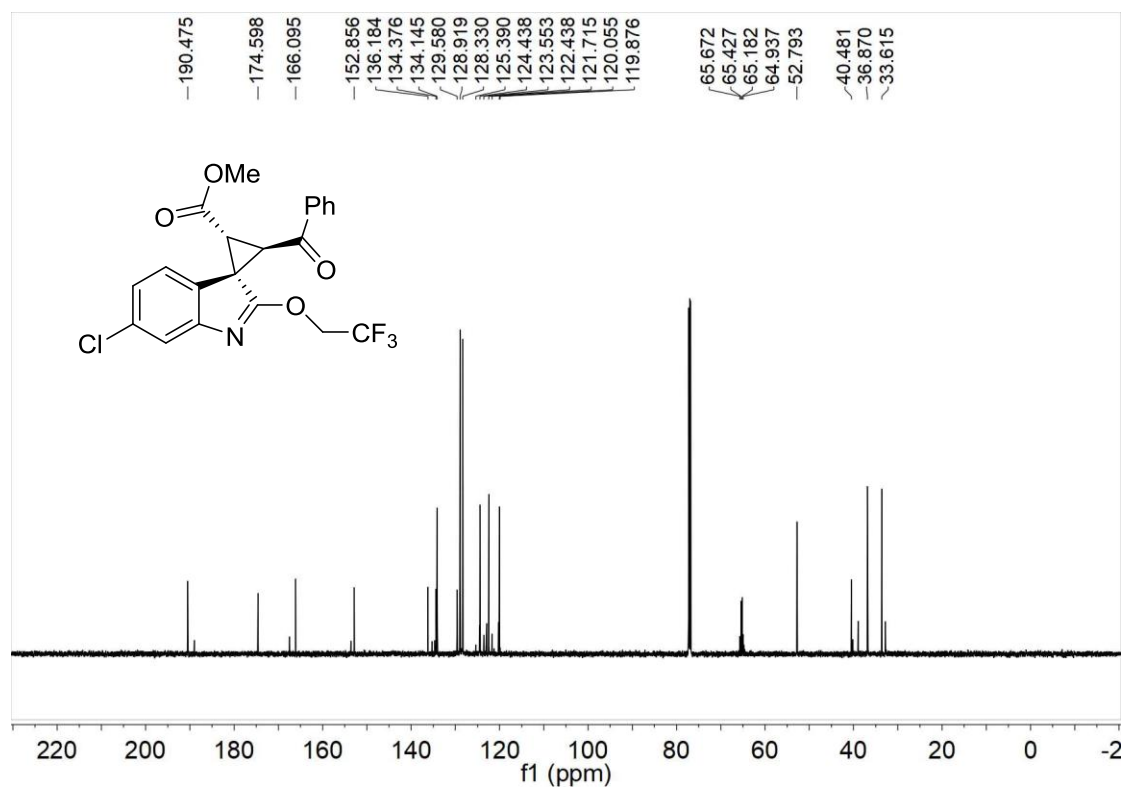

**Figure 55.** <sup>13</sup>C NMR spectrum (151 MHz, CDCl<sub>3</sub>) of **4af**

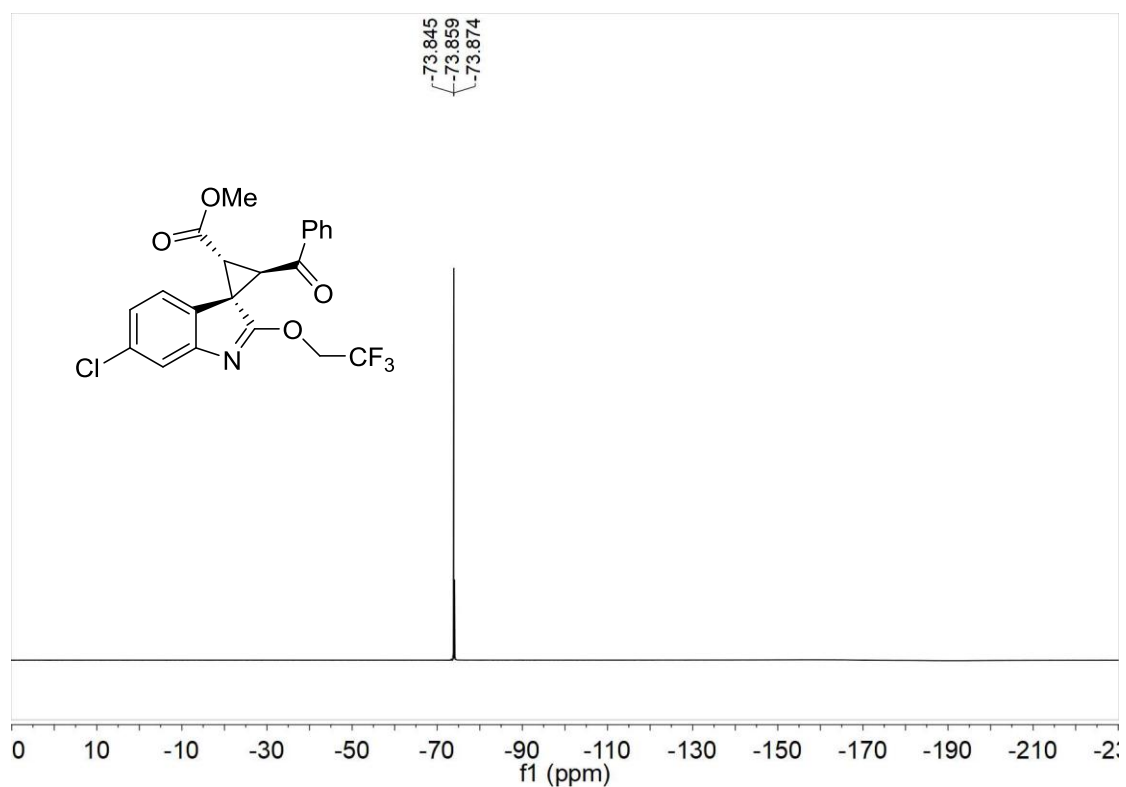

**Figure 56.** <sup>19</sup>F NMR spectrum (565 MHz, CDCl<sub>3</sub>) of **4af**

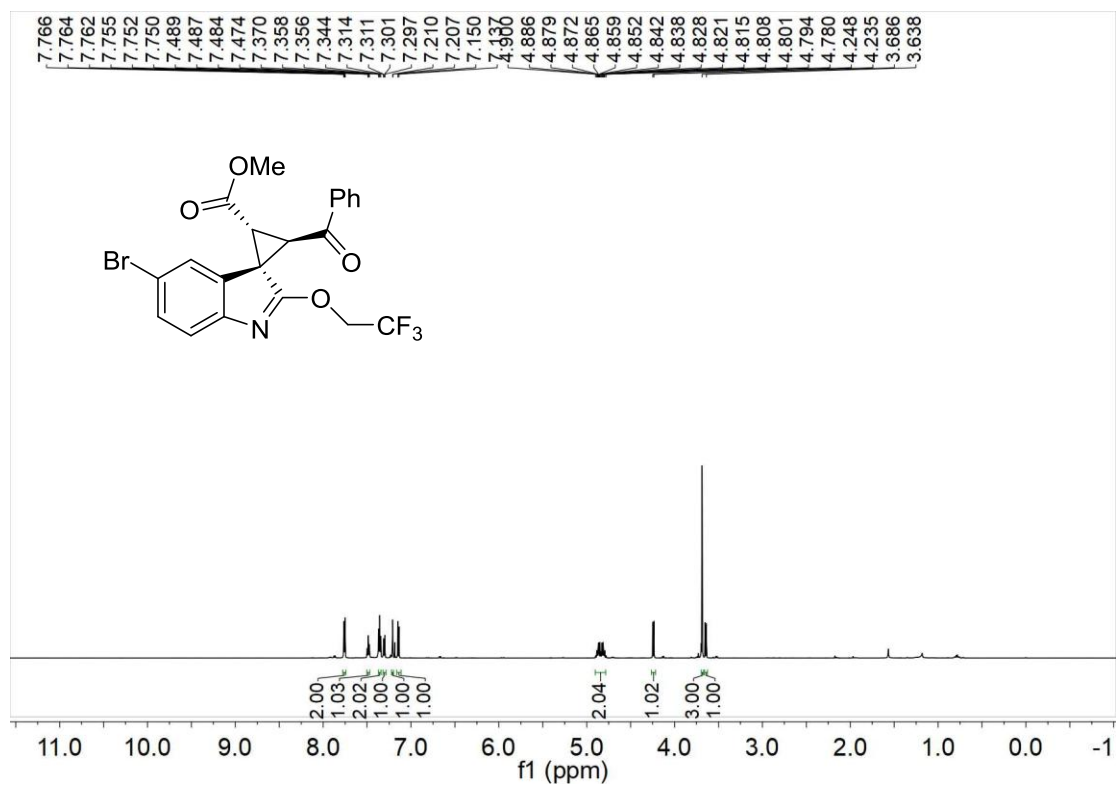

**Figure 57.** <sup>1</sup>H NMR spectrum (600 MHz, CDCl<sub>3</sub>) of **4ag**

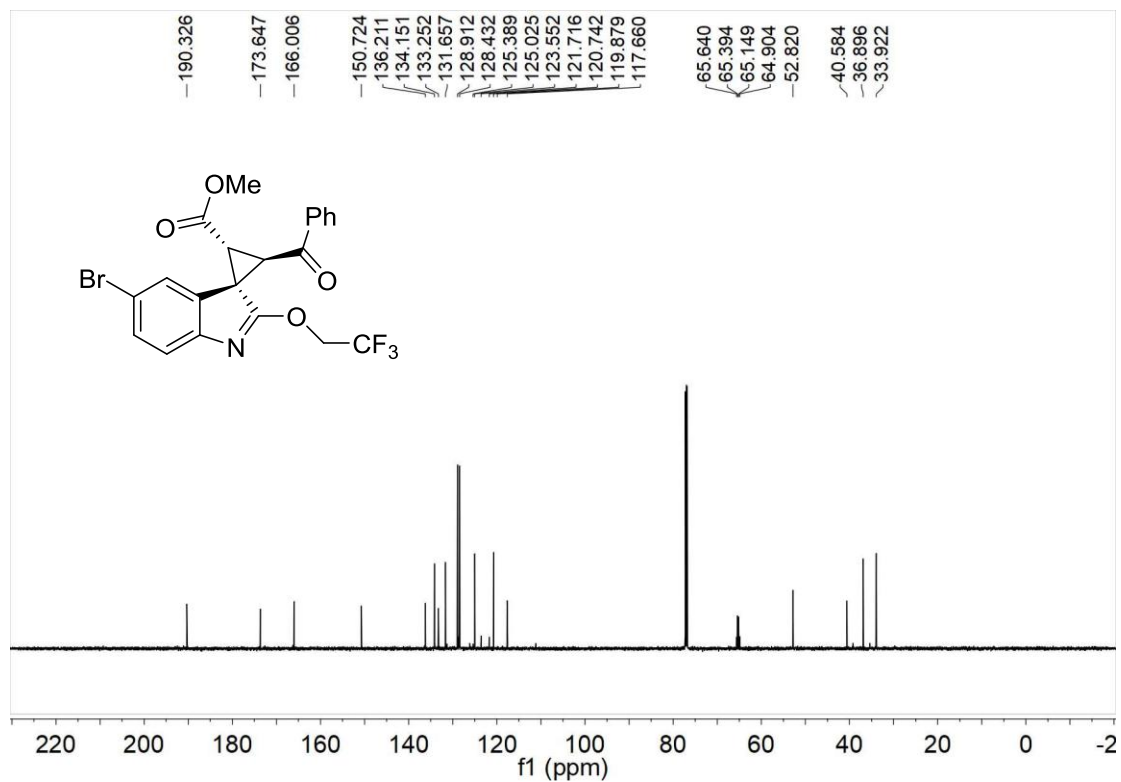

**Figure 58.** <sup>13</sup>C NMR spectrum (151 MHz, CDCl<sub>3</sub>) of **4ag**

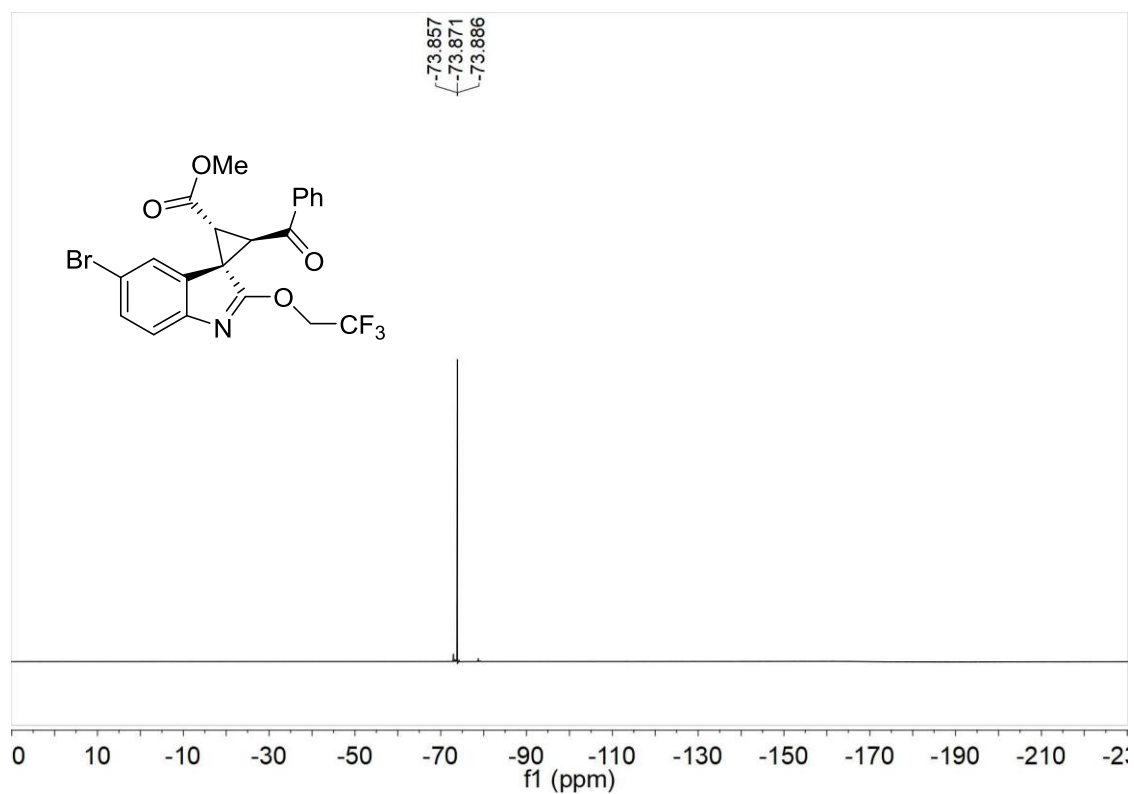

**Figure 59.**  $^{19}\text{F}$  NMR spectrum (565 MHz,  $\text{CDCl}_3$ ) of **4ag**

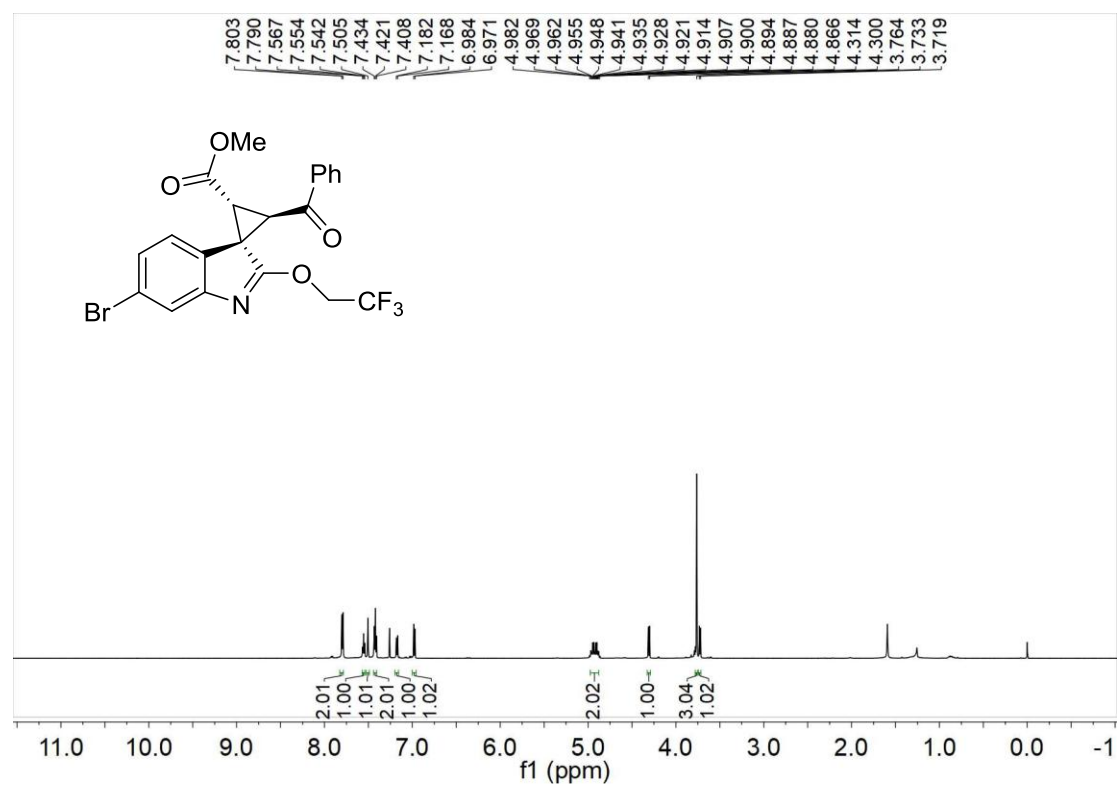

**Figure 60.**  $^1\text{H}$  NMR spectrum (600 MHz,  $\text{CDCl}_3$ ) of **4ah**

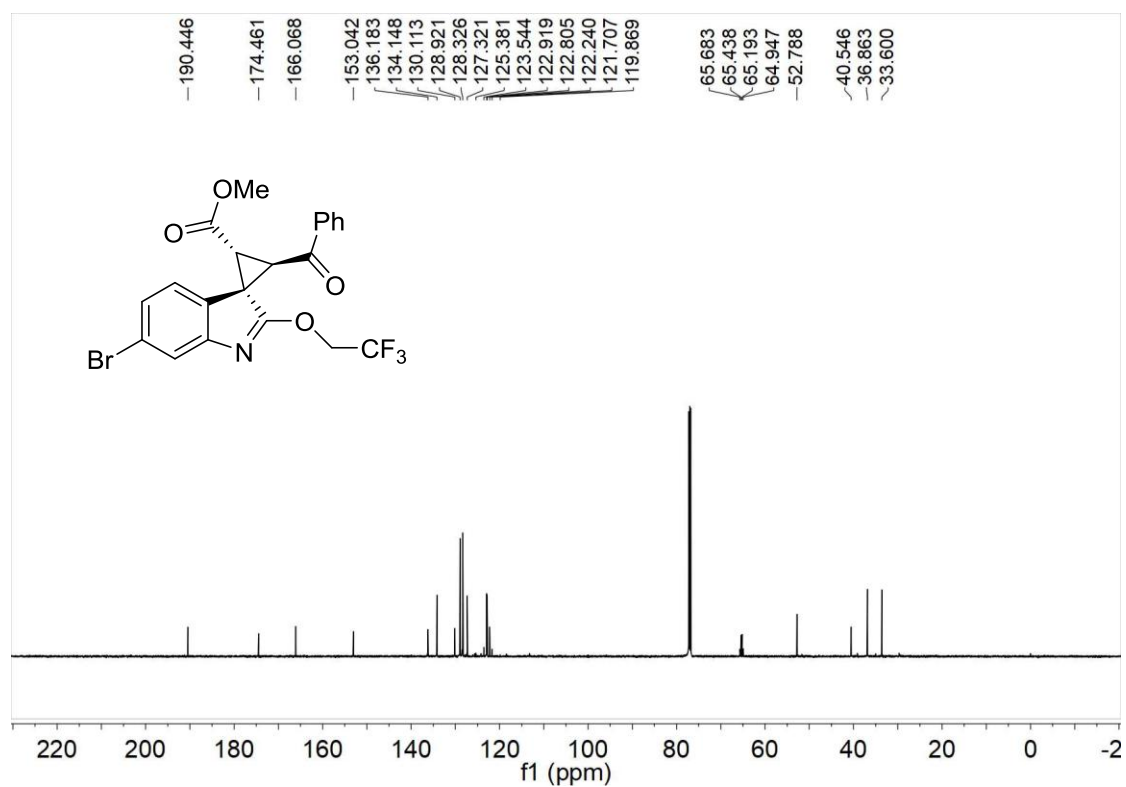

**Figure 61.**  $^{13}\text{C}$  NMR spectrum (151 MHz,  $\text{CDCl}_3$ ) of **4ah**

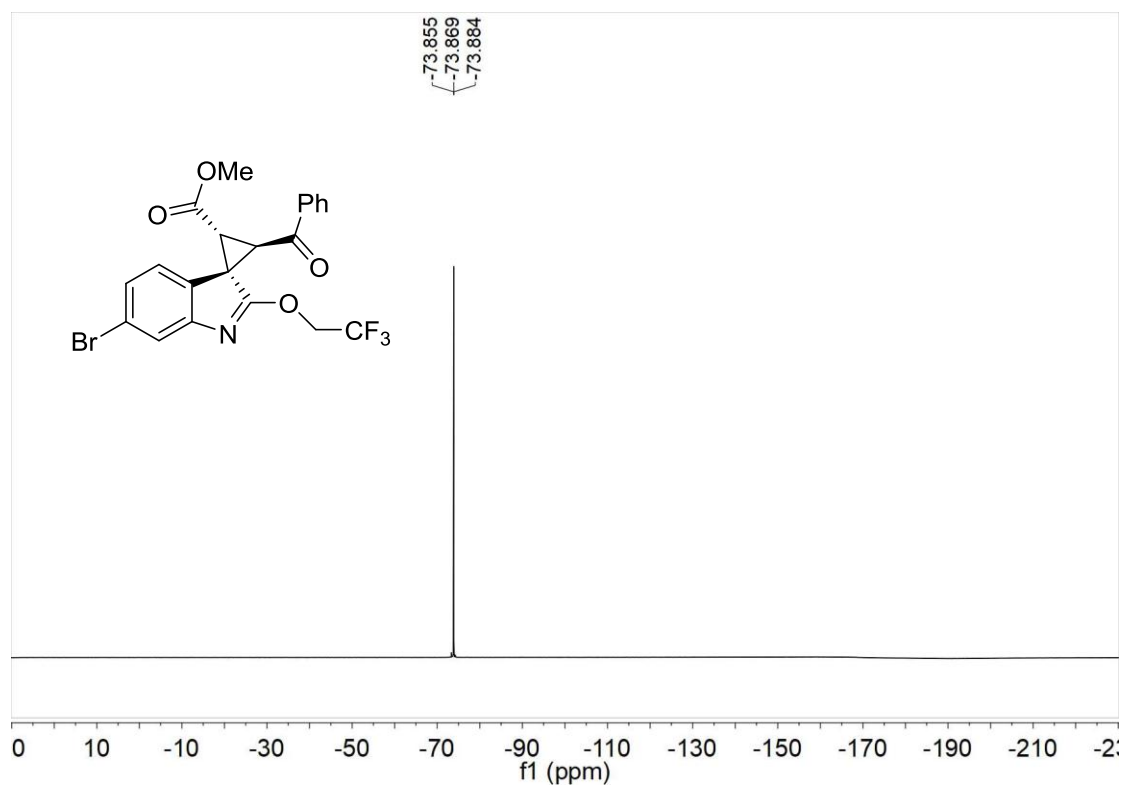

**Figure 62.**  $^{19}\text{F}$  NMR spectrum (565 MHz,  $\text{CDCl}_3$ ) of **4ah**

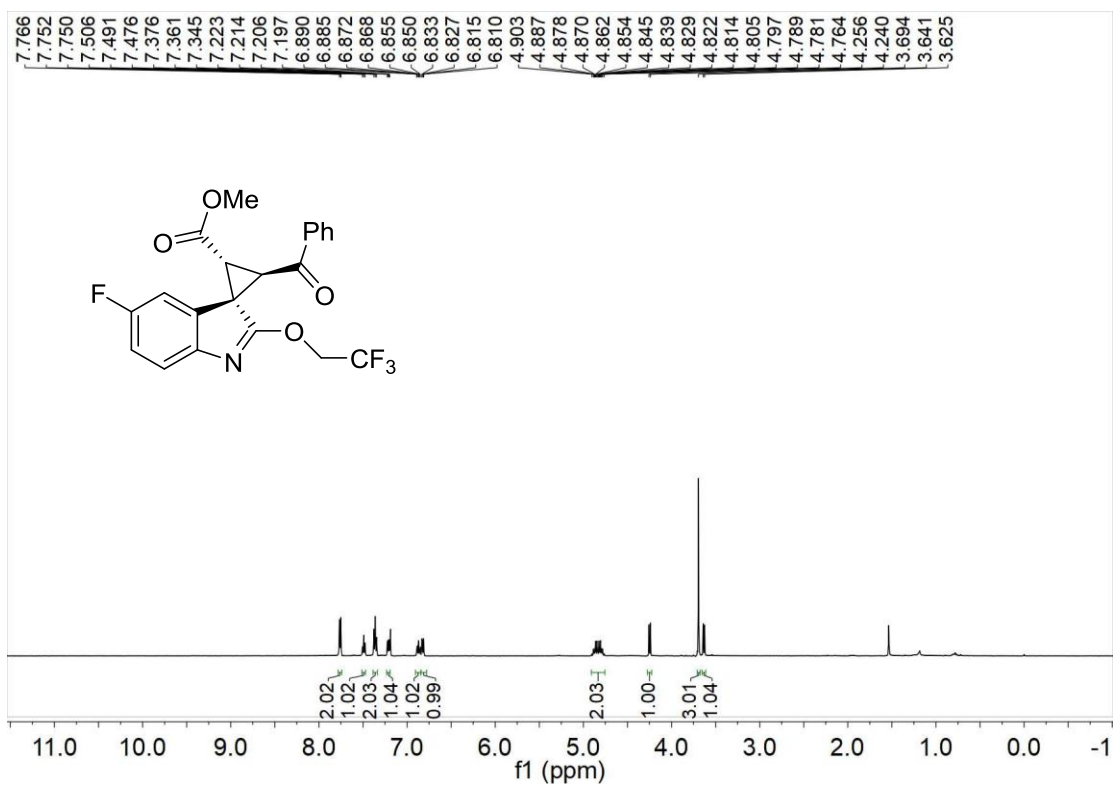

Figure 63. <sup>1</sup>H NMR spectrum (500 MHz, CDCl<sub>3</sub>) of 4ai

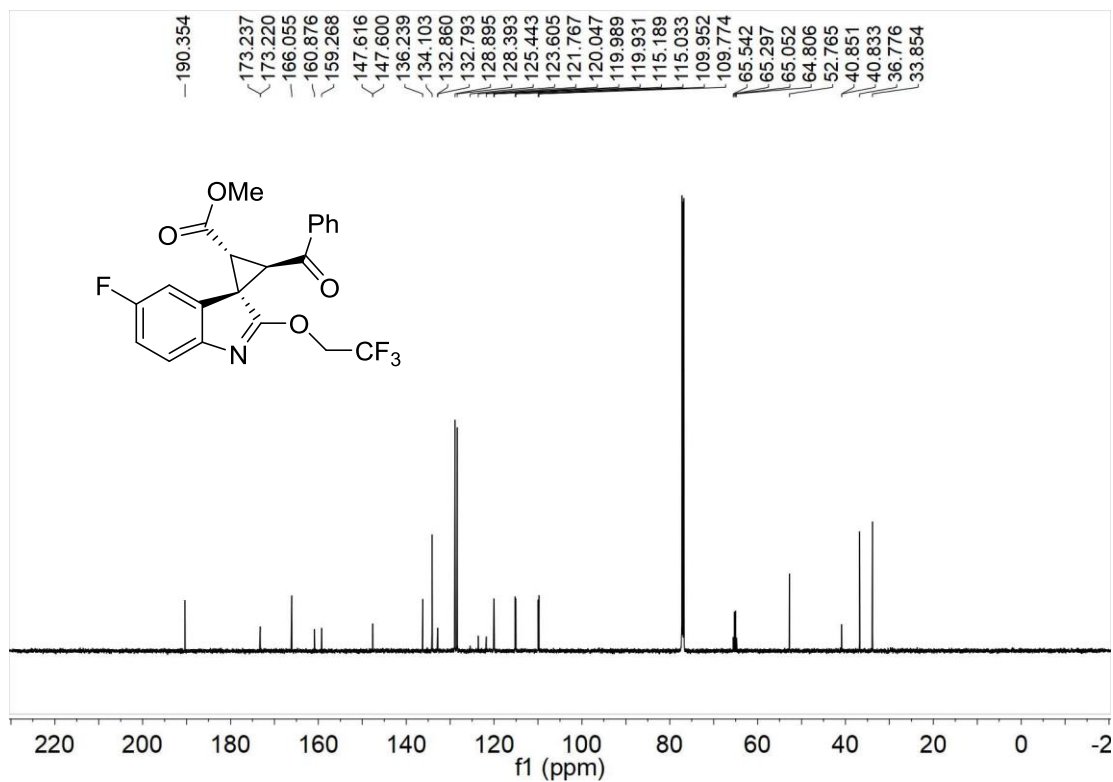

Figure 64. <sup>13</sup>C NMR spectrum (151 MHz, CDCl<sub>3</sub>) of 4ai

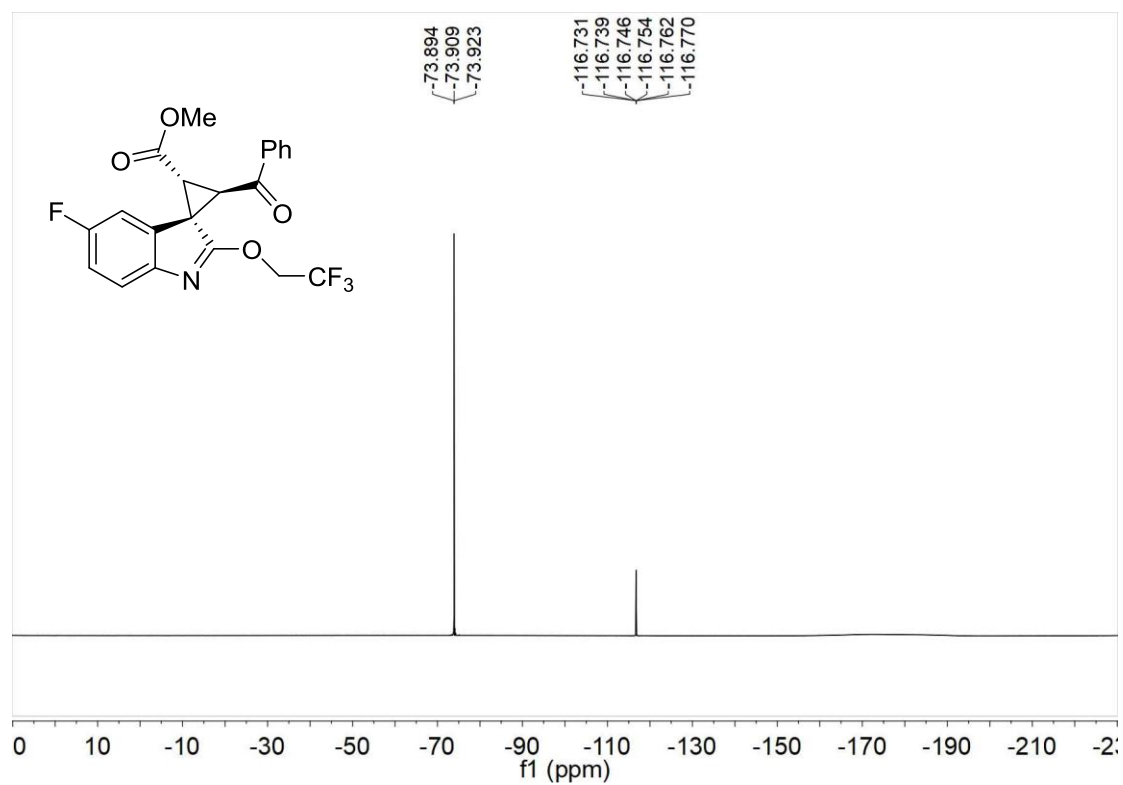

Figure 65.  $^{19}\text{F}$  NMR spectrum (565 MHz,  $\text{CDCl}_3$ ) of 4ai

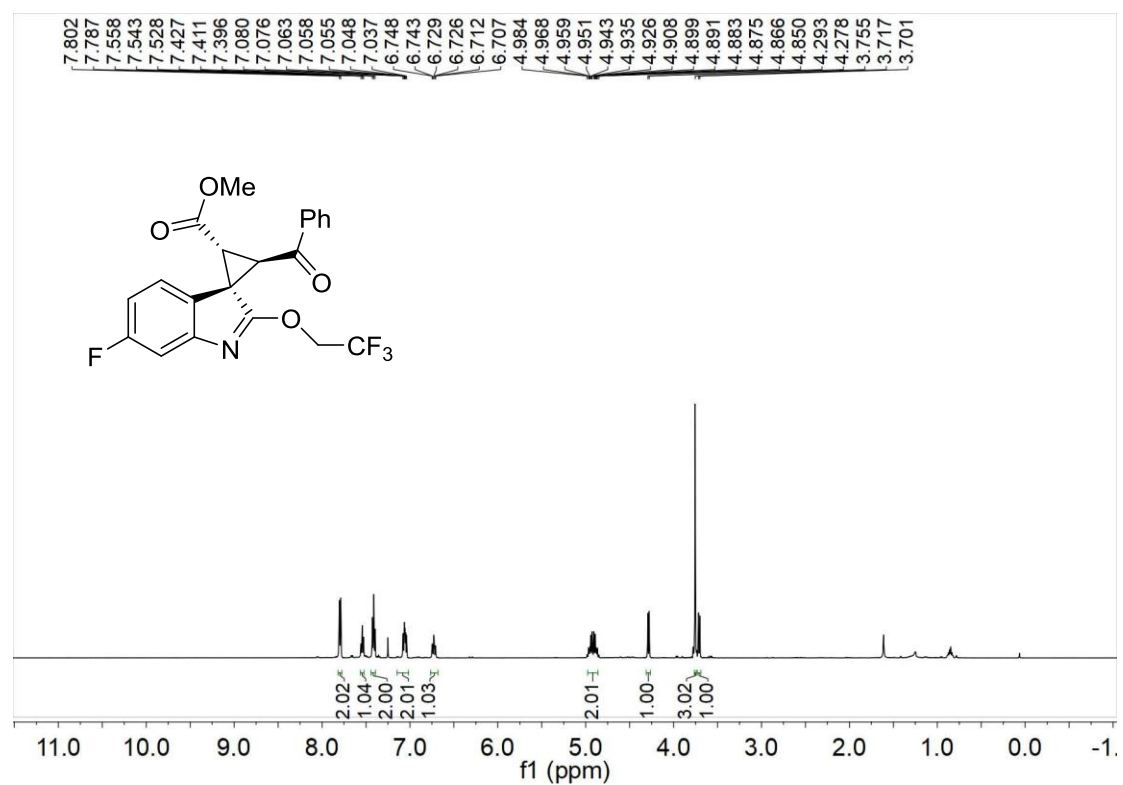

Figure 66.  $^1\text{H}$  NMR spectrum (500 MHz,  $\text{CDCl}_3$ ) of 4aj

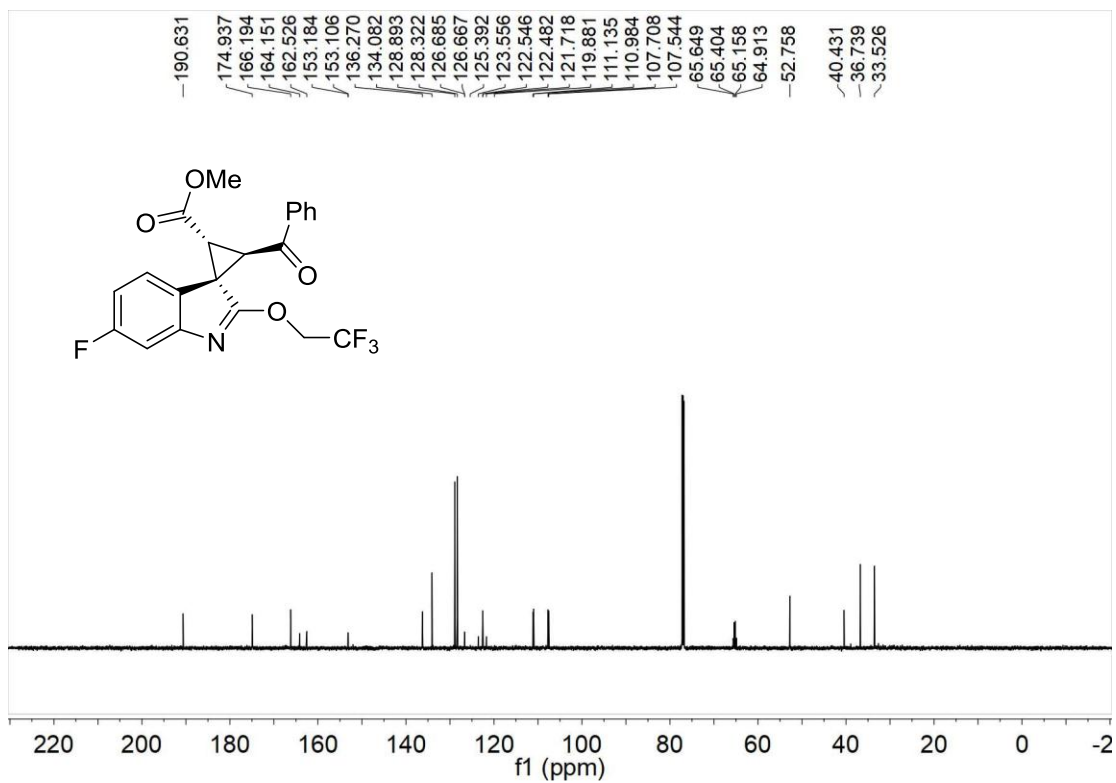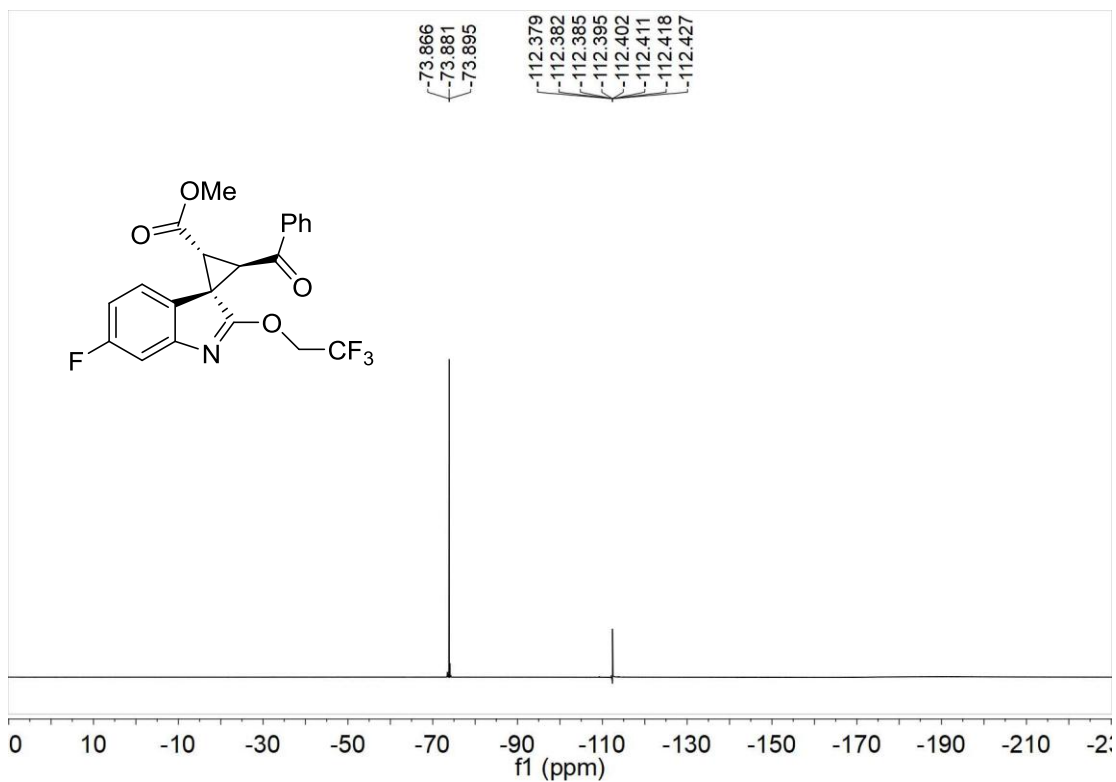

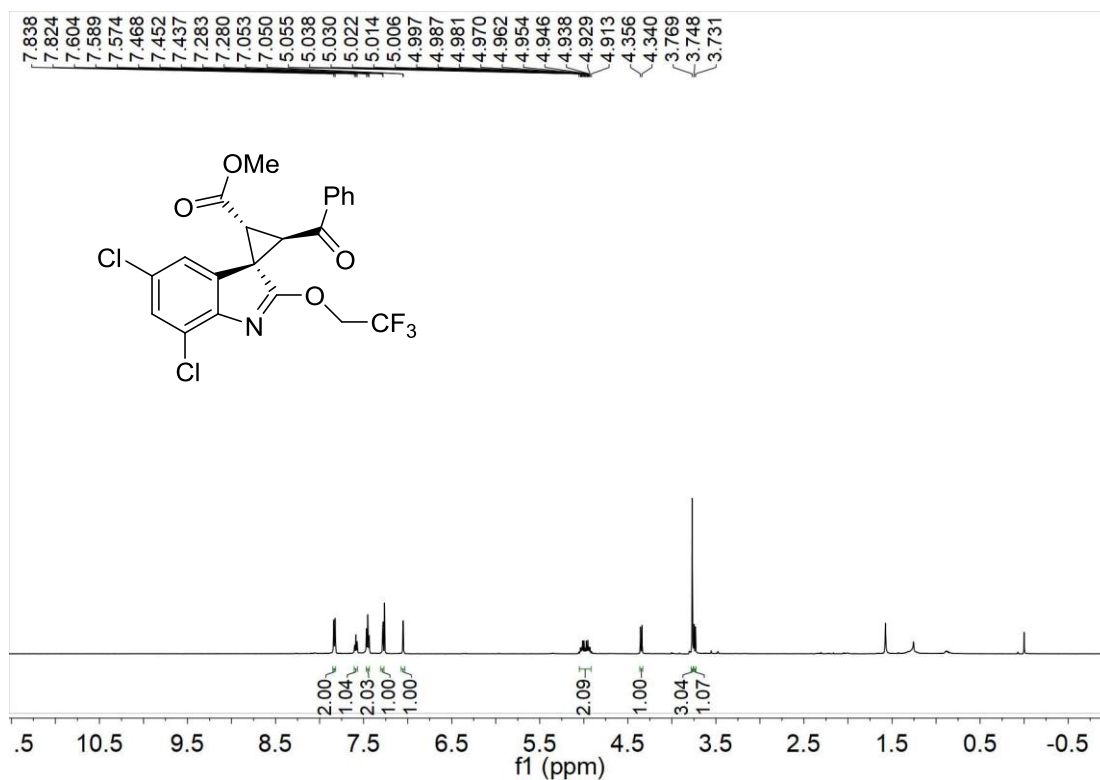

**Figure 69.**  $^1\text{H}$  NMR spectrum (500 MHz,  $\text{CDCl}_3$ ) of **4ak**

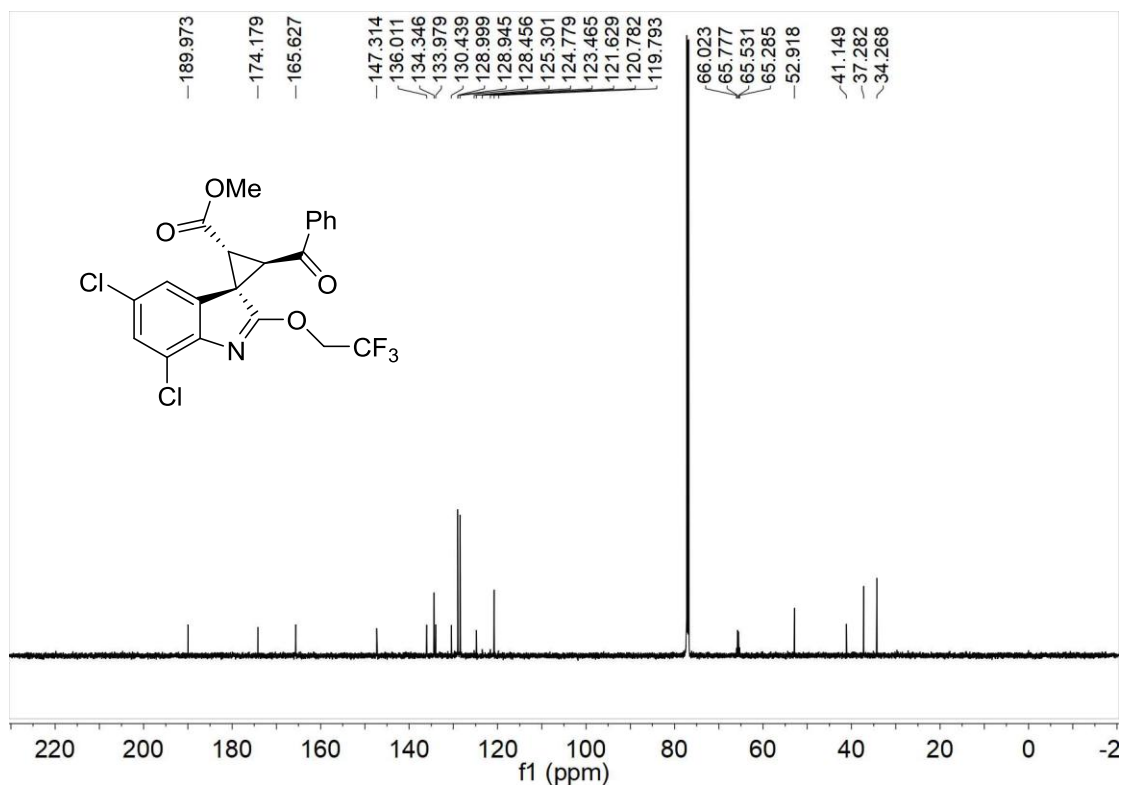

**Figure 70.**  $^{13}\text{C}$  NMR spectrum (151 MHz,  $\text{CDCl}_3$ ) of **4ak**



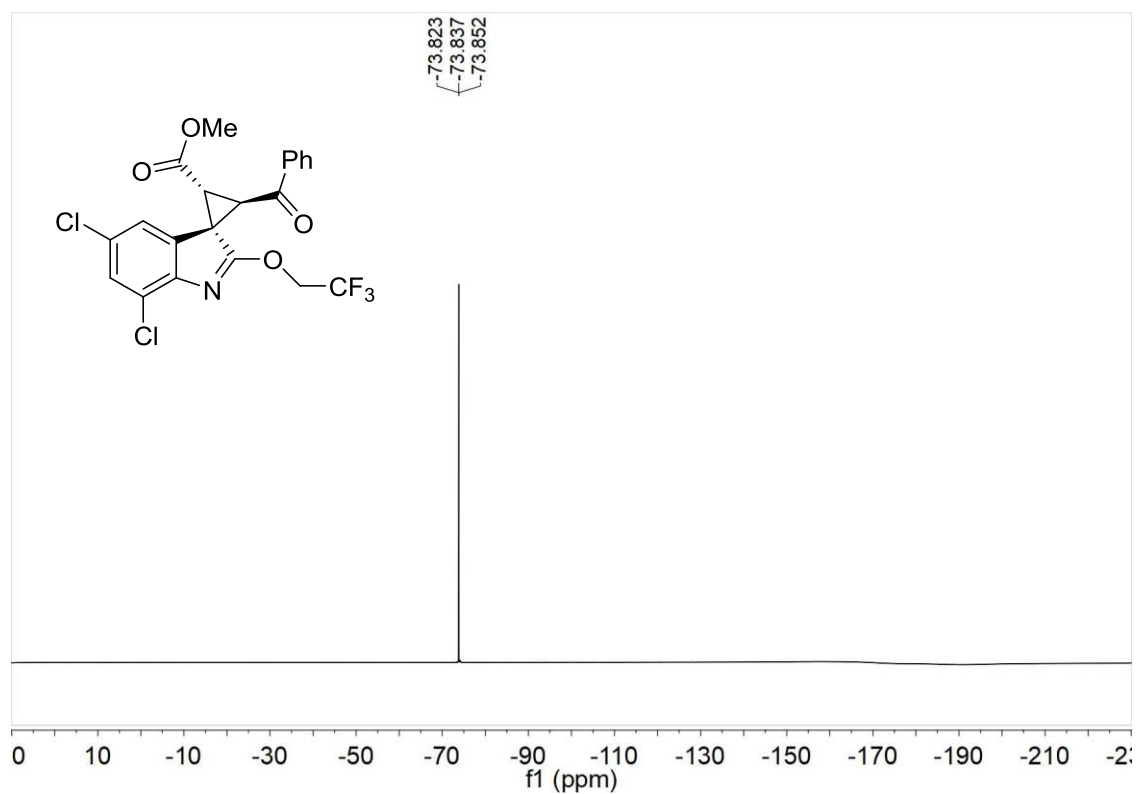

**Figure 71.**  $^{19}\text{F}$  NMR spectrum (565 MHz,  $\text{CDCl}_3$ ) of **4ak**

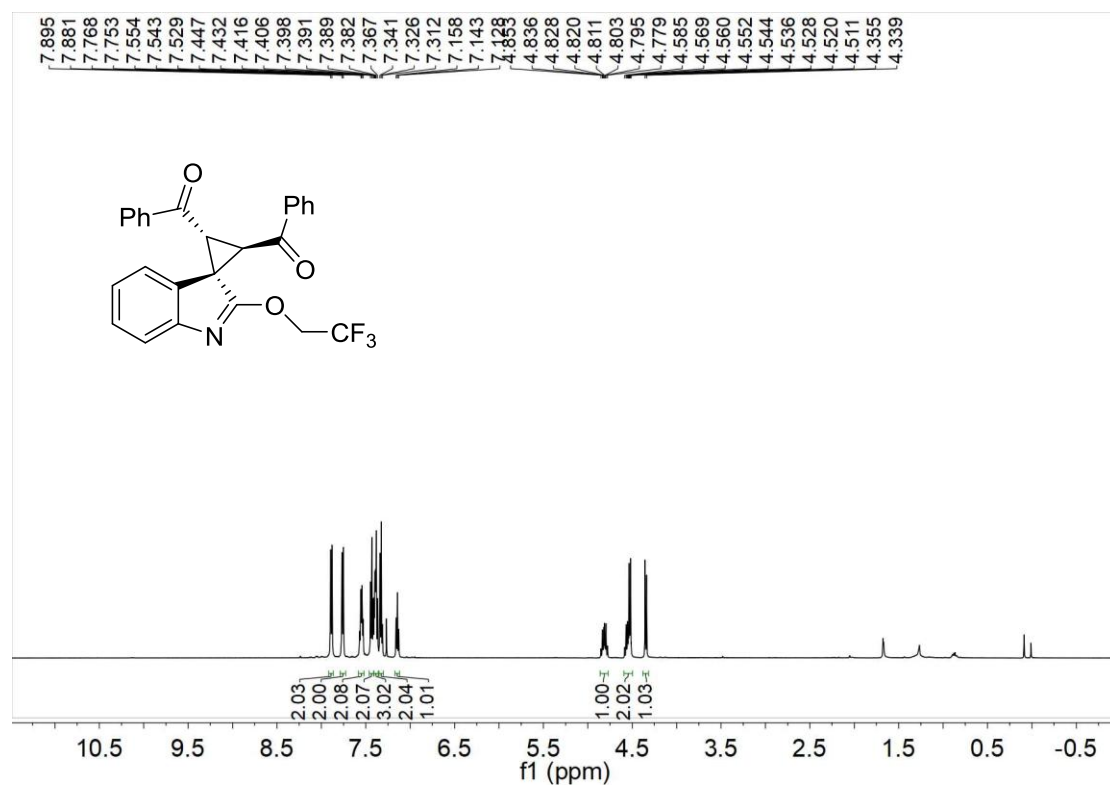

**Figure 72.**  $^1\text{H}$  NMR spectrum (500 MHz,  $\text{CDCl}_3$ ) of **4al**

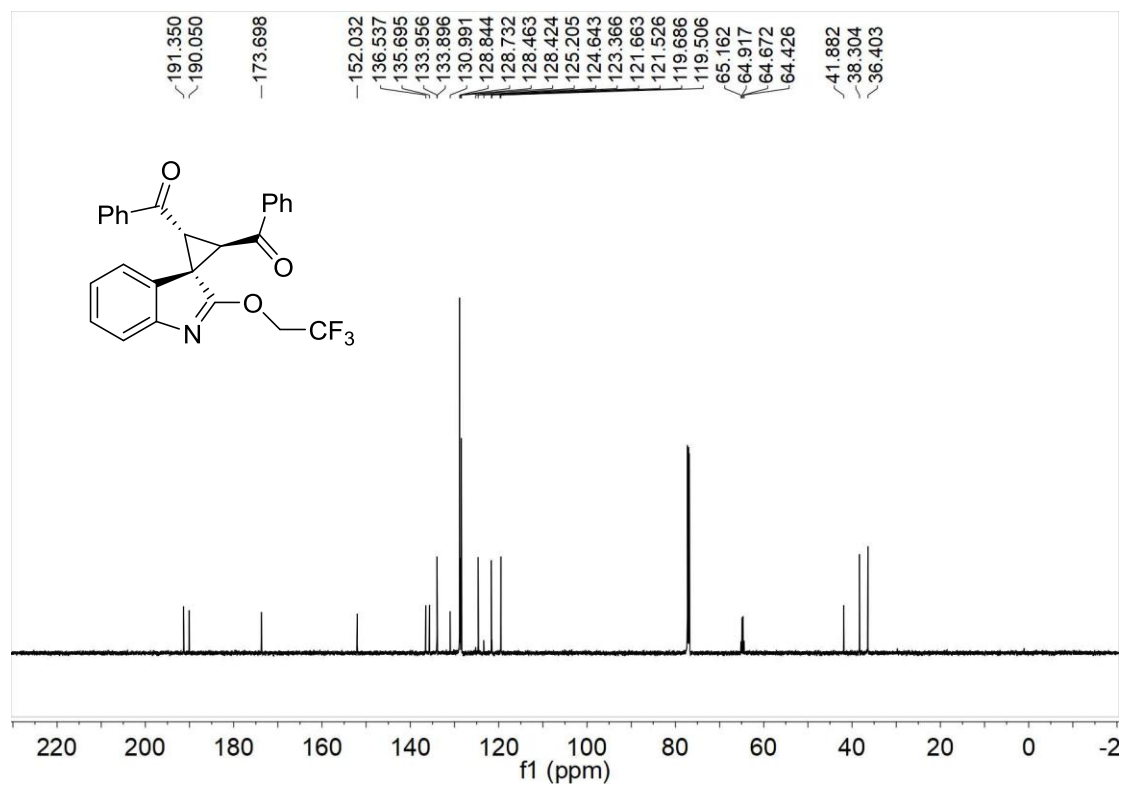

**Figure 73.** <sup>13</sup>C NMR spectrum (151 MHz, CDCl<sub>3</sub>) of **4al**

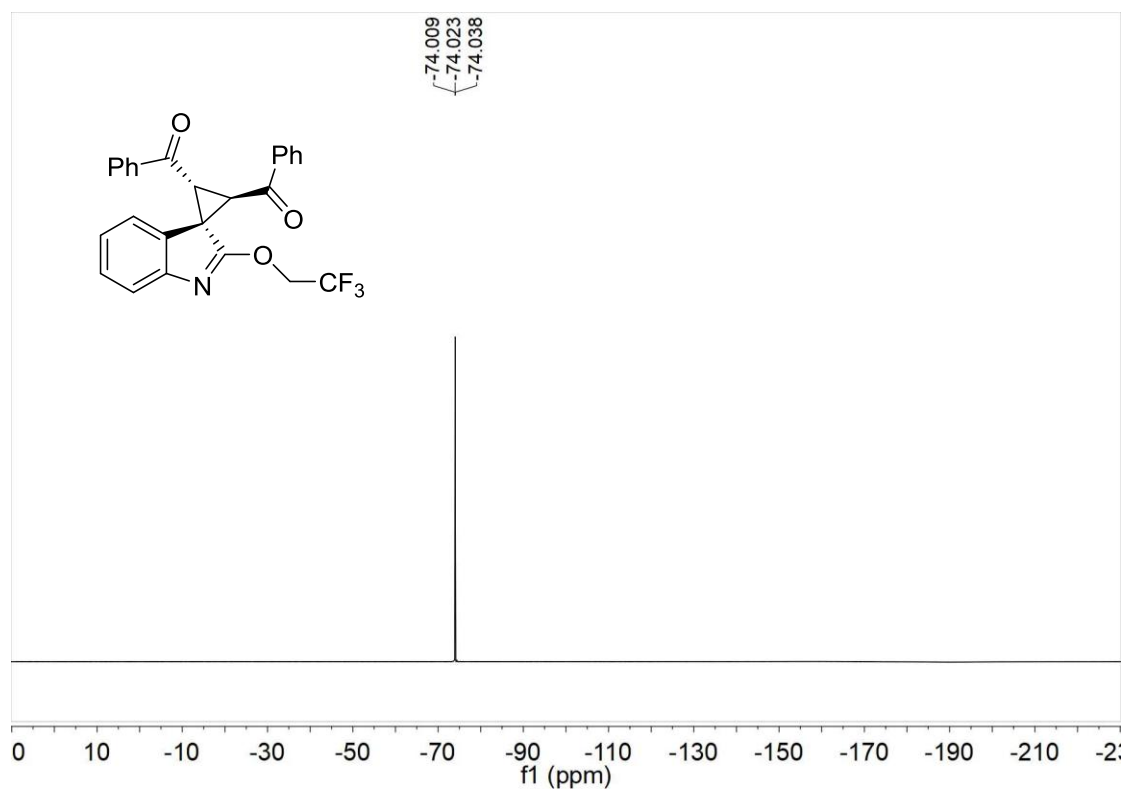

**Figure 74.** <sup>19</sup>F NMR spectrum (565 MHz, CDCl<sub>3</sub>) of **4al**

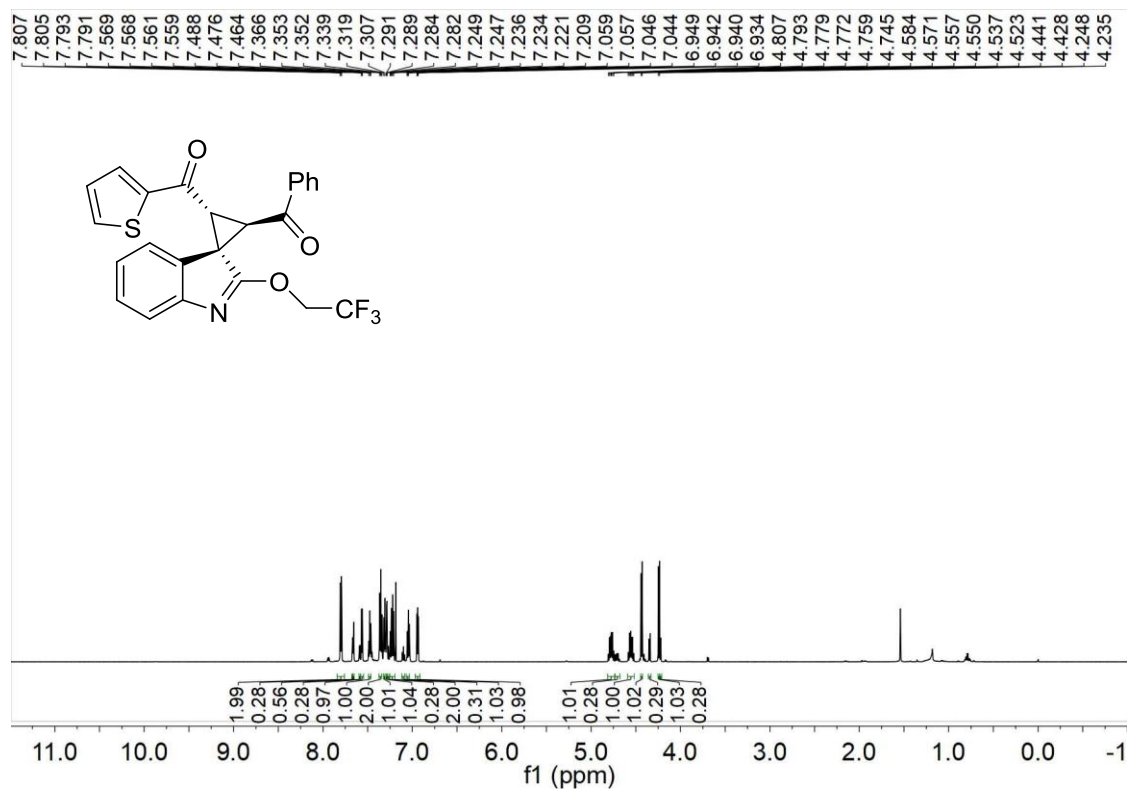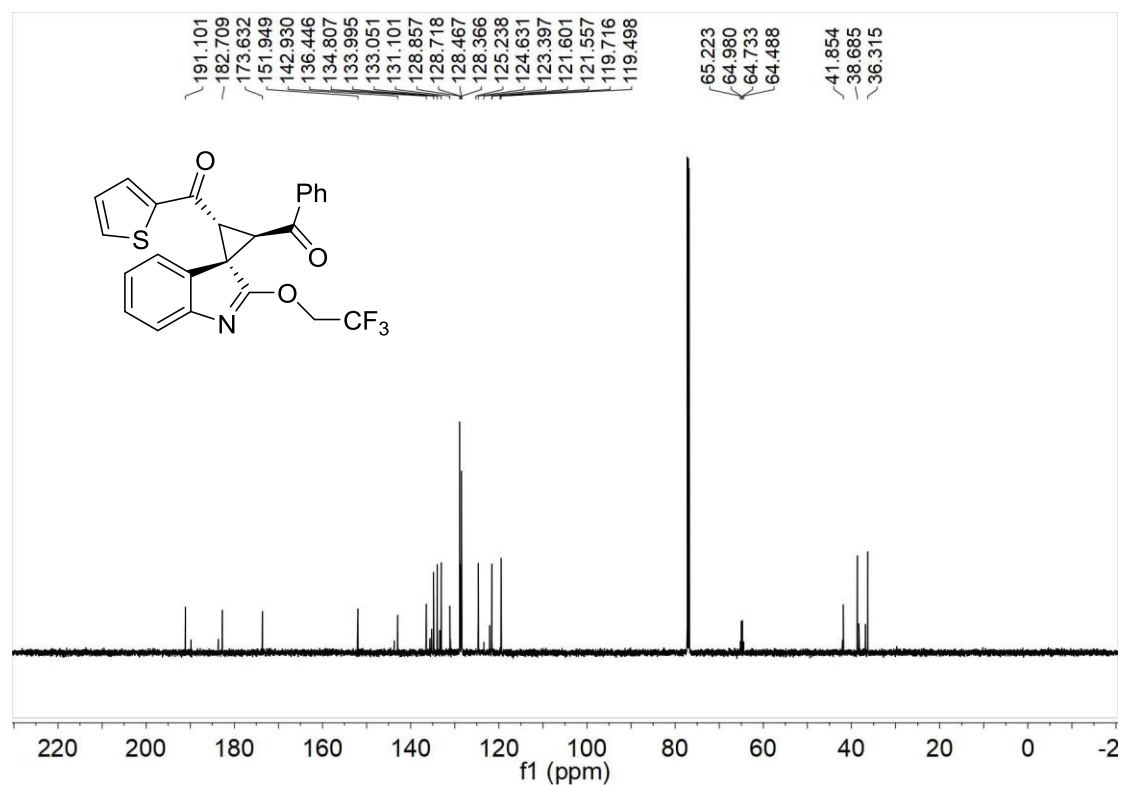

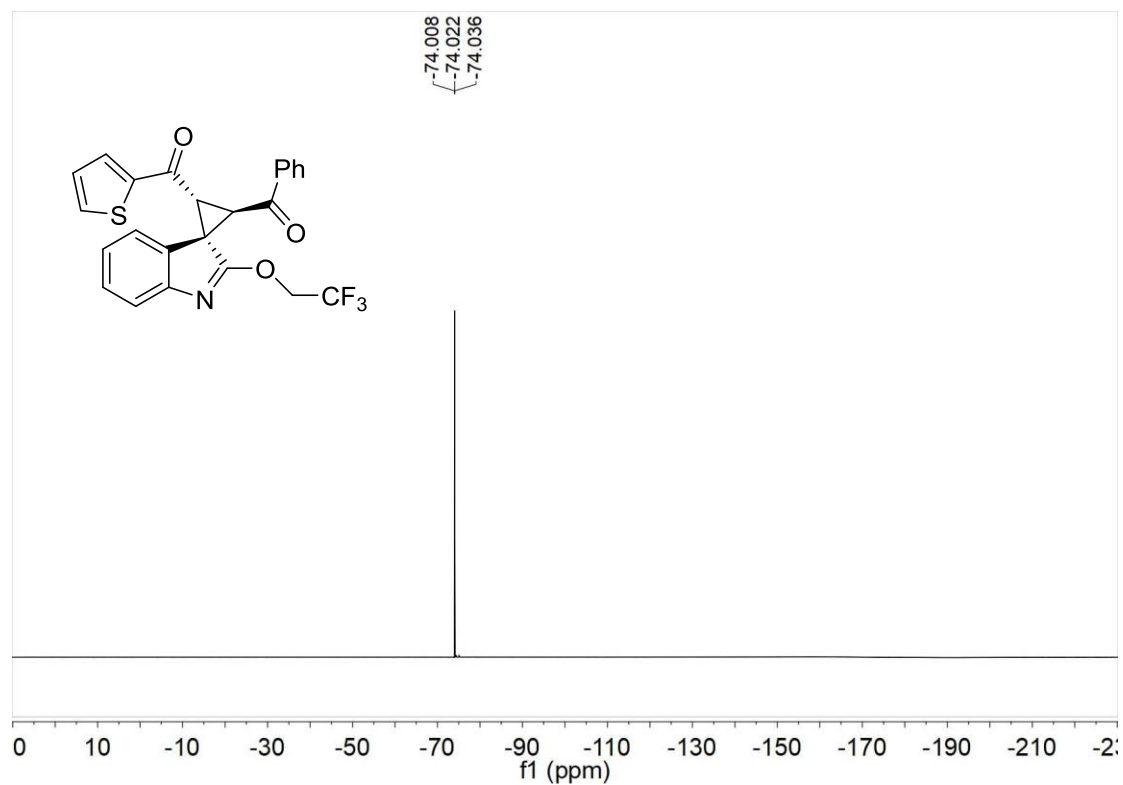

Figure 77.  $^{19}\text{F}$  NMR spectrum (565 MHz,  $\text{CDCl}_3$ ) of 4am

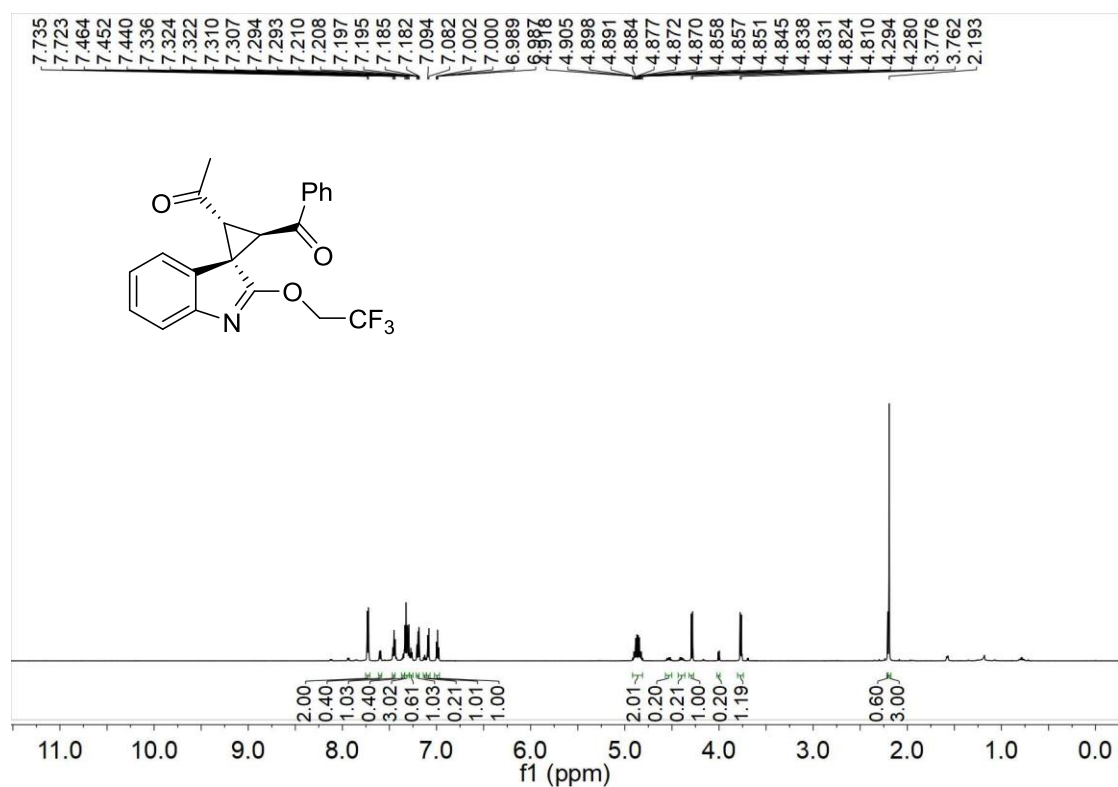

Figure 78.  $^1\text{H}$  NMR spectrum (600 MHz,  $\text{CDCl}_3$ ) of 4am

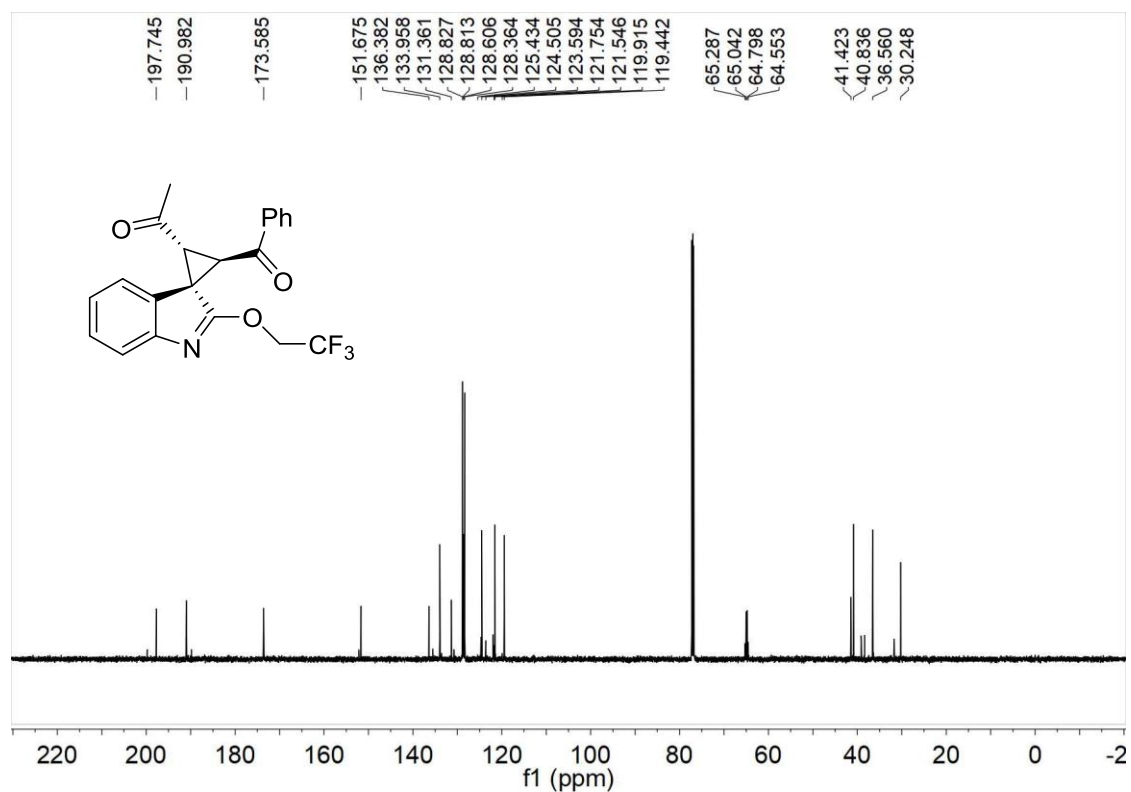

**Figure 79.** <sup>13</sup>C NMR spectrum (151 MHz, CDCl<sub>3</sub>) of **4an**

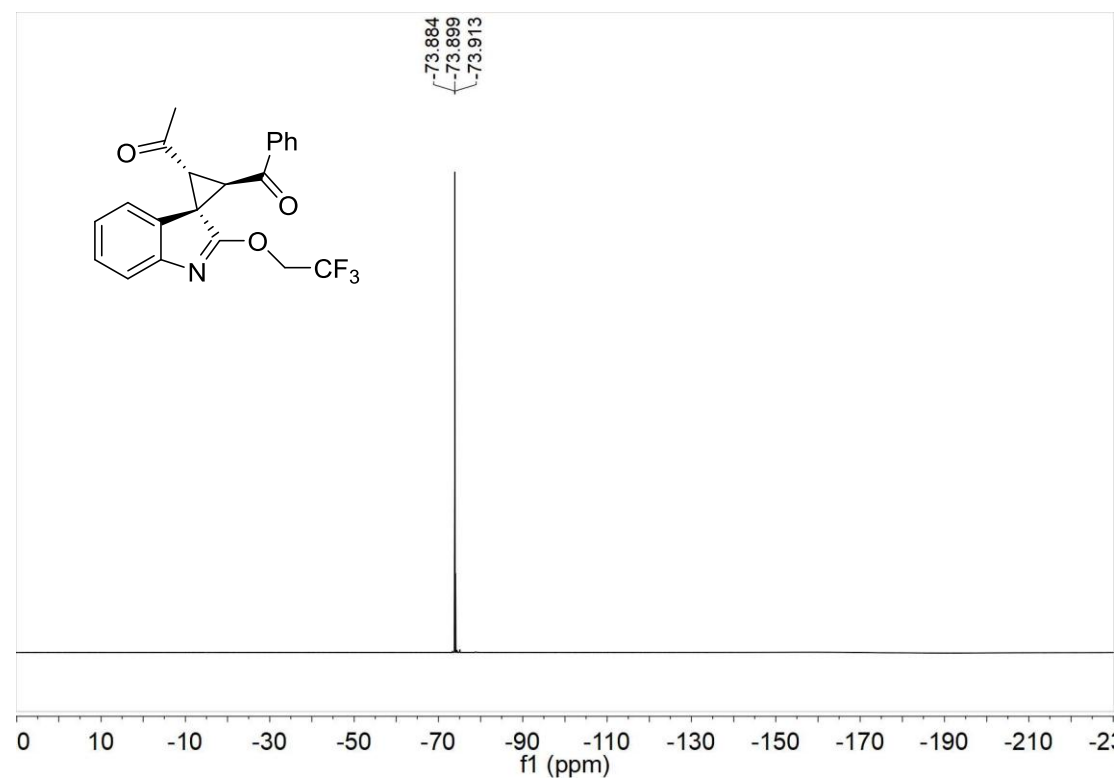

**Figure 80.** <sup>19</sup>F NMR spectrum (565 MHz, CDCl<sub>3</sub>) of **4an**

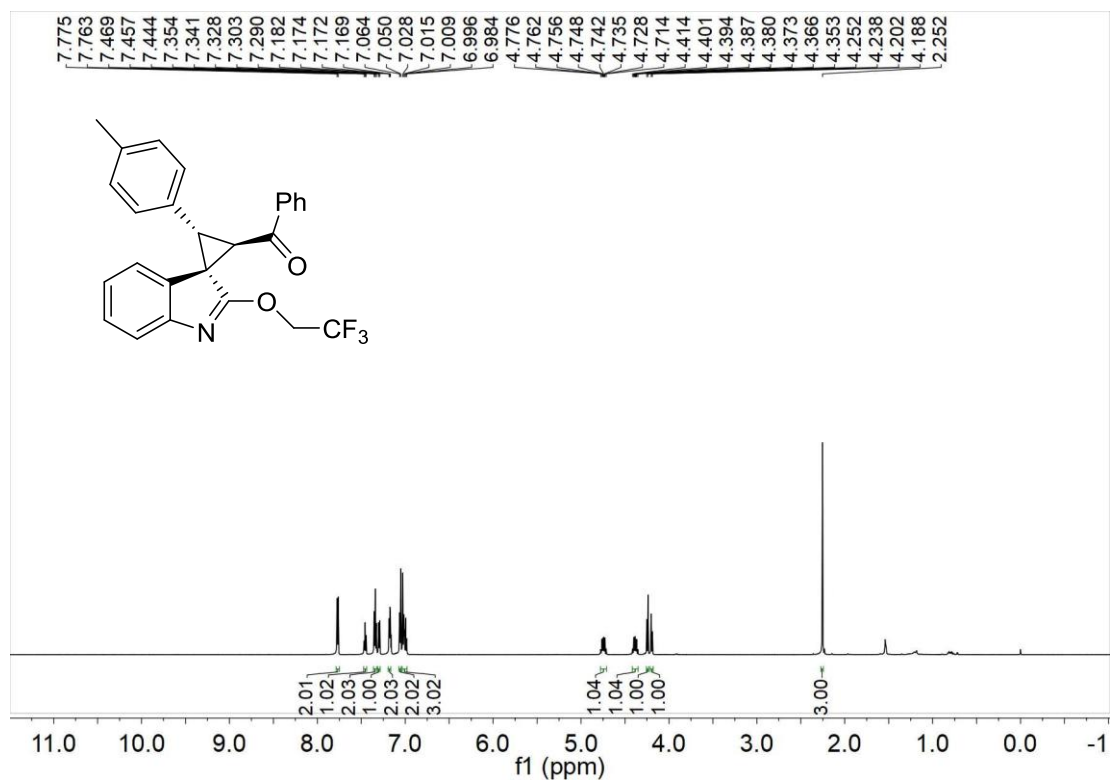

**Figure 81.** <sup>1</sup>H NMR spectrum (600 MHz, CDCl<sub>3</sub>) of **4ao**

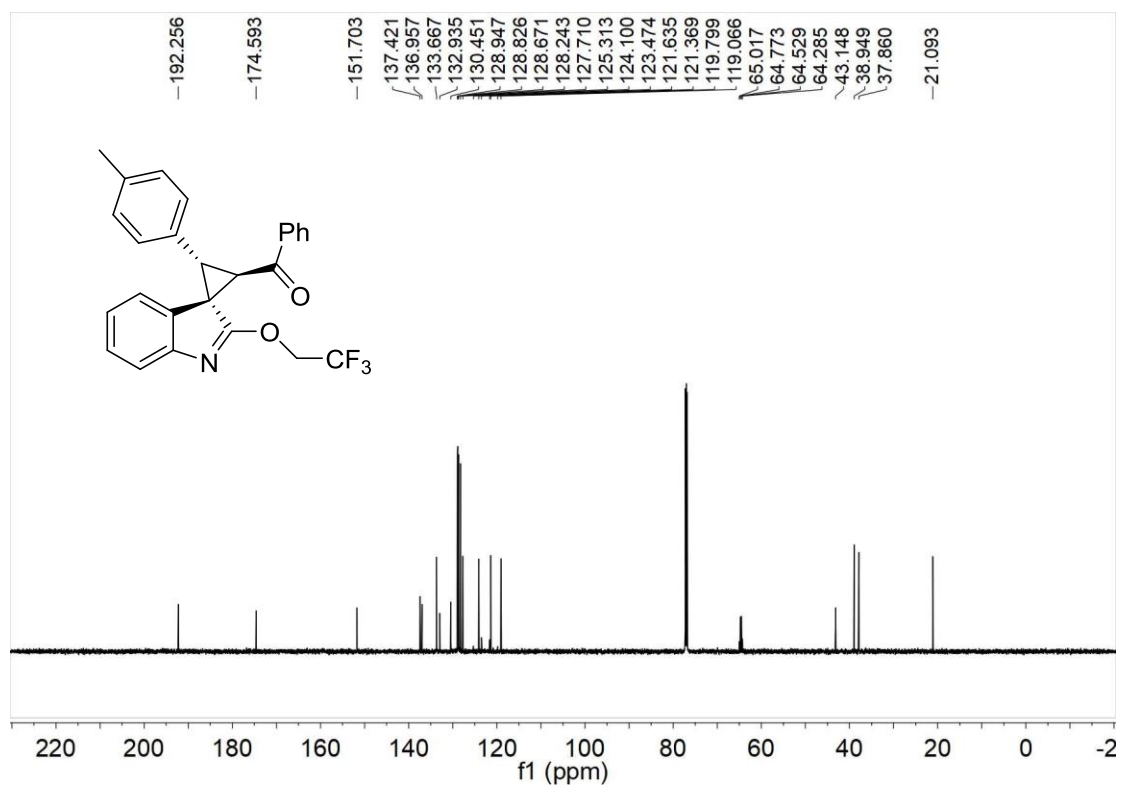

**Figure 82.** <sup>13</sup>C NMR spectrum (151 MHz, CDCl<sub>3</sub>) of **4ao**

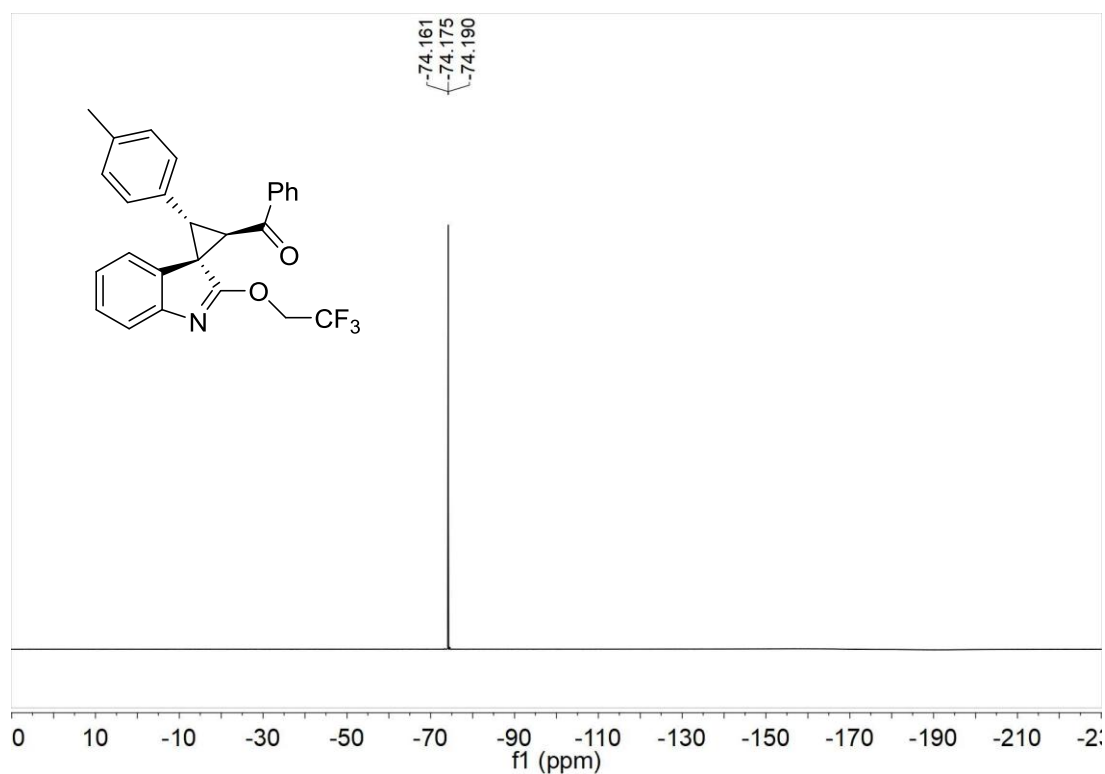

**Figure 83.**  $^{19}\text{F}$  NMR spectrum (565 MHz,  $\text{CDCl}_3$ ) of **4ao**

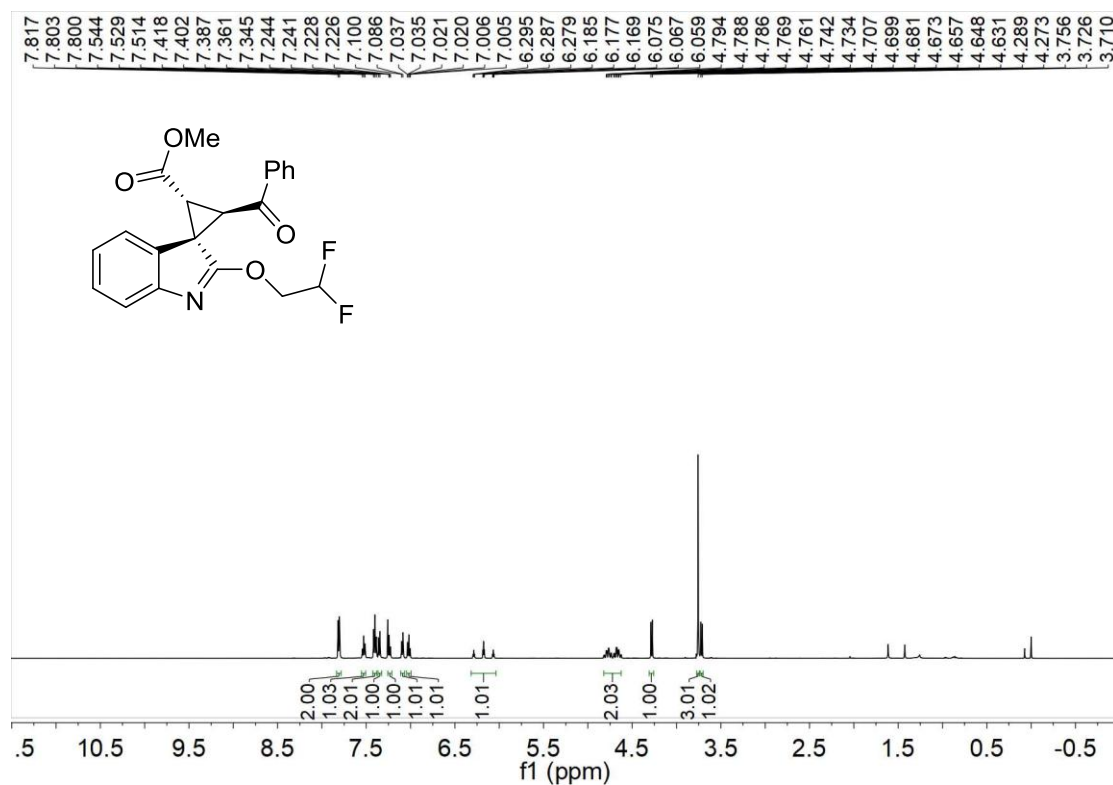

**Figure 84.**  $^1\text{H}$  NMR spectrum (500 MHz,  $\text{CDCl}_3$ ) of **4ap**

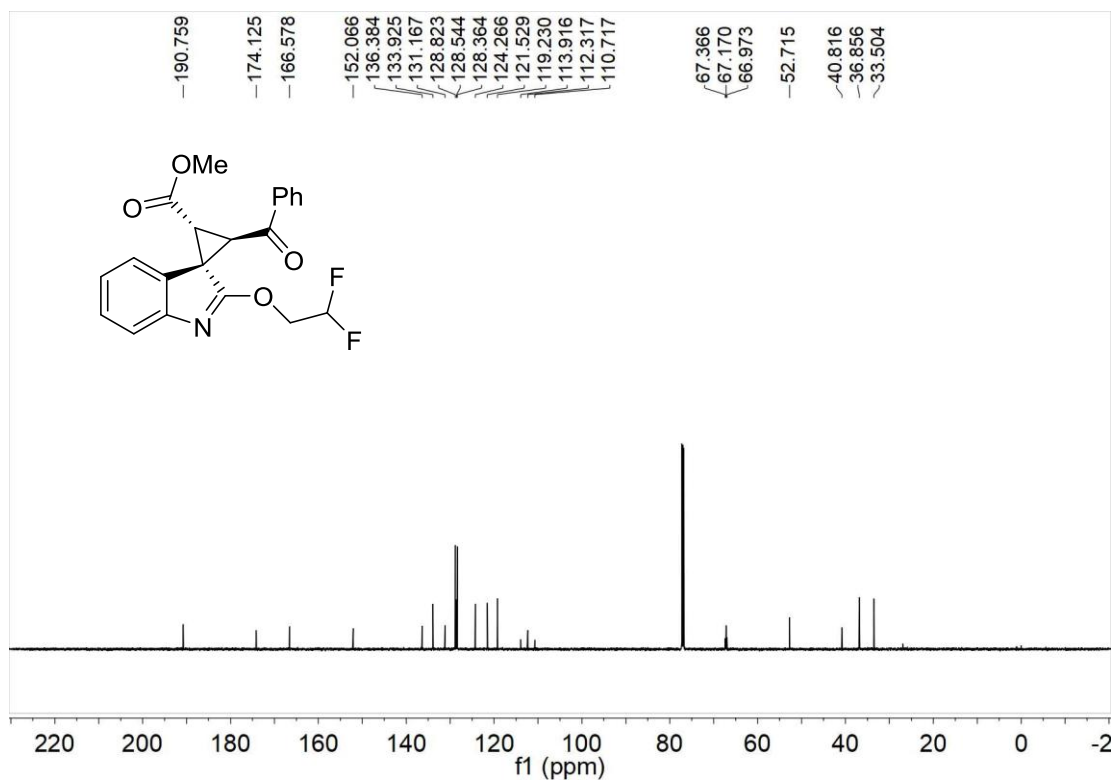

**Figure 85.** <sup>13</sup>C NMR spectrum (151 MHz, CDCl<sub>3</sub>) of **4ap**

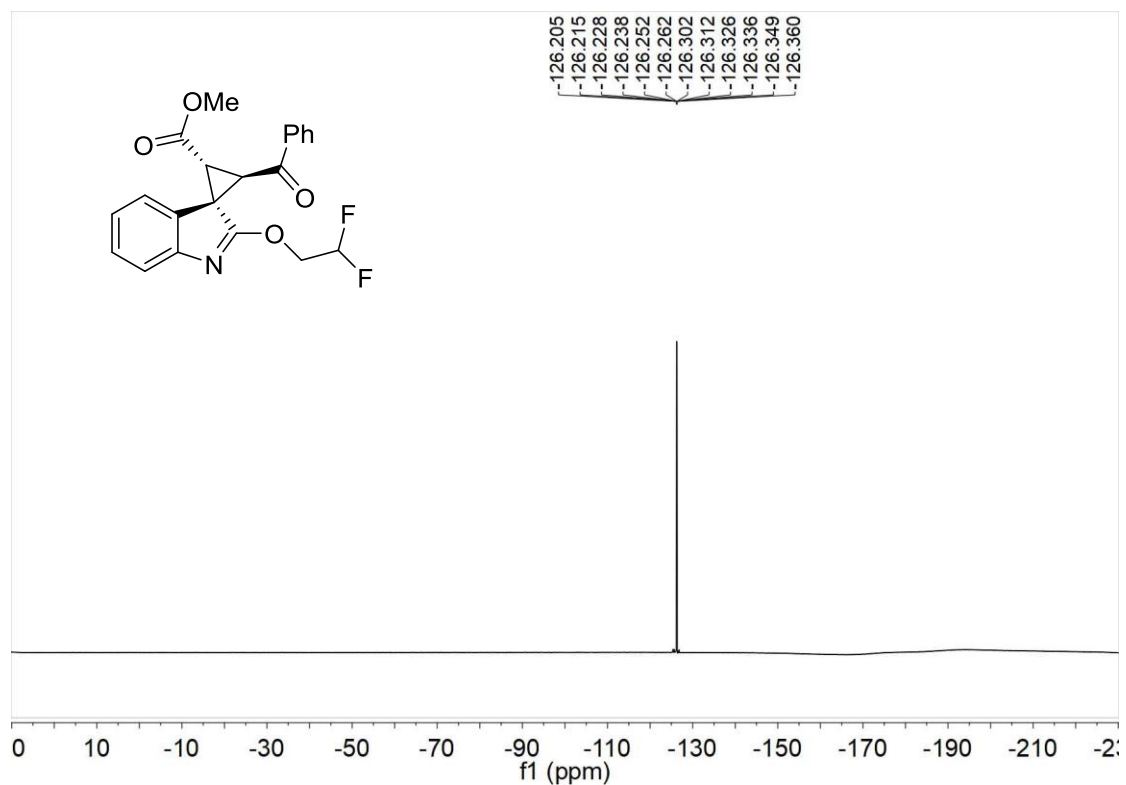

**Figure 86.** <sup>19</sup>F NMR spectrum (565 MHz, CDCl<sub>3</sub>) of **4ap**



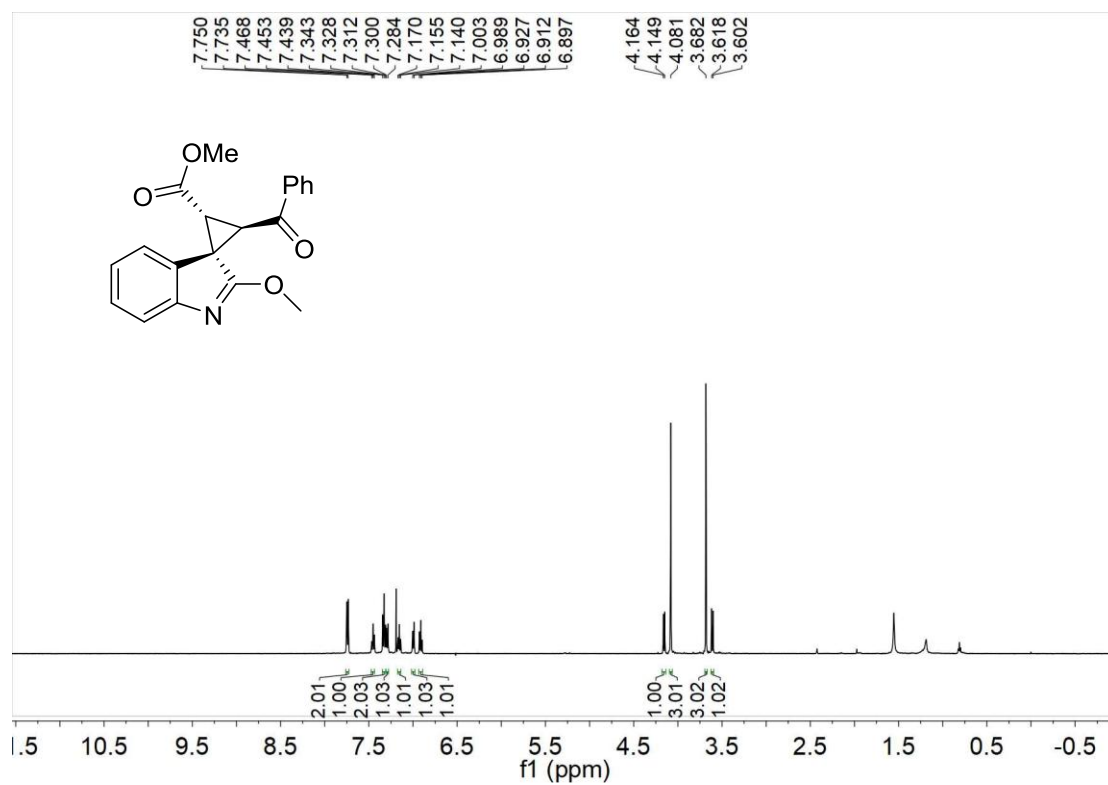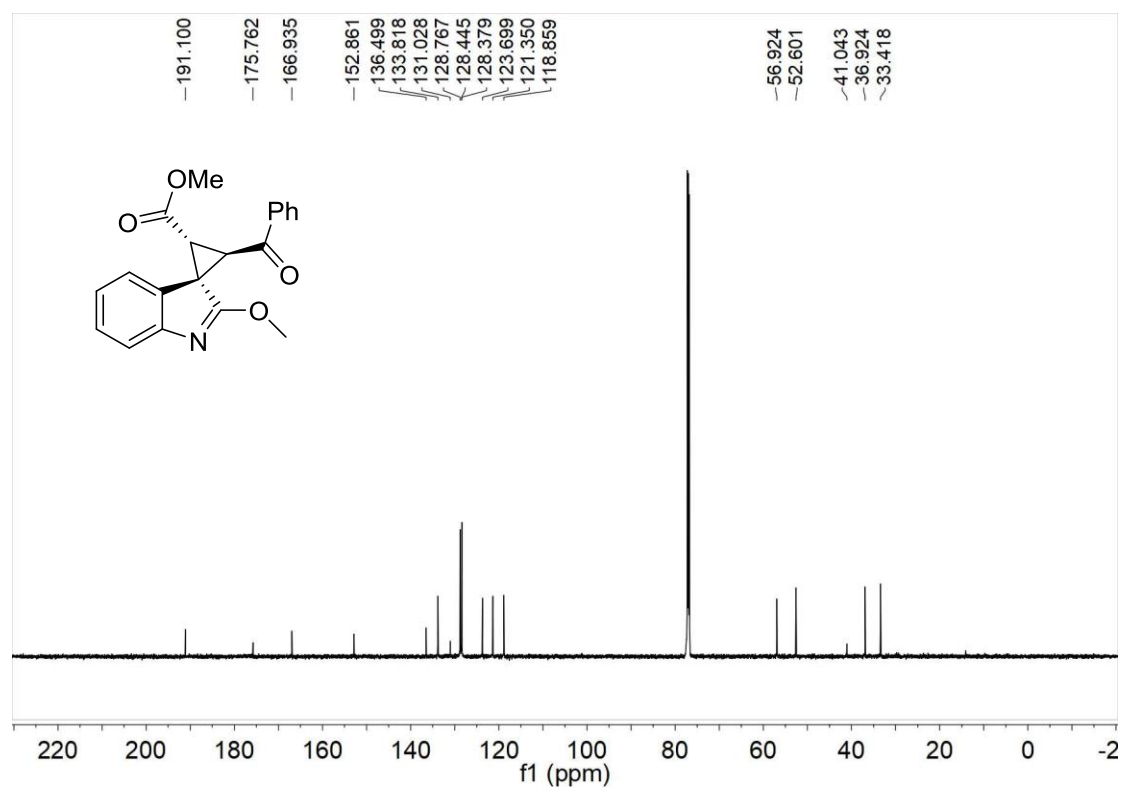

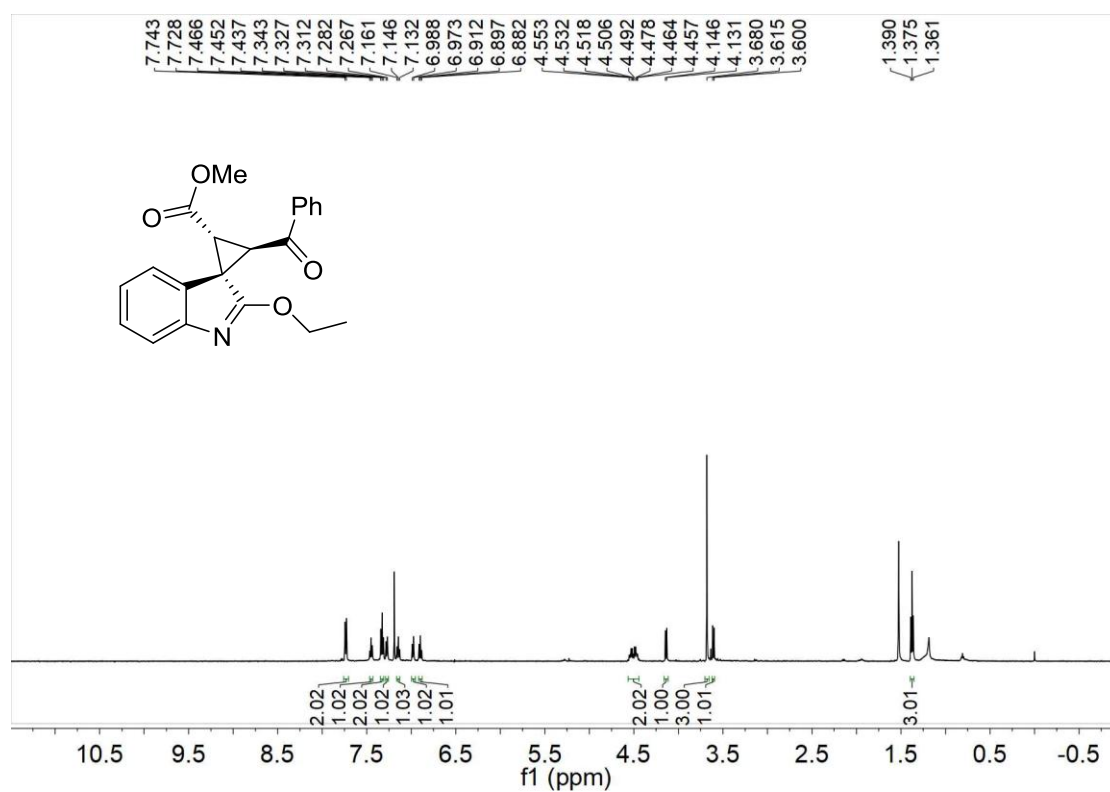

**Figure 89.** <sup>1</sup>H NMR spectrum (500 MHz, CDCl<sub>3</sub>) of **4ar**

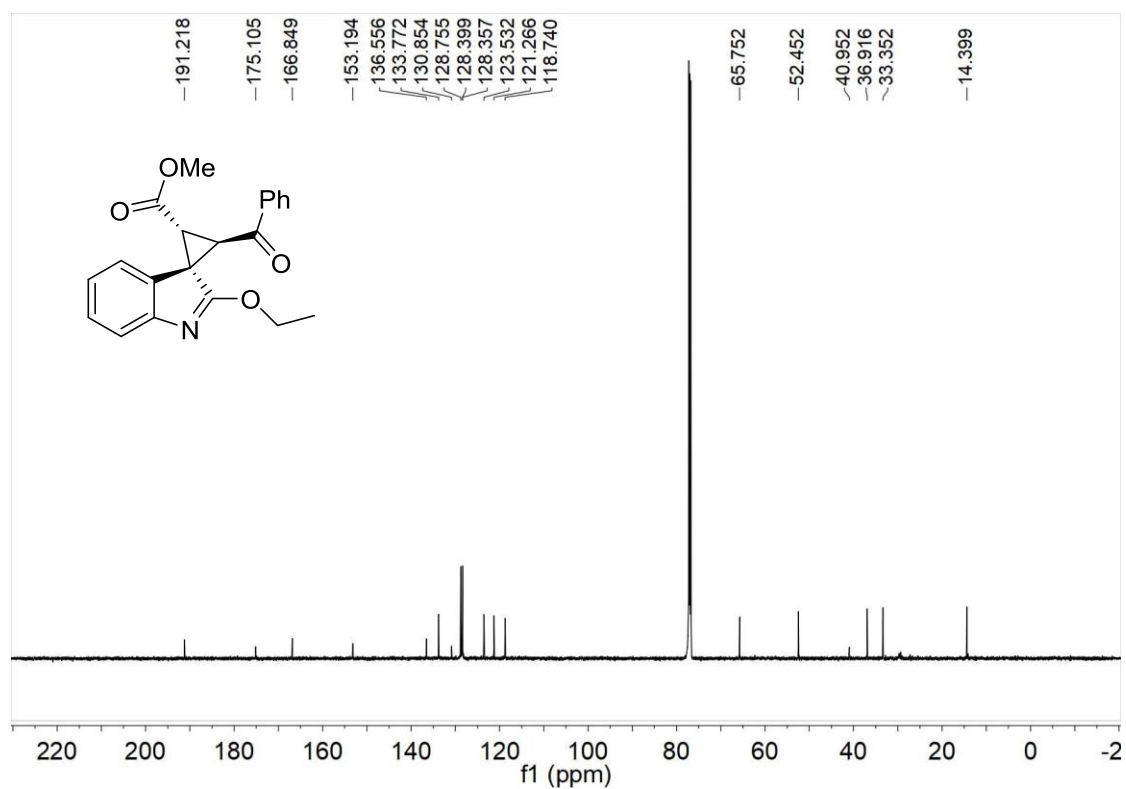

**Figure 90.** <sup>13</sup>C NMR spectrum (151 MHz, CDCl<sub>3</sub>) of **4ar**

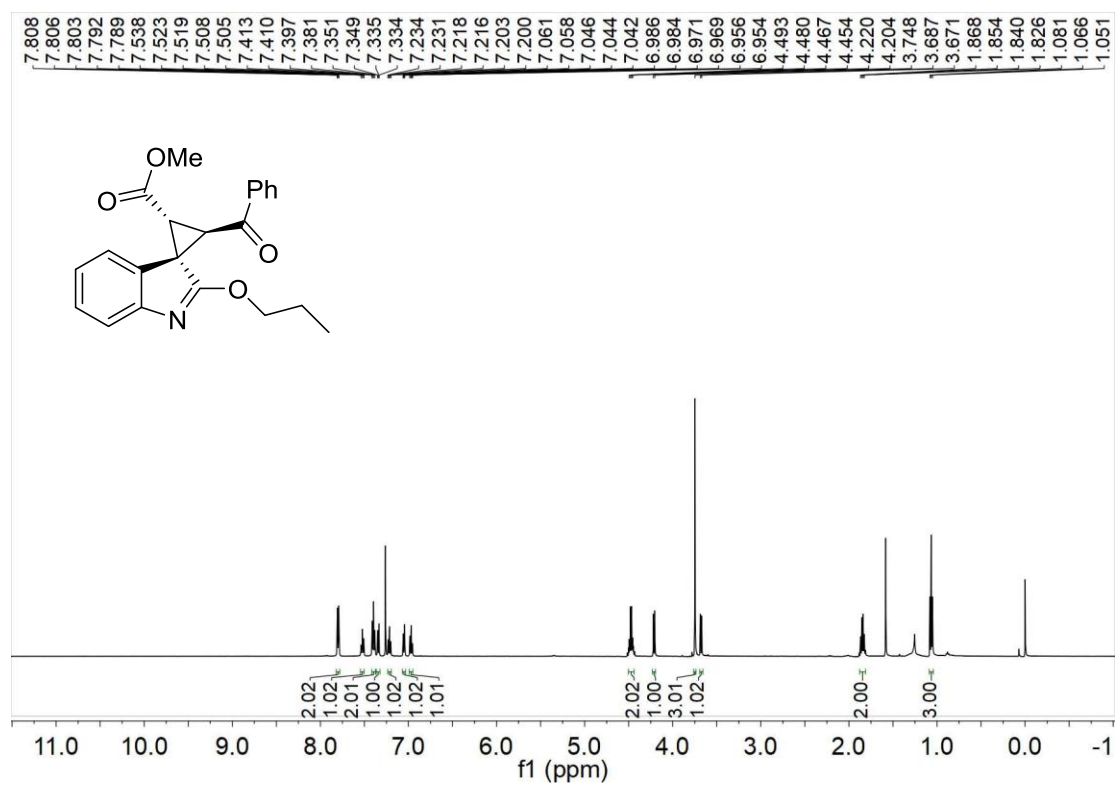

**Figure 91.** <sup>1</sup>H NMR spectrum (500 MHz, CDCl<sub>3</sub>) of **4as**

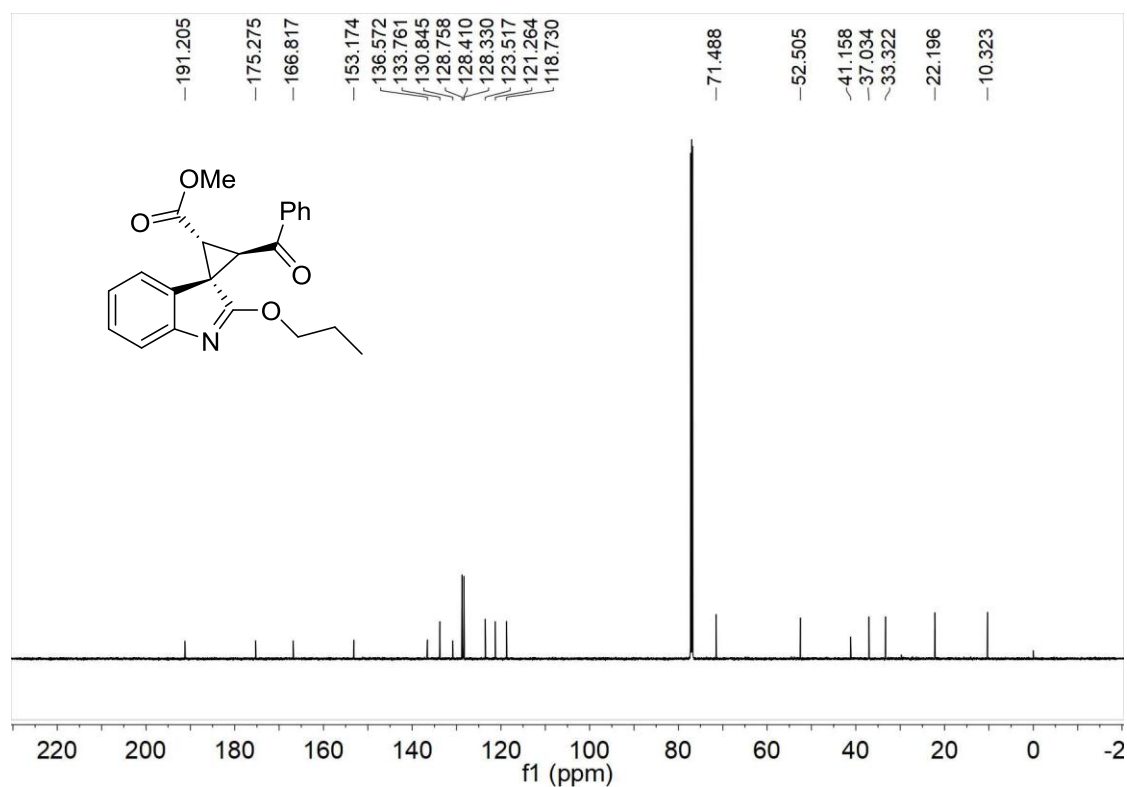

**Figure 92.** <sup>13</sup>C NMR spectrum (151 MHz, CDCl<sub>3</sub>) of **4as**

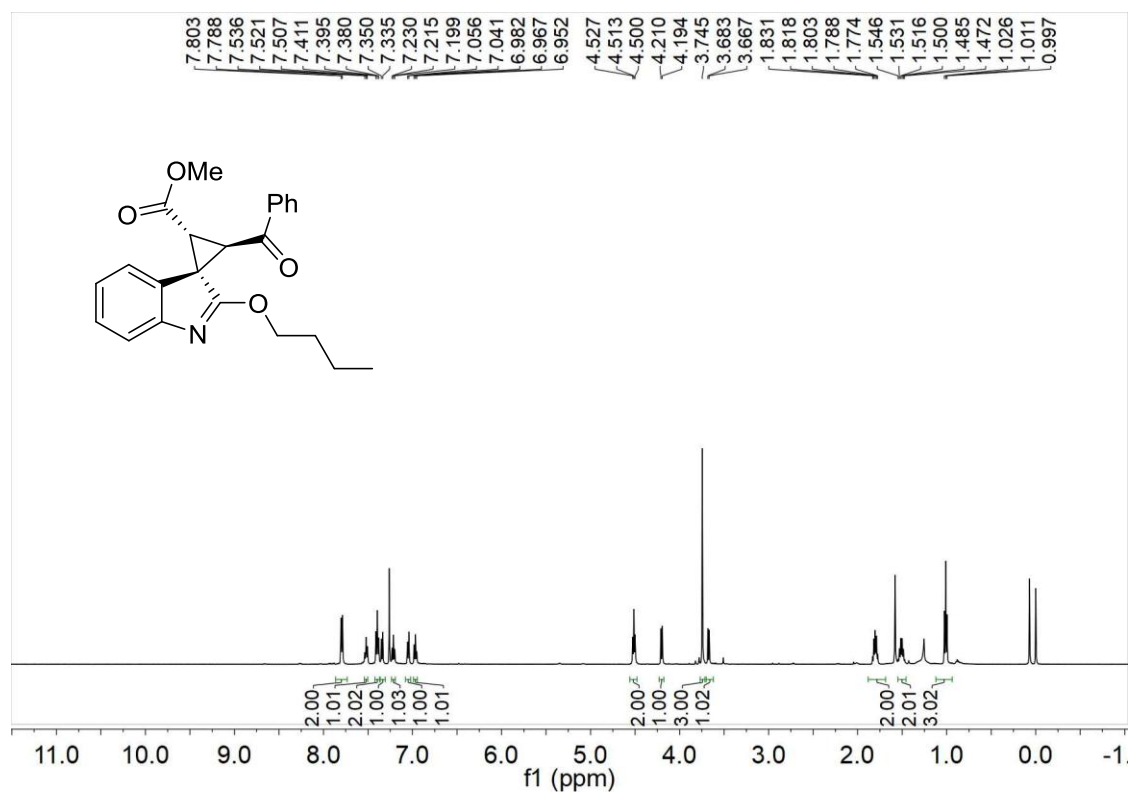

**Figure 93.**  $^1\text{H}$  NMR spectrum (500 MHz,  $\text{CDCl}_3$ ) of **4at**

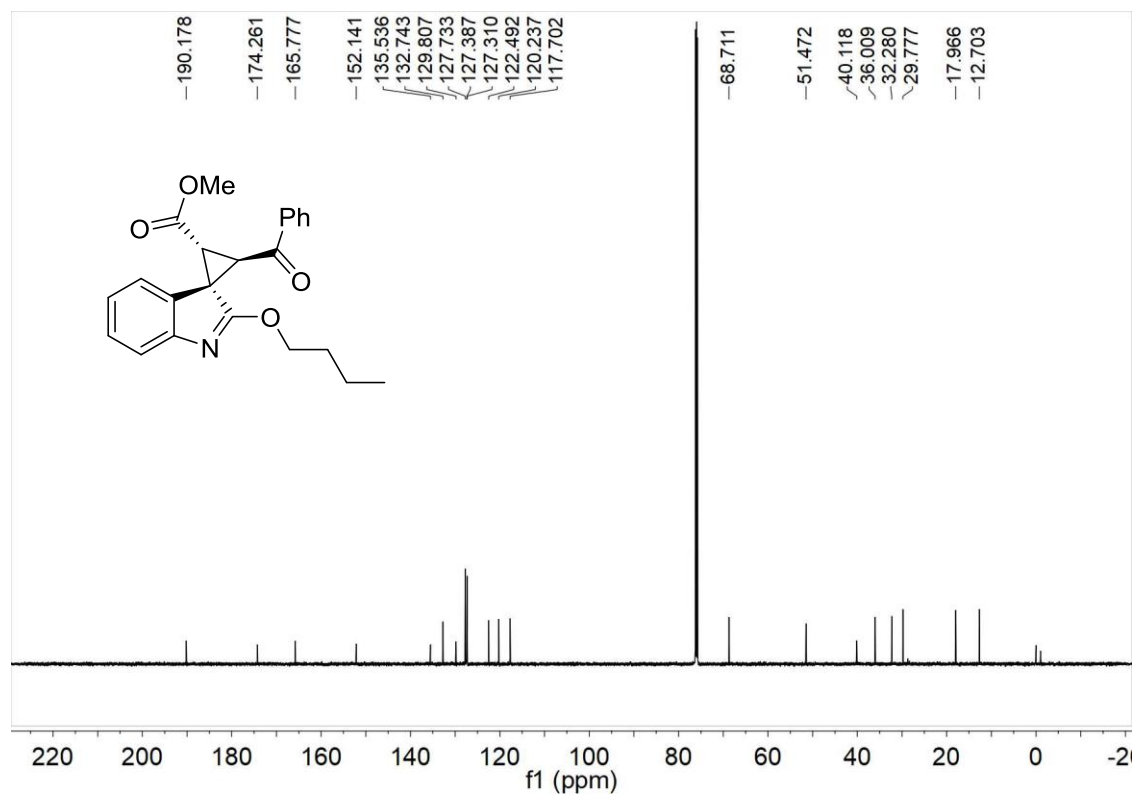

**Figure 94.**  $^{13}\text{C}$  NMR spectrum (151 MHz,  $\text{CDCl}_3$ ) of **4at**

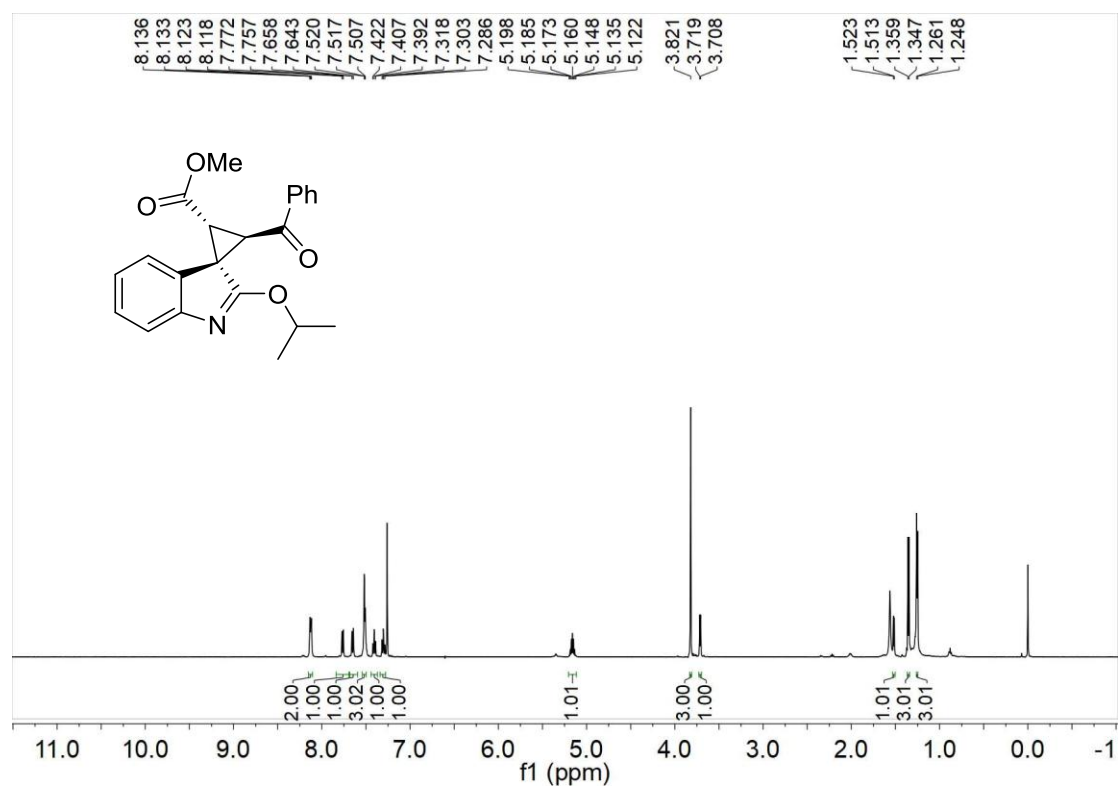

**Figure 95.**  $^1\text{H}$  NMR spectrum (500 MHz,  $\text{CDCl}_3$ ) of **4au**

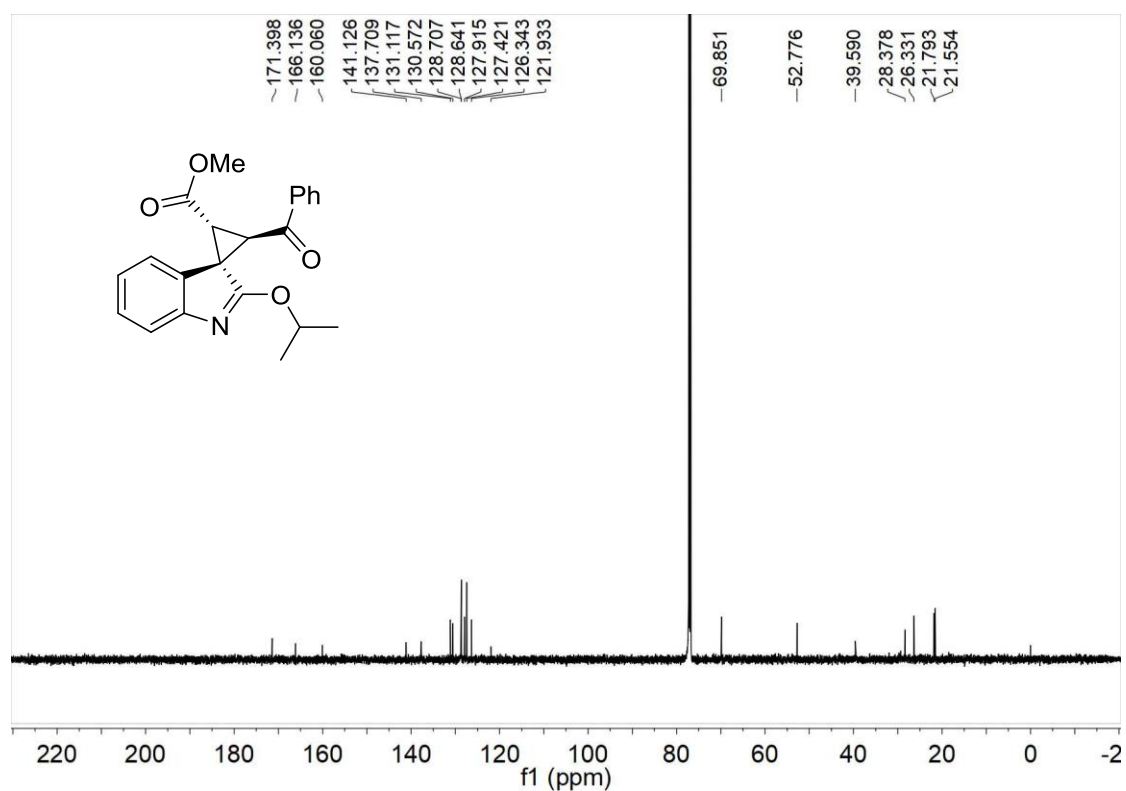

**Figure 96.**  $^{13}\text{C}$  NMR spectrum (151 MHz,  $\text{CDCl}_3$ ) of **4au**

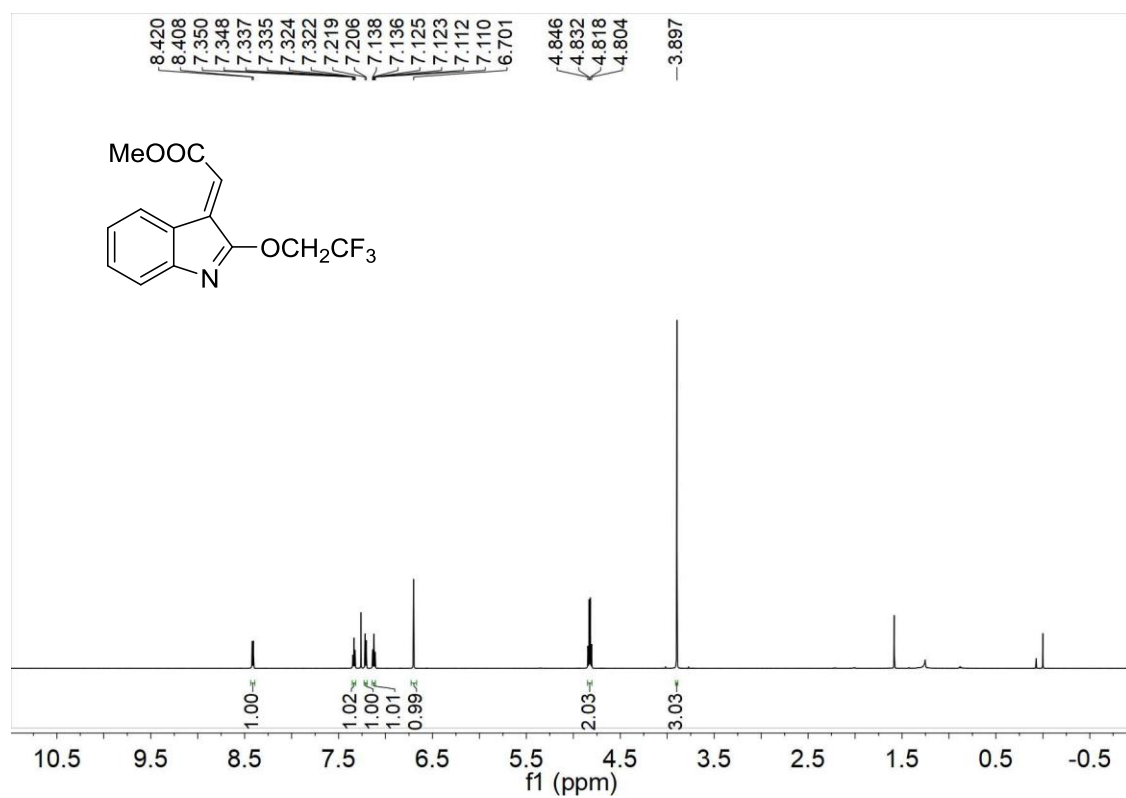

Figure 97. <sup>1</sup>H NMR spectrum (600 MHz, CDCl<sub>3</sub>) of 5a

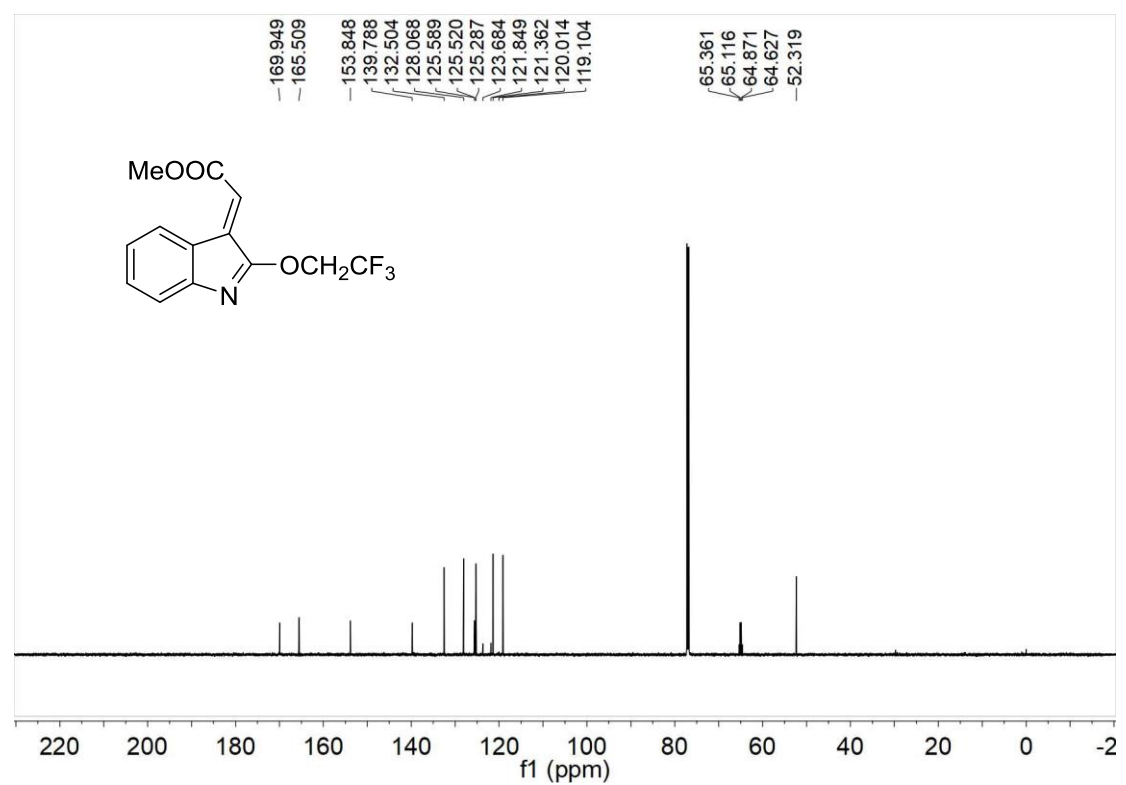

Figure 98. <sup>13</sup>C NMR spectrum (151 MHz, CDCl<sub>3</sub>) of 5a

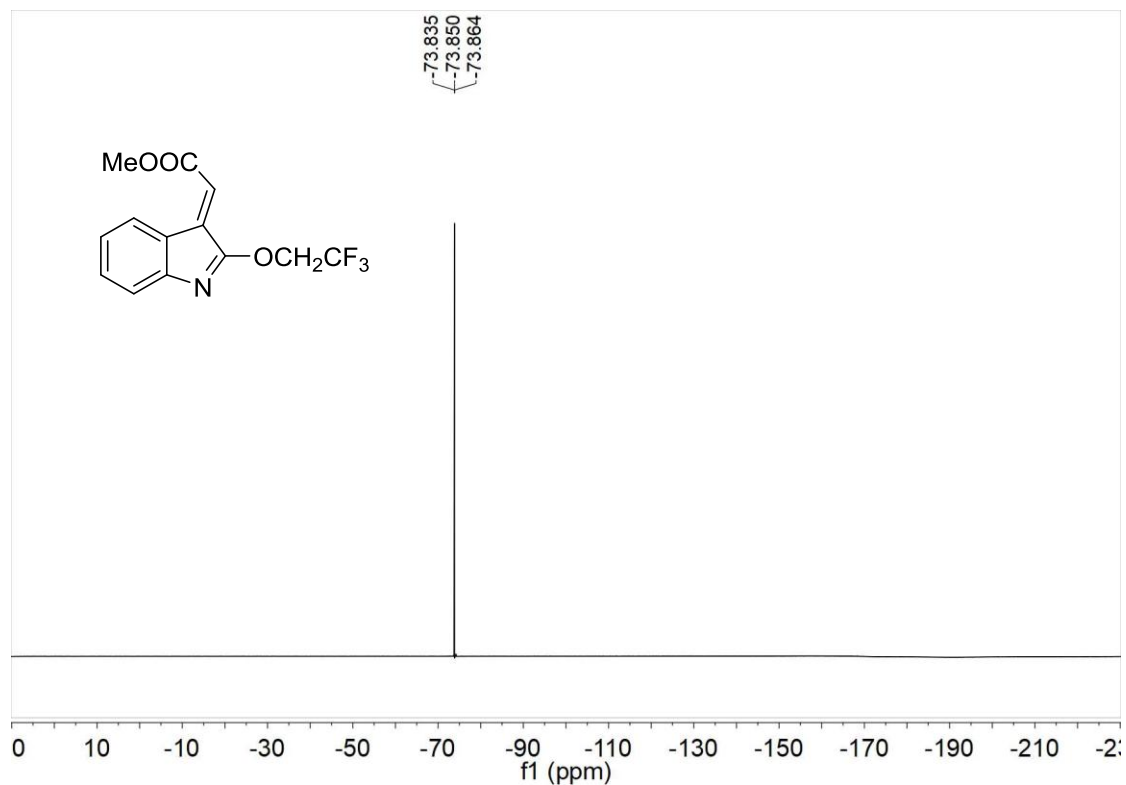

**Figure 99.**  $^{19}\text{F}$  NMR spectrum (565 MHz,  $\text{CDCl}_3$ ) of **5a**

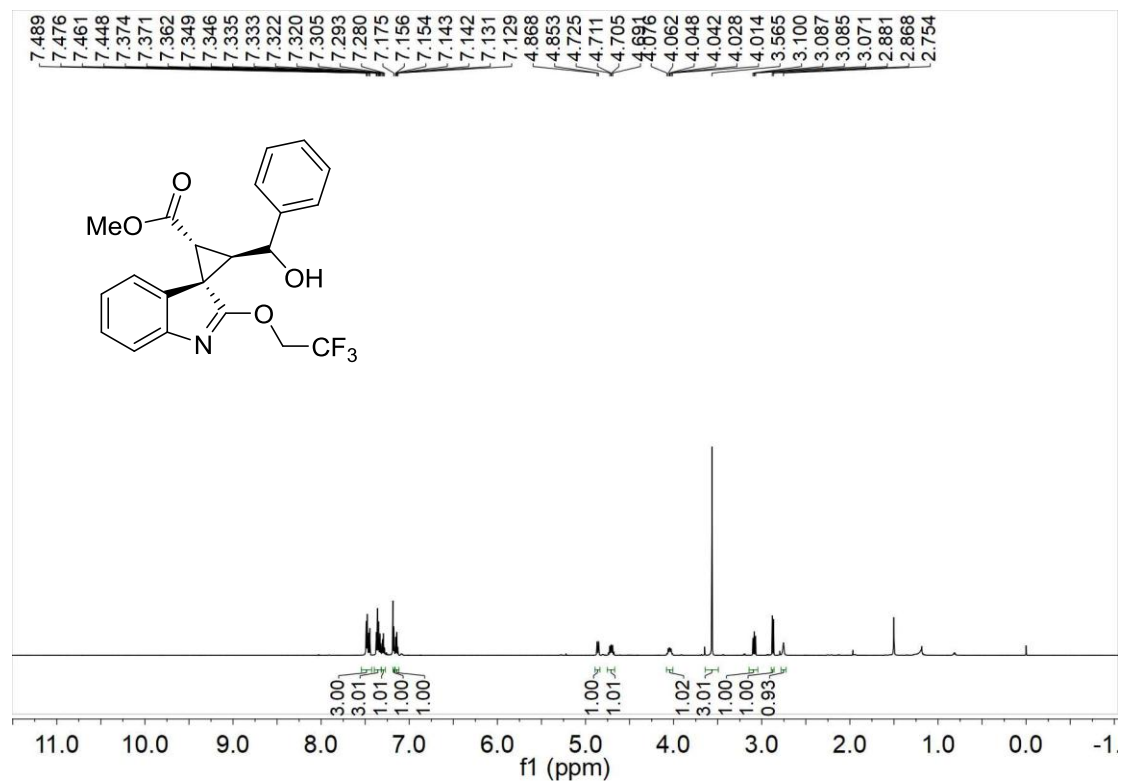

**Figure 100.**  $^1\text{H}$  NMR spectrum (600 MHz,  $\text{CDCl}_3$ ) of **6a**

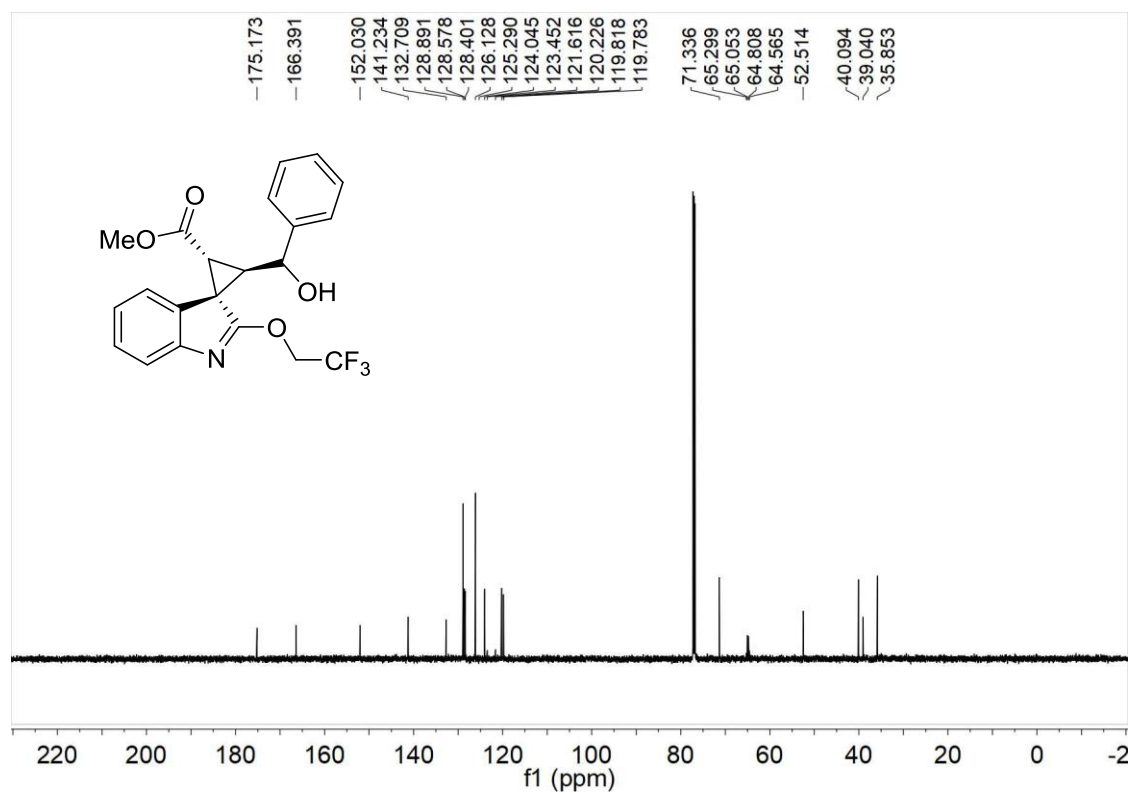

**Figure 101.**  $^{13}\text{C}$  NMR spectrum (151 MHz,  $\text{CDCl}_3$ ) of **6a**

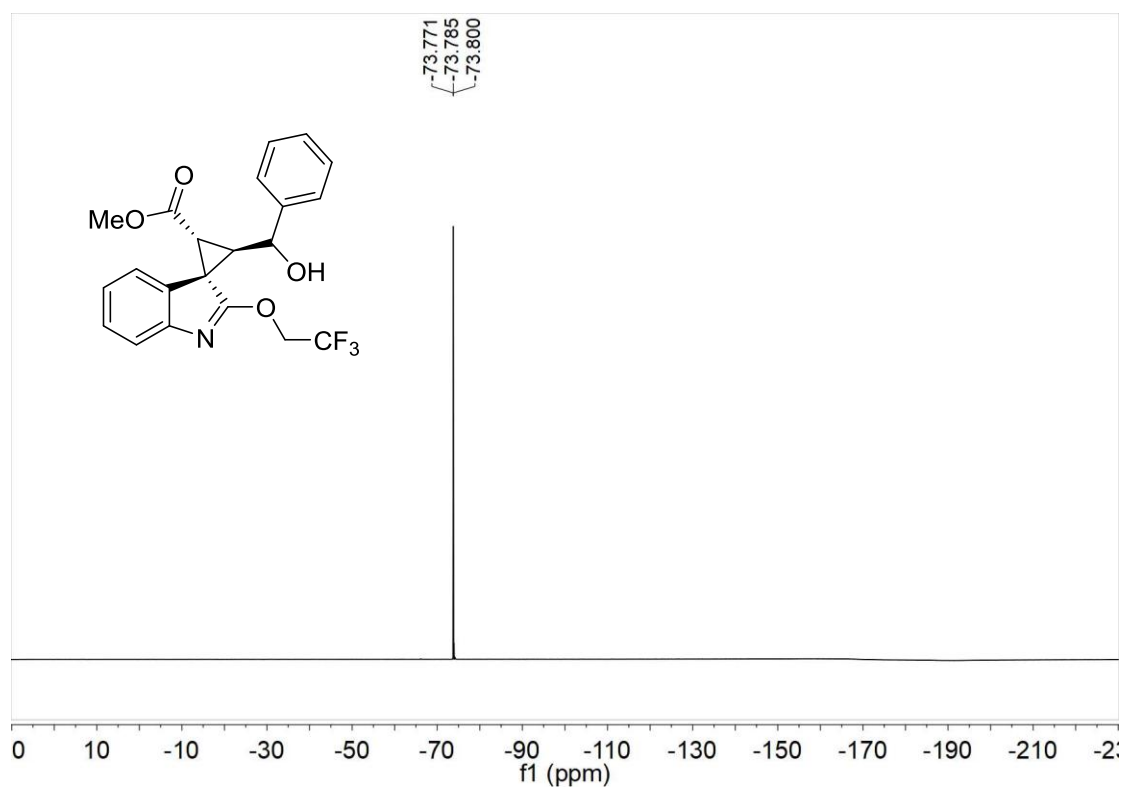

**Figure 102.**  $^{19}\text{F}$  NMR spectrum (565 MHz,  $\text{CDCl}_3$ ) of **6a**



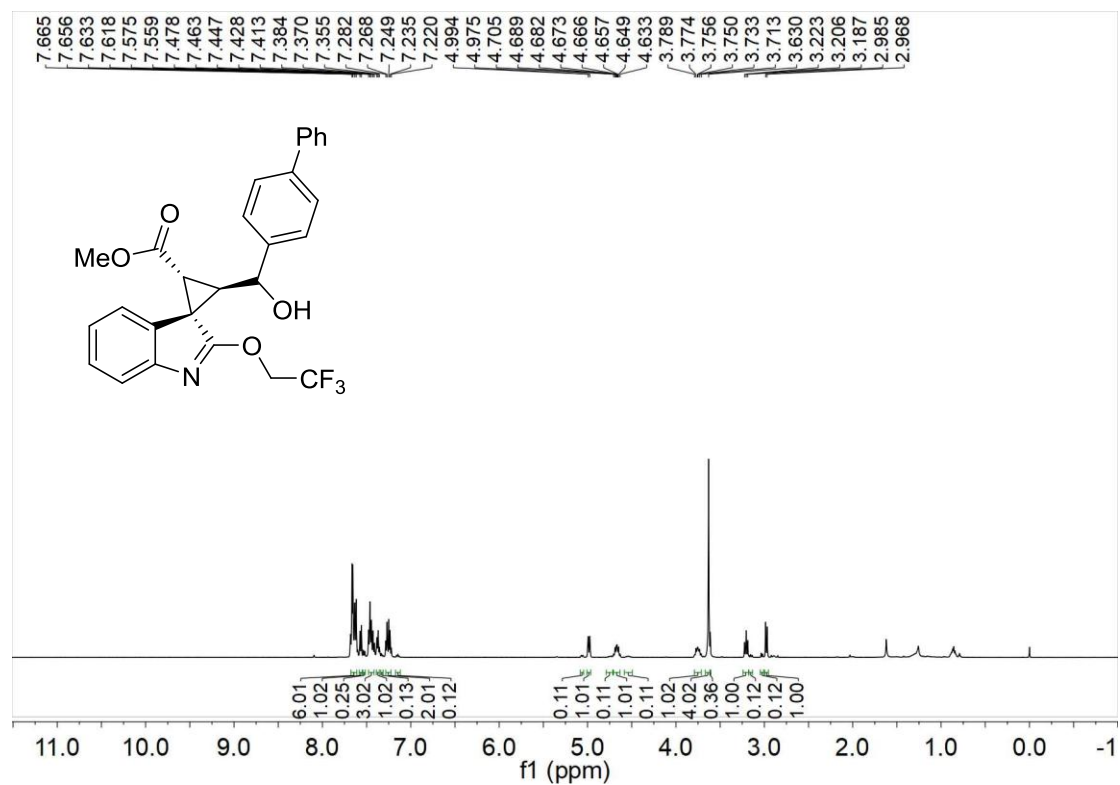

**Figure 103.** <sup>1</sup>H NMR spectrum (500 MHz, CDCl<sub>3</sub>) of **6b**

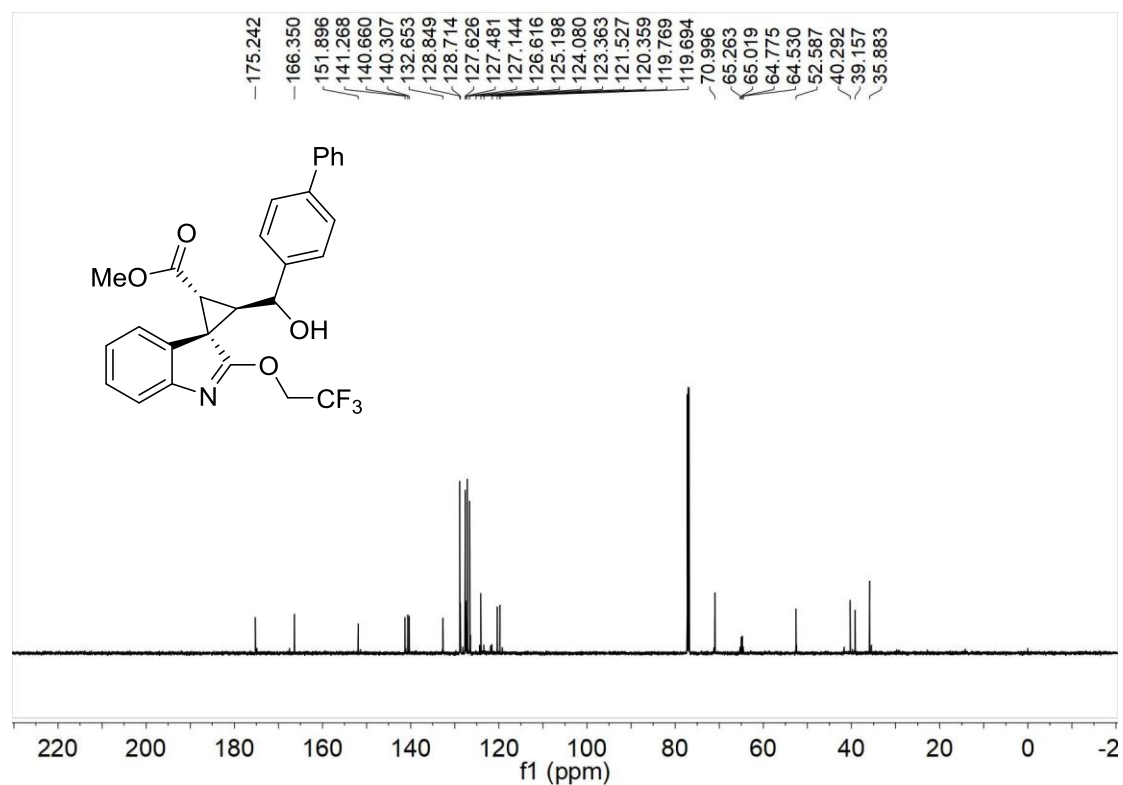

**Figure 104.** <sup>13</sup>C NMR spectrum (151 MHz, CDCl<sub>3</sub>) of **6b**

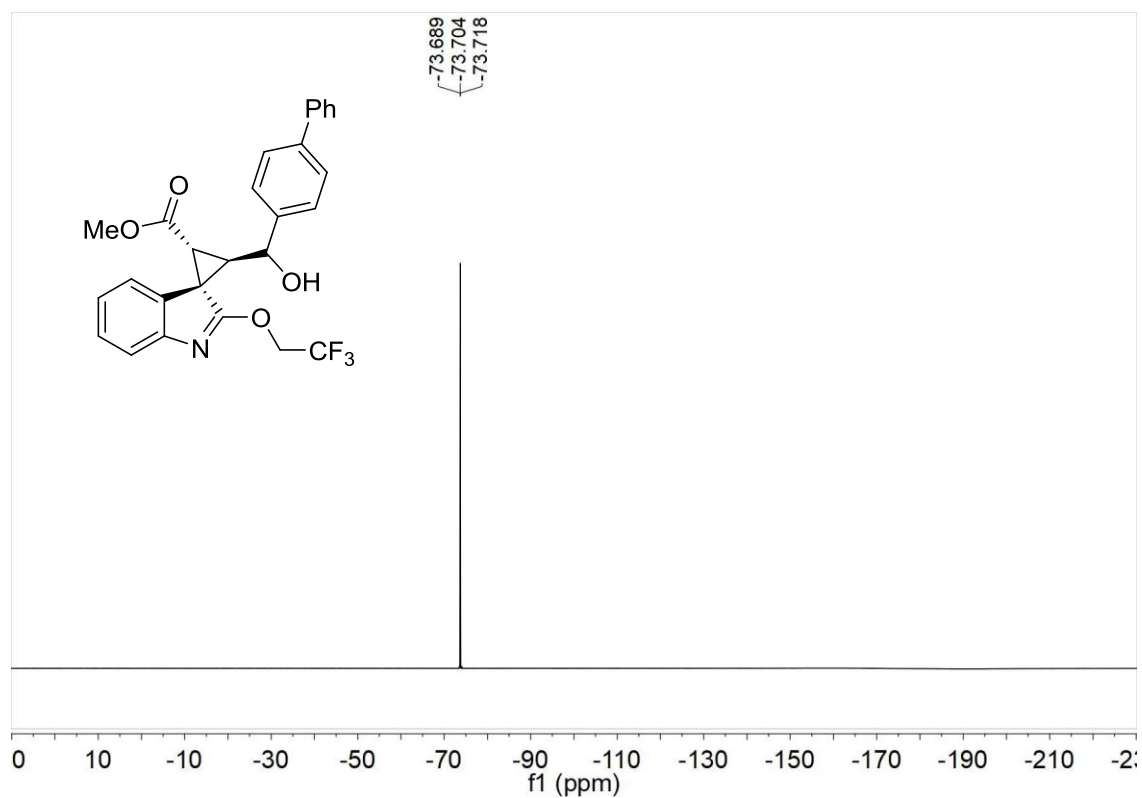

**Figure 105.**  $^{19}\text{F}$  NMR spectrum (565 MHz,  $\text{CDCl}_3$ ) of **6b**

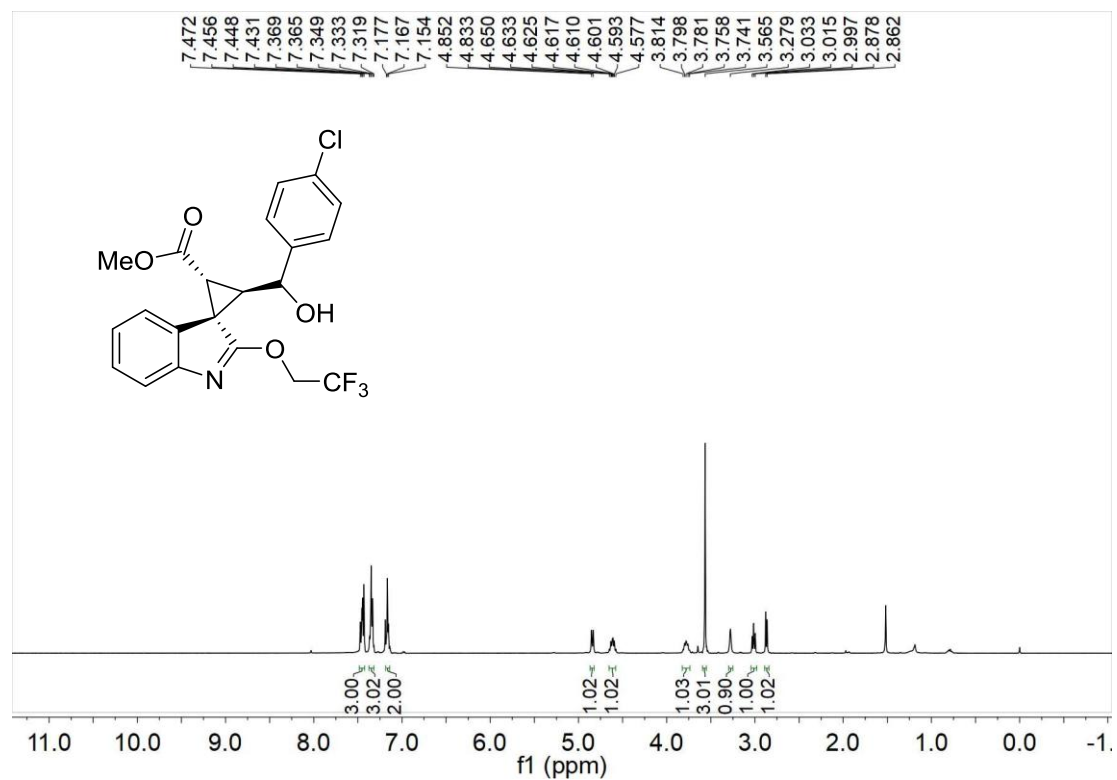

**Figure 106.**  $^1\text{H}$  NMR spectrum (500 MHz,  $\text{CDCl}_3$ ) of **6c**

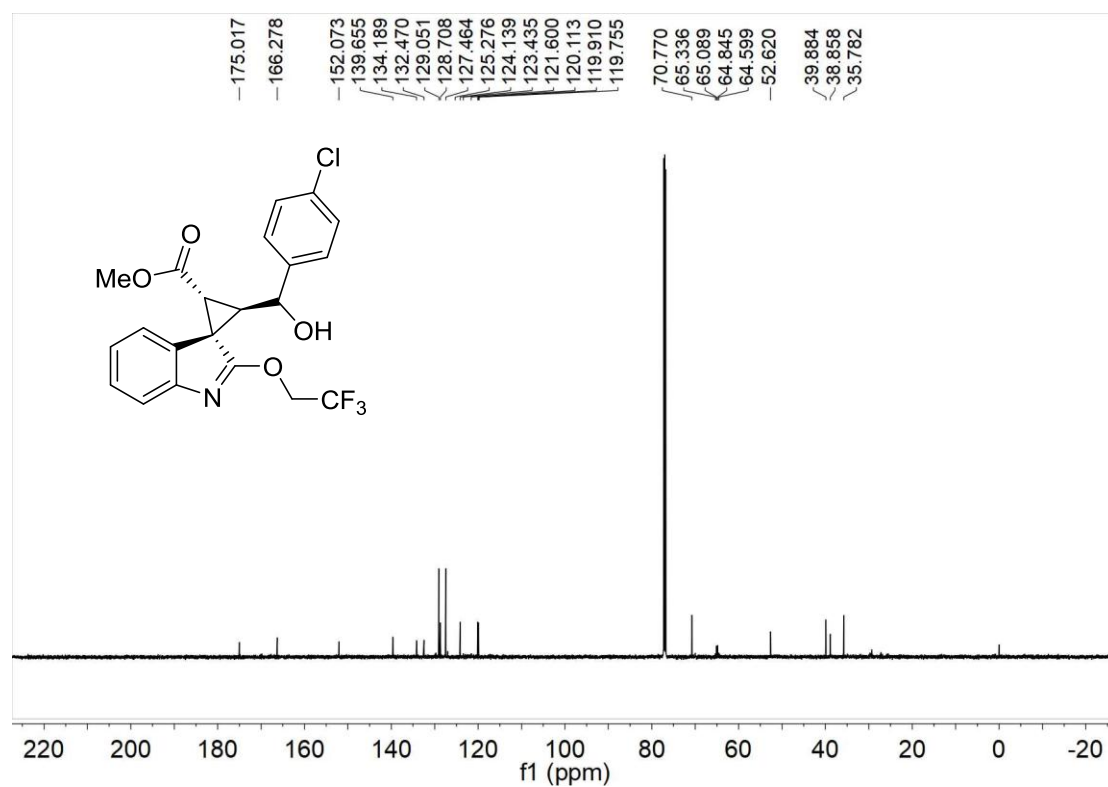

**Figure 107.** <sup>13</sup>C NMR spectrum (151 MHz, CDCl<sub>3</sub>) of **6c**

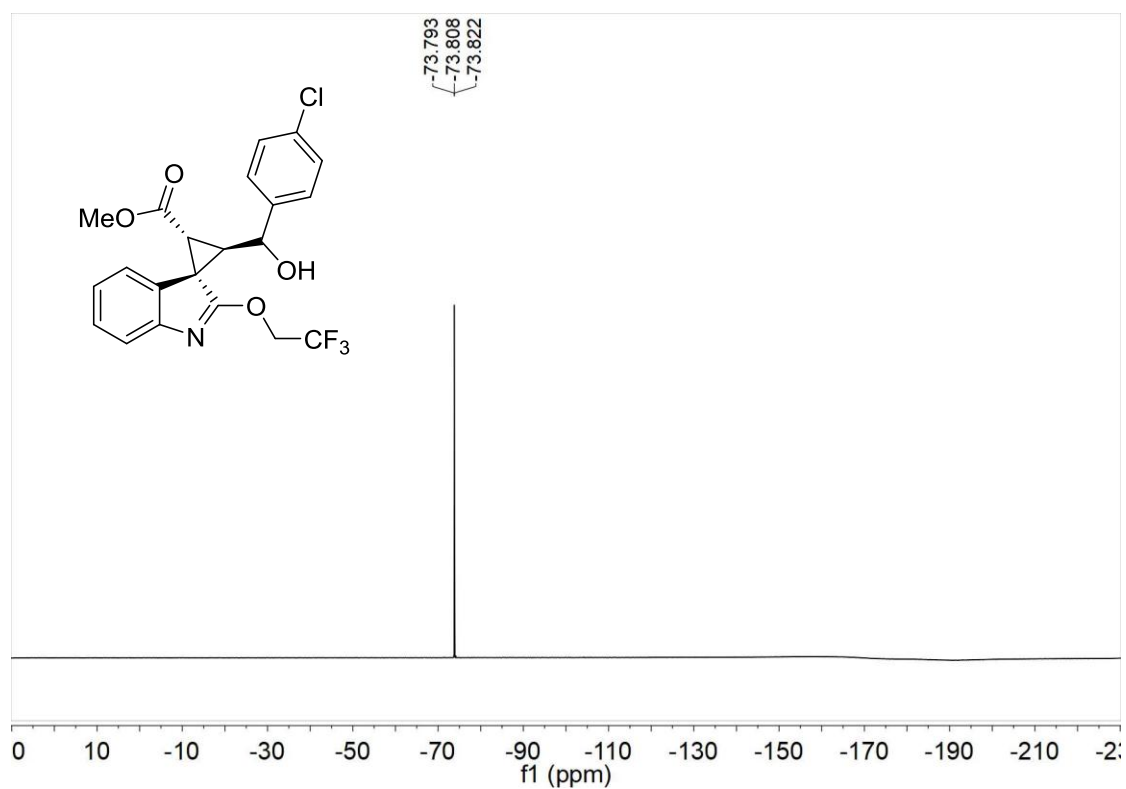

**Figure 108.** <sup>19</sup>F NMR spectrum (565 MHz, CDCl<sub>3</sub>) of **6c**

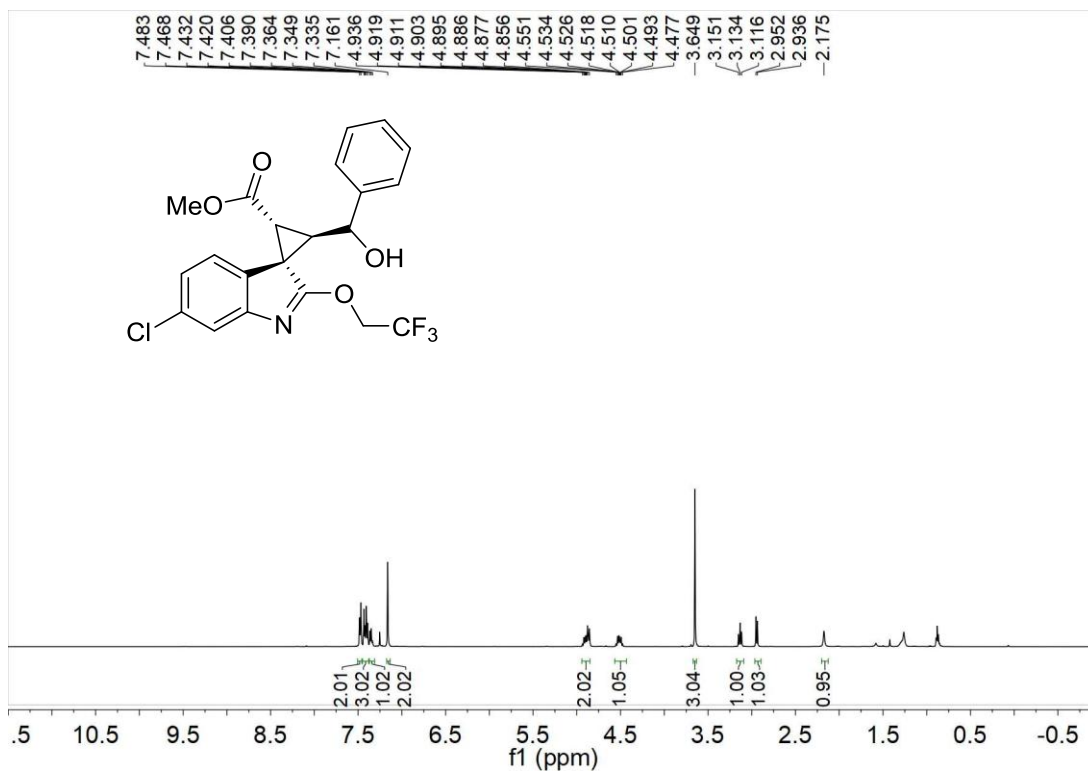

**Figure 109.** <sup>1</sup>H NMR spectrum (500 MHz, CDCl<sub>3</sub>) of **6d**

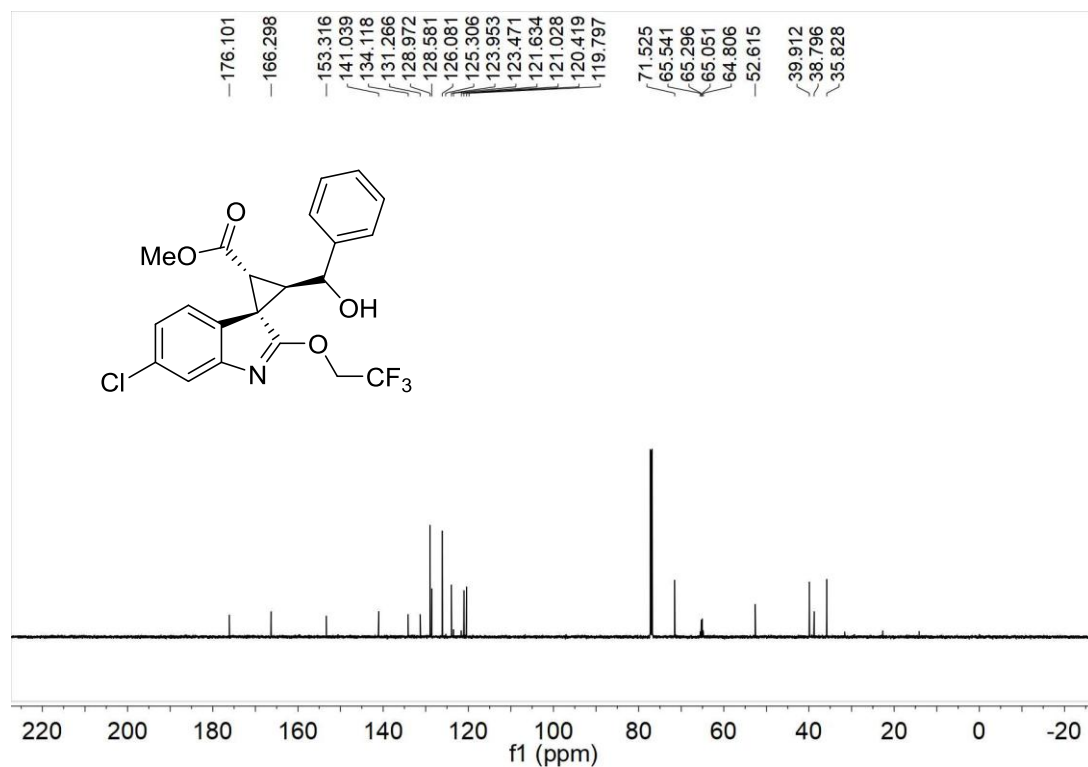

**Figure 110.** <sup>13</sup>C NMR spectrum (151 MHz, CDCl<sub>3</sub>) of **6d**

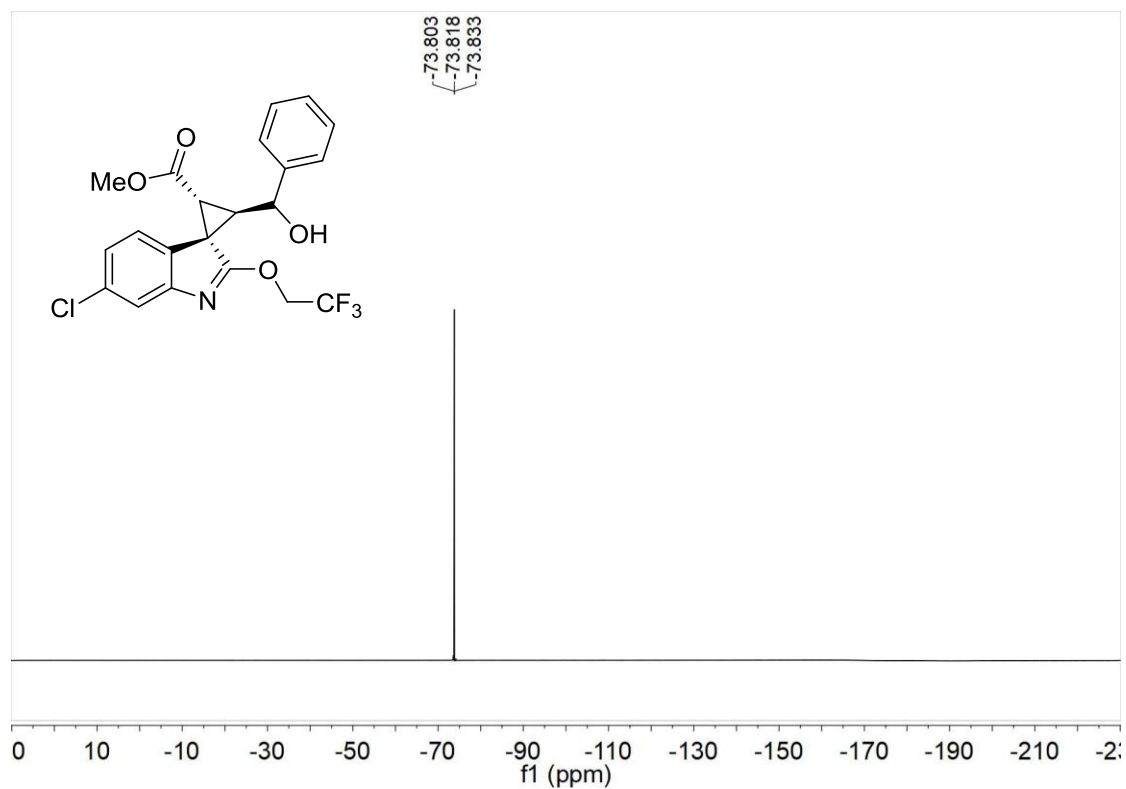

**Figure 111.**  $^{19}\text{F}$  NMR spectrum (565 MHz,  $\text{CDCl}_3$ ) of **6d**

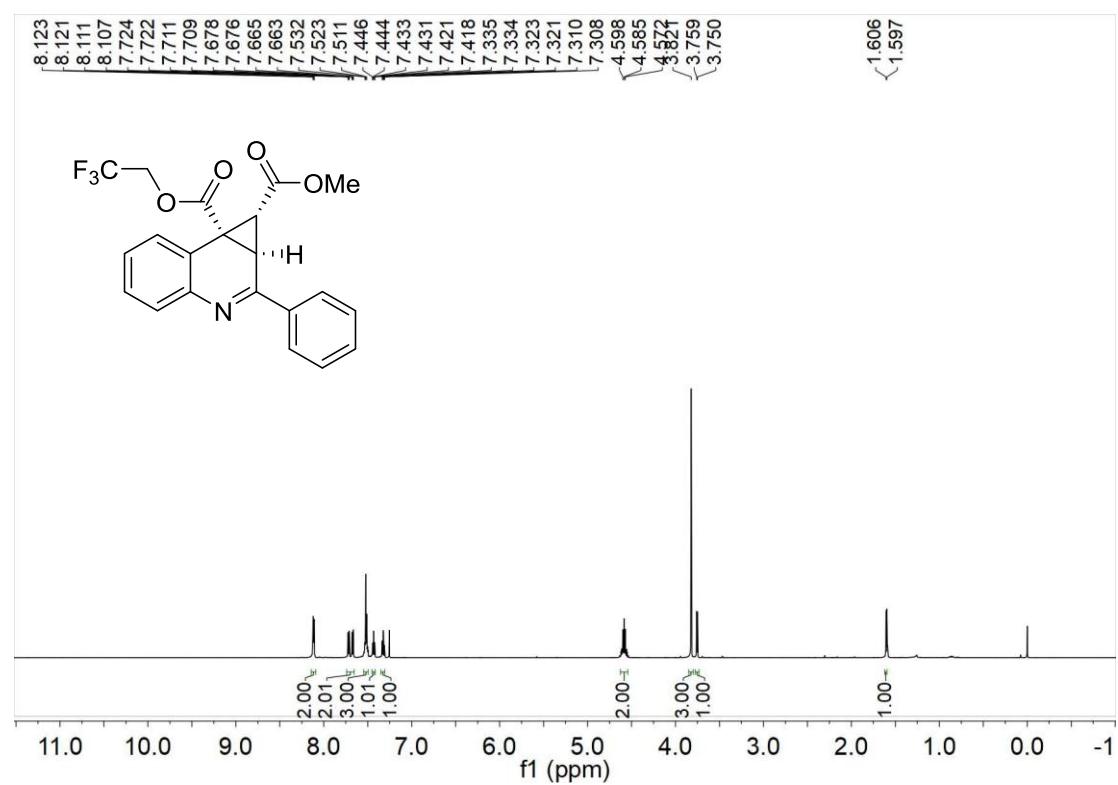

**Figure 112.**  $^1\text{H}$  NMR spectrum (600 MHz,  $\text{CDCl}_3$ ) of **7a**

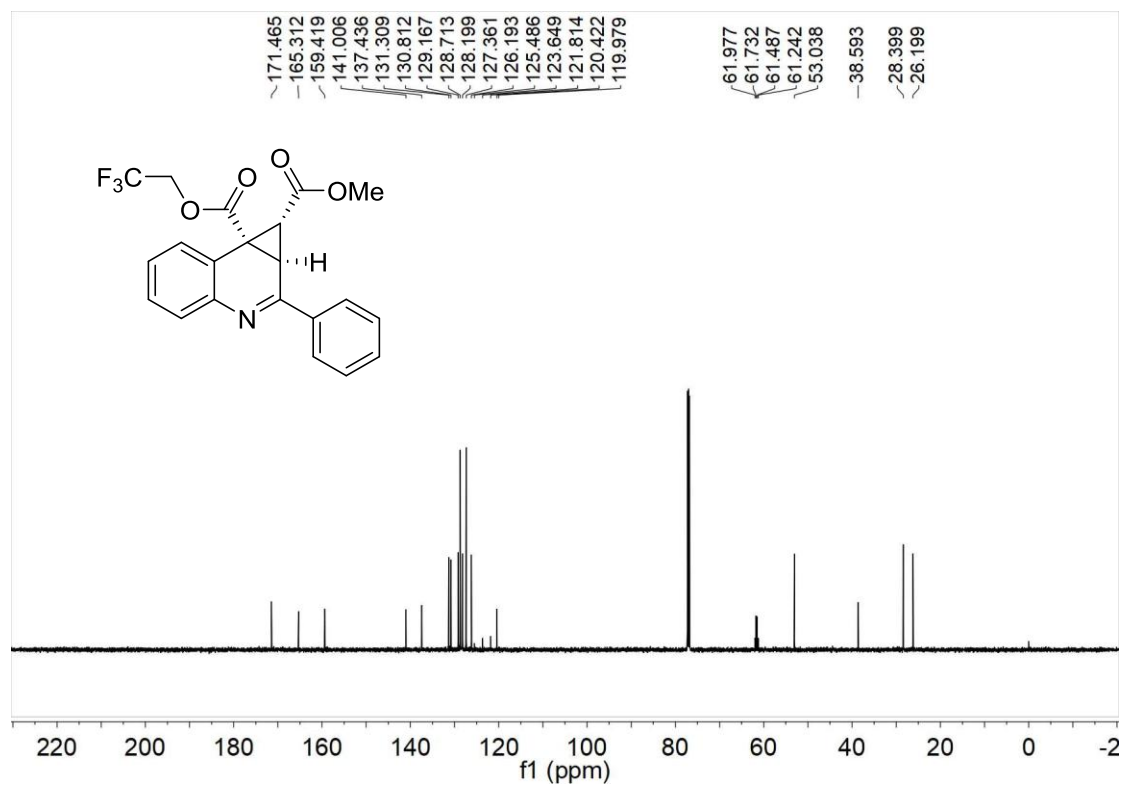

**Figure 113.**  $^{13}\text{C}$  NMR spectrum (151 MHz,  $\text{CDCl}_3$ ) of **7a**

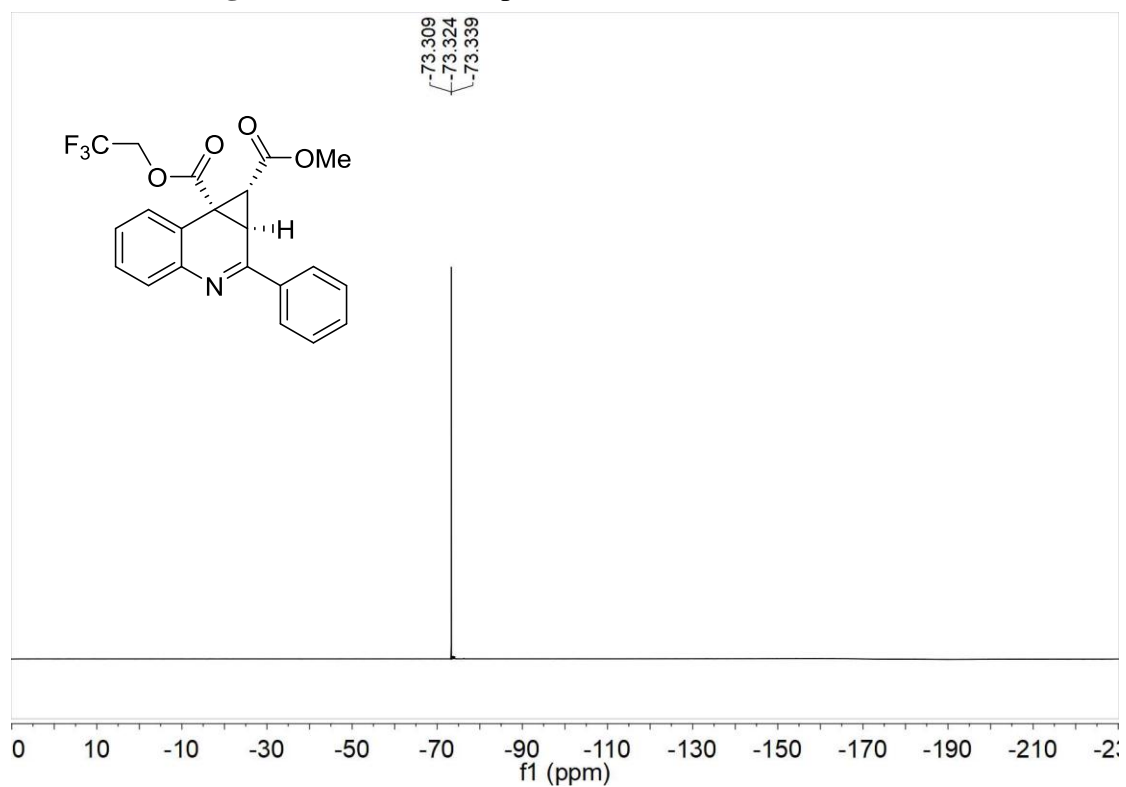

**Figure 114.**  $^{19}\text{F}$  NMR spectrum (565 MHz,  $\text{CDCl}_3$ ) of **7a**

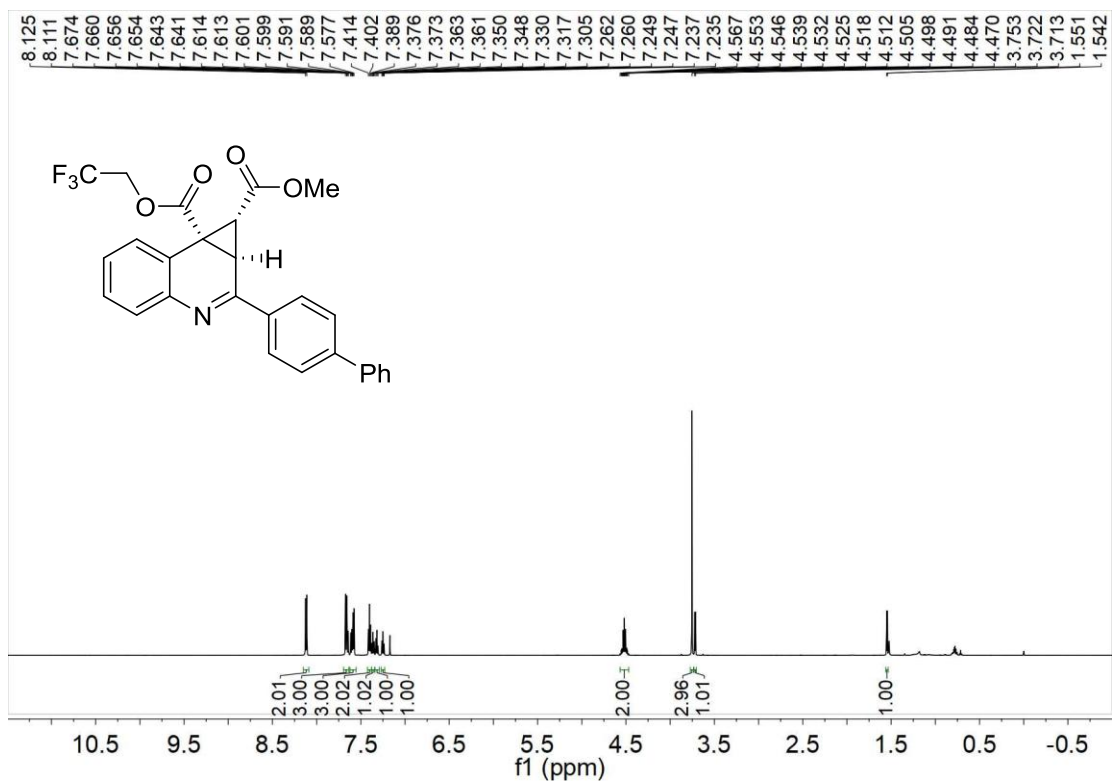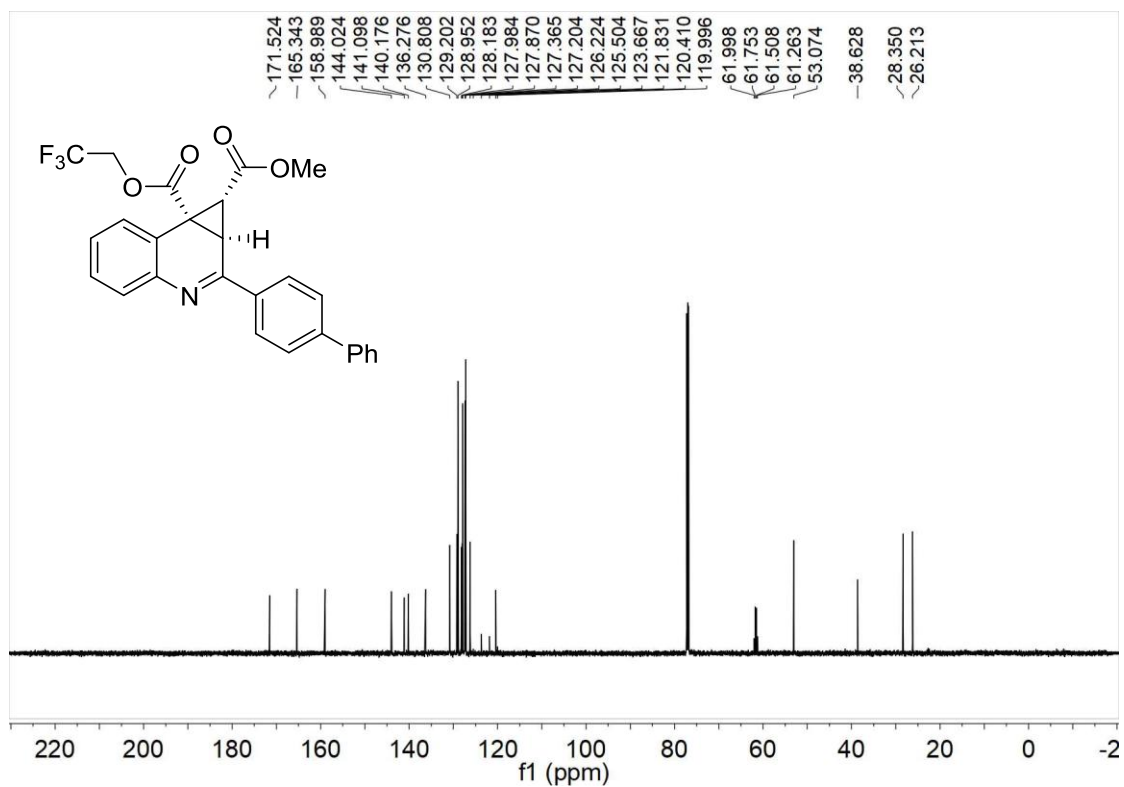

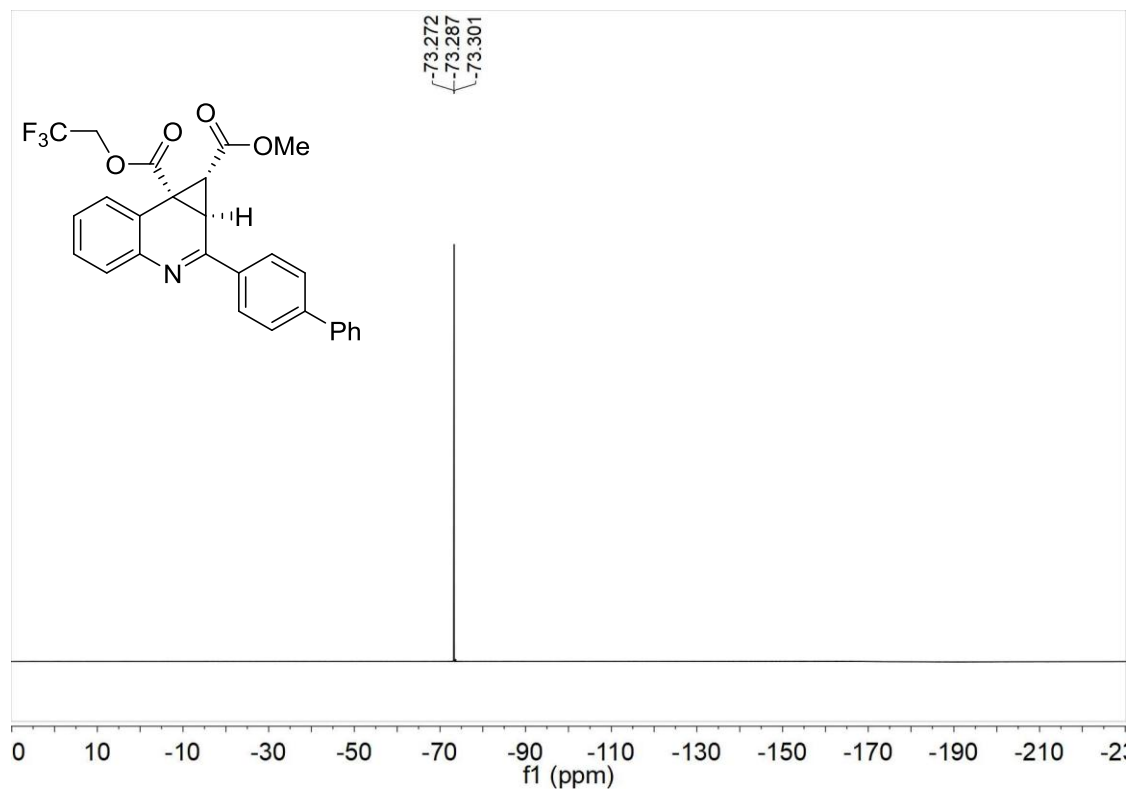

**Figure 117.**  $^{19}\text{F}$  NMR spectrum (565 MHz,  $\text{CDCl}_3$ ) of **7b**

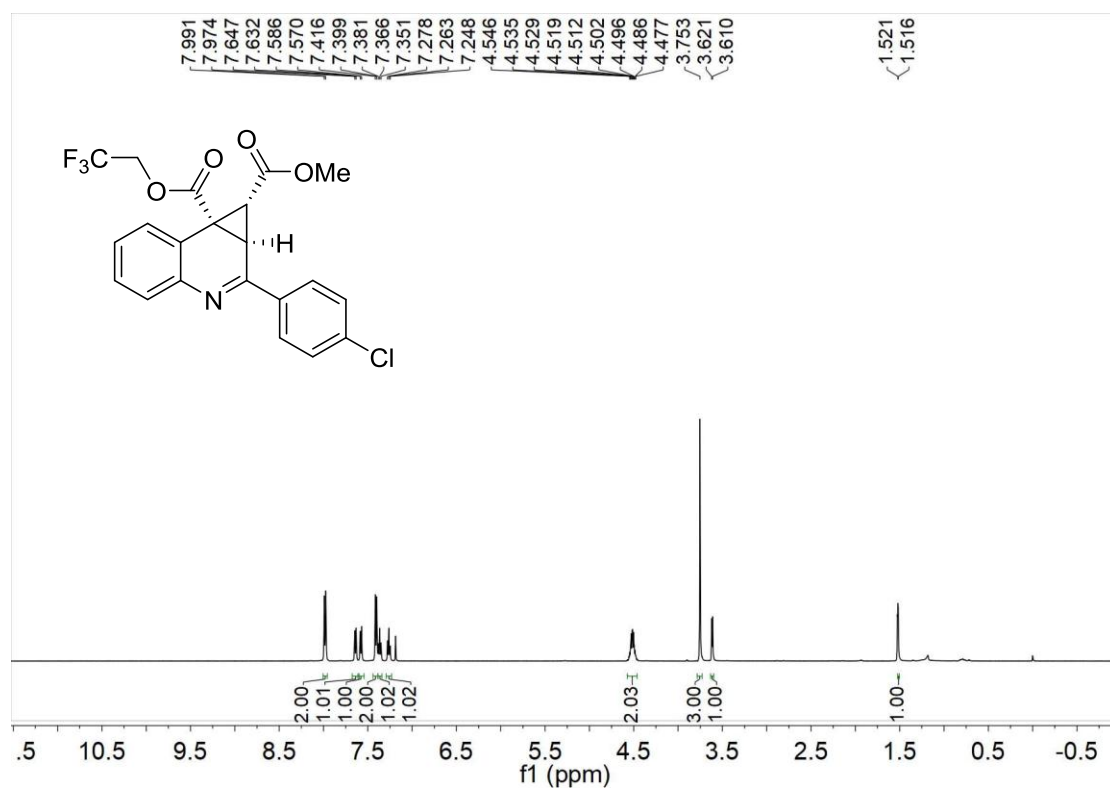

**Figure 118.**  $^1\text{H}$  NMR spectrum (500 MHz,  $\text{CDCl}_3$ ) of **7c**



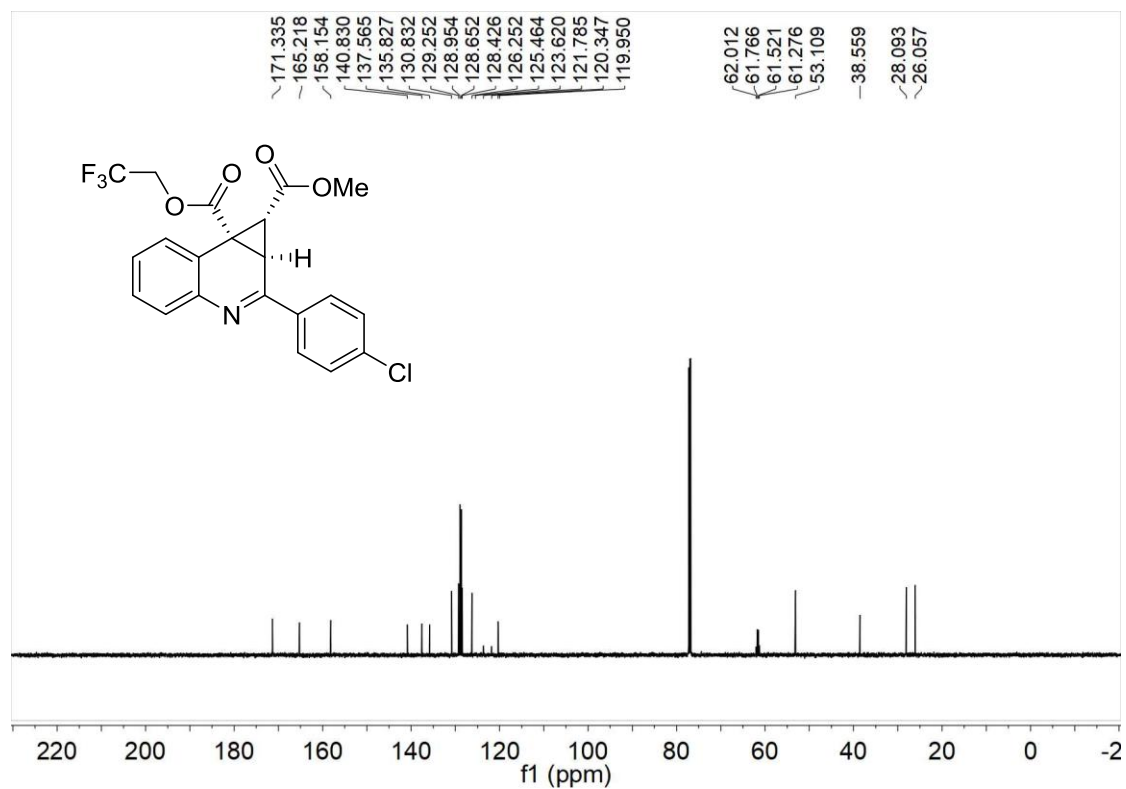

**Figure 119.** <sup>13</sup>C NMR spectrum (151 MHz, CDCl<sub>3</sub>) of **7c**

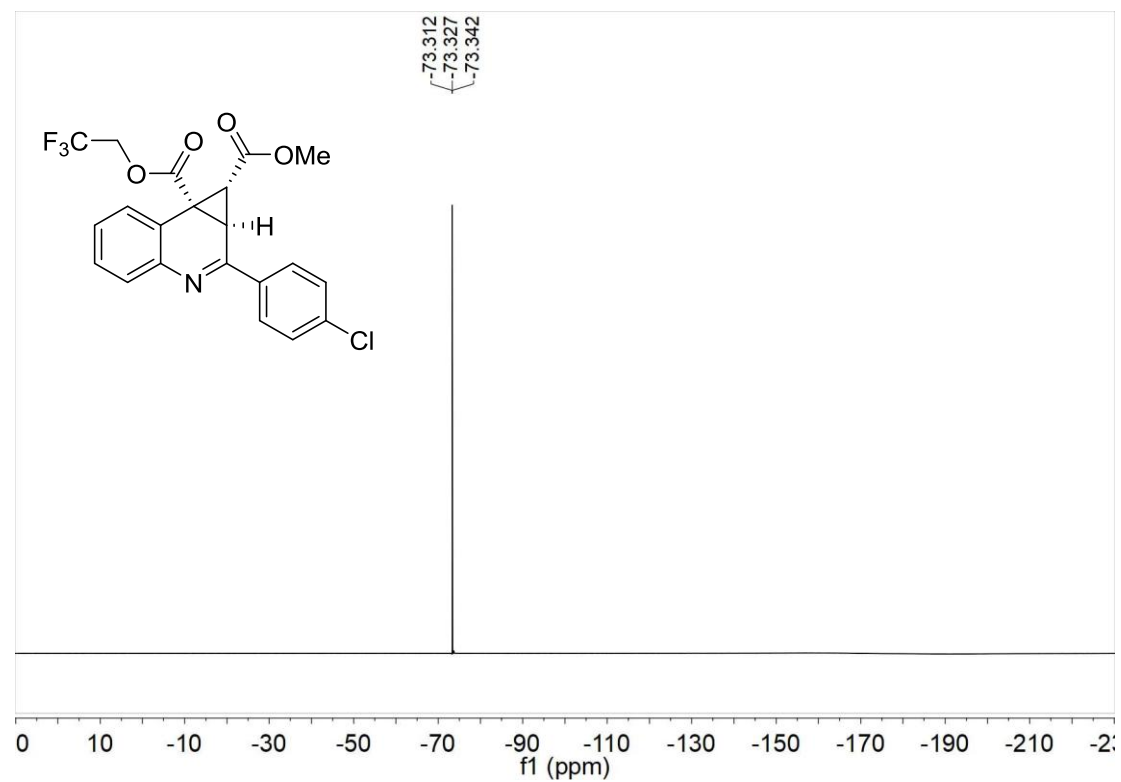

**Figure 120.** <sup>19</sup>F NMR spectrum (565 MHz, CDCl<sub>3</sub>) of **7c**

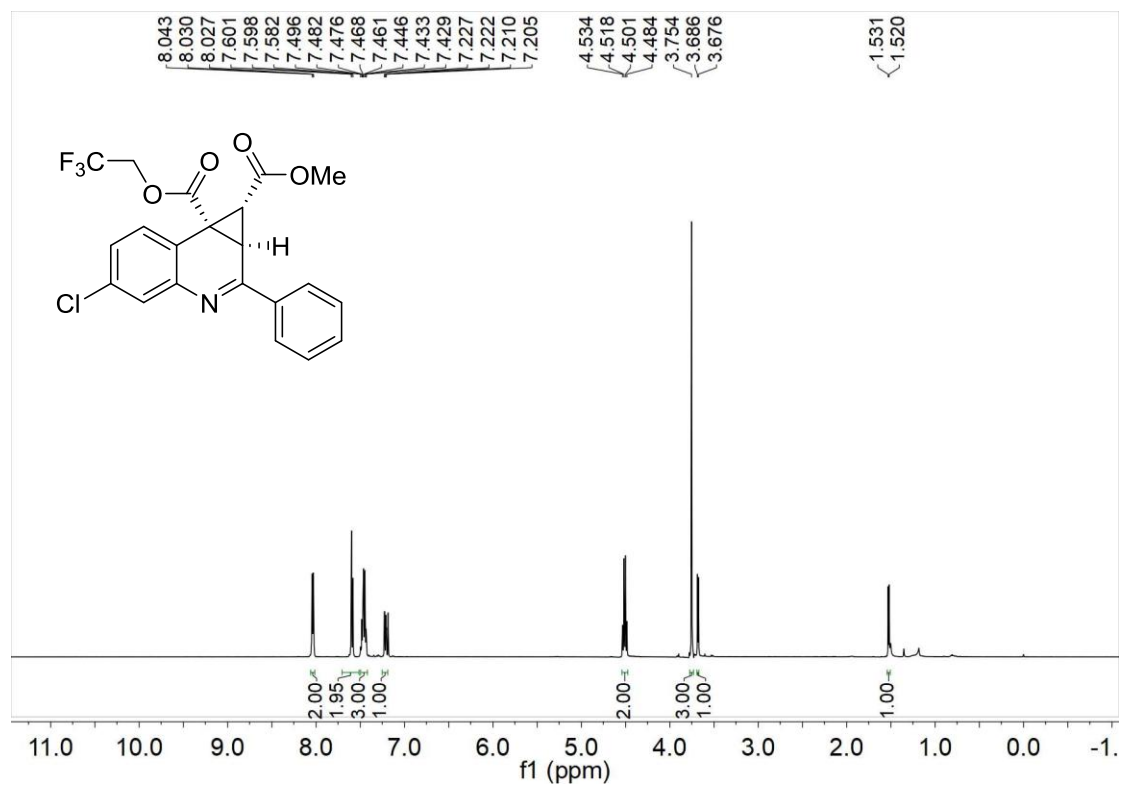

**Figure 121.**  $^1\text{H}$  NMR spectrum (500 MHz,  $\text{CDCl}_3$ ) of **7d**

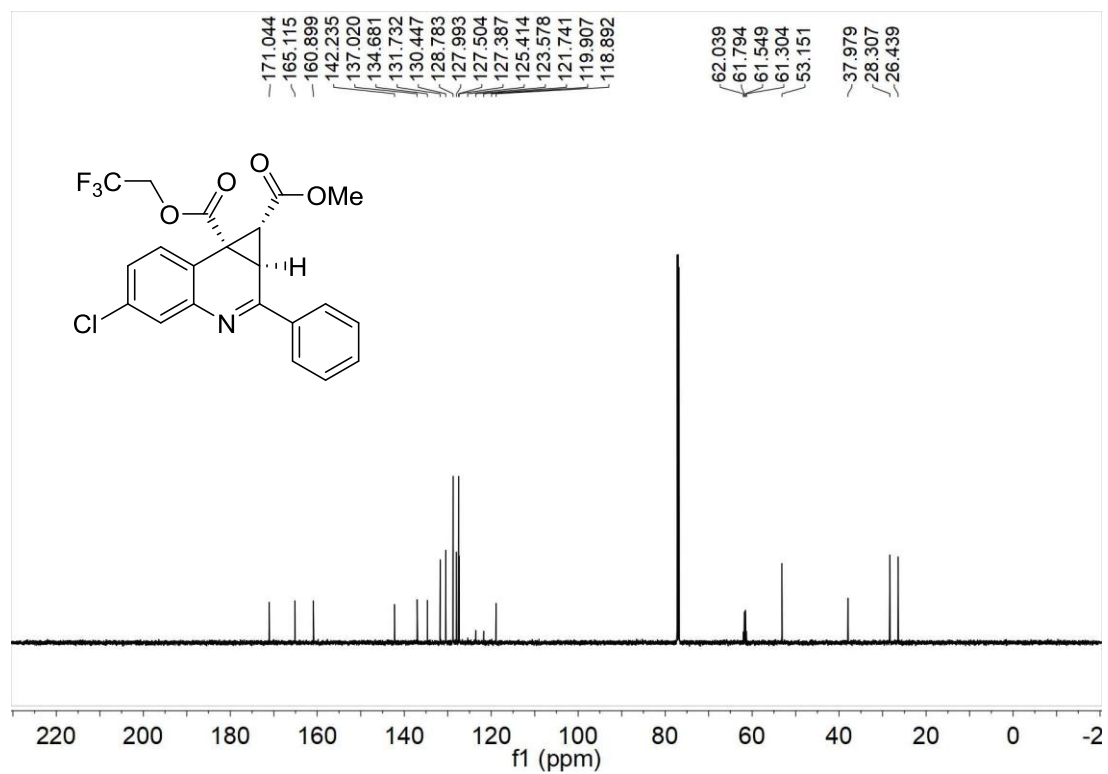

**Figure 122.**  $^{13}\text{C}$  NMR spectrum (151 MHz,  $\text{CDCl}_3$ ) of **7d**

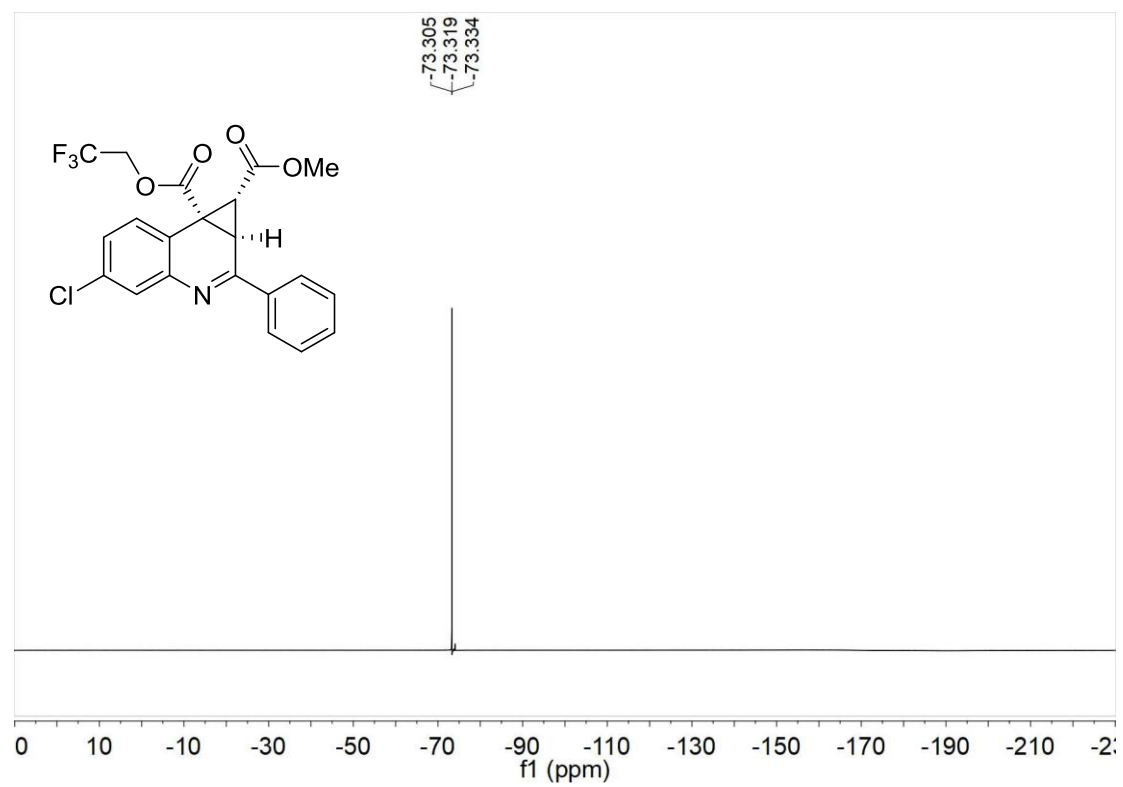

**Figure 123.**  $^{19}\text{F}$  NMR spectrum (565 MHz,  $\text{CDCl}_3$ ) of **7d**
